# Supplementary material
Source: PubMed Central journal article supplement (PMC2084474)
Supplement: NIHMS22213-supplement-2_Berenjeno_Su.pdf [file NIHMS22213-supplement-2_Berenjeno_Su.pdf]

**Inmaculada M. Berenjeno, Fátima Núñez, and Xosé R. Bustelo**

**TRANSCRIPTOMAL PROFILING OF THE CELLULAR  
TRANSFORMATION INDUCED BY Rho SUBFAMILY GTPases**

**SUPPLEMENTARY INFORMATION**

This file contains the following items

1. Supplementary Text
2. Supplementary Materials and Methods
3. Legends to Supplementary Figures
4. Supplementary Figures
5. Supplementary Tables

**Inmaculada M. Berenjeno, Fátima Núñez, and Xosé R. Bustelo**

**TRANSCRIPTOMAL PROFILING OF THE CELLULAR  
TRANSFORMATION INDUCED BY Rho SUBFAMILY GTPases**

**SUPPLEMENTARY INFORMATION-1**

**SUPPLEMENTARY TEXT**

## **Section I. Generation, biological properties, and use of cell lines utilized in our microarray analysis**

In order to generate the cell clones used in this study, we took advantage of the oncogenic properties of the constitutively active versions (Q63L mutants) of Rho subfamily proteins when overexpressed in rodent fibroblasts (Schuebel *et al.*, 1998). Based on this property, we transfected NIH3T3 cells with plasmids encoding the indicated versions of Rho subfamily proteins to obtain foci of transformed cells (**Fig. S1a**). Selected foci were picked, pooled, and used for the subsequent microarray experiments (**Fig. S1b**). These cell clones were considered optimal to analyze the transcriptomal changes associated to the chronic stimulation of Rho subfamily-dependent pathways, because they showed the typical hallmarks of Rho-expressing cells, including the increase in the number and thickness of stress fibers (**Fig. S1c**), the constitutive phosphorylation of the myosin light chain (MLC) (**Fig. S1d**) (Amano *et al.*, 1996), and the increased phosphorylation levels of MLC phosphatase (data not shown) (Etienne-Manneville & Hall, 2002; Jaffe & Hall, 2005; Kimura *et al.*, 1996; Nobes & Hall, 1995; Ridley & Hall, 1992). Other properties exhibited by these cells included loss of contact inhibition (**Fig. S1a**), anchorage growth independence, ability to metastasize to lungs when inoculated in nude mice through the tail vein, and tumorigenicity when injected intradermally in nude mice (data not shown) (del Peso *et al.*, 1997; Perona *et al.*, 1993; Sahai *et al.*, 1999).

To avoid the activation of genetic programs related to serum withdrawal or contact inhibition that may confound the detection of Rho-specific transcriptomal changes (Coller *et al.*, 2006), we cultured the chosen cell lines and the parental NIH3T3 cells in the presence of serum and maintained them at confluency levels lower than 70% prior to RNA

extraction. These conditions were therefore different to the previous cDNA microarray work with RhoA<sup>Q63L</sup>-transformed NIH3T3 cells that used samples derived from confluent and serum-starved cultures (Teramoto *et al.*, 2003). In addition, we isolated total RNAs from eight (in the case of NIH3T3 cells), seven (in the case of RhoA<sup>Q63L</sup>-transformed cells) and six (in the case of RhoB<sup>Q63L</sup>- and RhoC<sup>Q63L</sup>-transformed cells) independent cell cultures in order to make it possible a robust statistical treatment of the data obtained. RNAs samples were finally converted into biotinylated-cRNA probes and hybridized independently to Affymetrix arrays, thus allowing the monitoring of the expression status of  $\approx 12,000$  mouse genes.

## **Section II. Comparison of the transcriptomal changes induced by Rho subfamily proteins**

As indicated in the main text, the statistical analysis of our microarray data revealed two groups (“A” and “B”) of Rho-regulated genes. Group “A” included those genes that were similarly regulated by the three GTPases (**Fig. 1a**). This group was the largest, since it included approximately 83.6% of all genes regulated by these GTPases. Group “B” comprised genes that, according to statistical criteria, seemed to be specifically regulated by RhoA<sup>Q63L</sup> alone or shared by RhoA<sup>Q63L</sup> alone (4.8% of all genes, **Fig. 1b**) or shared by RhoA<sup>Q63L</sup> and RhoB<sup>Q63L</sup> (5.9% of all genes, **Fig. 1c**), RhoA<sup>Q63L</sup> and RhoC<sup>Q63L</sup> (3.1% of all genes, **Fig. 1d**) or RhoB<sup>Q63L</sup> and RhoC<sup>Q63L</sup> (2.6% of all genes, **Fig. 1e**). We could not detect genes uniquely regulated by RhoB<sup>Q63L</sup> or RhoC<sup>Q63L</sup> GTPases (**Fig. 1**). Based on these data, we concluded that RhoA<sup>Q63L</sup>, RhoB<sup>Q63L</sup>, and RhoC<sup>Q63L</sup> induced changes in a total number of 1,008, 950, and 924 genes, respectively (**Fig. 1**). Despite this initial classification, a more

Careful examination of our microarray data indicated that the segregation of the “A” and “B” groups was only a statistical effect and did not stand a solid scrutiny under more biological criteria. Thus, we observed that most “B” subset genes showed tendencies of change similar to those observed in the “A” group when compared to the parental cell line (for example, see experimental samples present in **Fig. 1b,d**). In this case, their exclusion from the latter group was only due to the fact that their expression levels did not pass the arbitrary fold change ( $\geq 1.5$  fold) or  $P$  values ( $\leq 0.01$ ) set forth in our statistical analysis. Alternatively, some genes were excluded from the “A” group because their expression values showed variation in some, but not all, of the RNA samples used in the analysis (i.e., **Fig. 1c**, RhoC<sup>Q63L</sup> samples 1-3). When those samples were excluded, those genes showed similar expression patterns in all Rho subfamily-transformed cells (data not shown). The only exception falling outside this description is the *thrombospondin 1* gene, which was up-regulated and down-regulated by RhoA<sup>Q63L</sup> and RhoB<sup>Q63L</sup>, respectively. This gene did not show variations in the case of RhoC<sup>Q63L</sup>-transformed cells (**Table S1**). Based on this analysis, we concluded that RhoA, RhoB and RhoC proteins induce very similar transcriptomal profiles, at least in the case of NIH3T3 cells.

### **Section III. Corroboration of microarray data using independent techniques**

For the independent confirmation of the microarray results, we analyzed the expression of 27 of the up-regulated and 20 of the down-regulated genes in the parental and Rho-transformed cells using real-time quantitative RT-PCR analysis. This analysis confirmed that these 47 genes were indeed regulated by Rho subfamily GTPases (**Table S2**). Subsequent studies during the characterization of the RhoA<sup>Q63L</sup>-dependent transcriptome

corroborated the differential expression of 10 extra genes (**Fig. S5**). However, we found that the fold changes obtained for the analyzed transcripts were usually higher in the RT-PCR analysis than in the microarray experiments (compare **Tables S1** and **S2**). Such discrepancy between Affymetrix microarray data and other independent techniques has been noted before by others (Chen *et al.*, 2001; Rajasekhar *et al.*, 2003). We also corroborated the differential expression of 16 genes at the protein level by immunoblot analysis with appropriate antibodies (see **Figs. 2c, S3, S4 and S6**, data not shown), indicating that the altered transcript levels had also an impact in the proteome of these cells. Finally, we detected transcripts in our microarray-derived data that had been previously described as targets for RhoA (i.e., *cyr61*, *plaur*, *tnc*, *ctgf*, *ptgs2*) (Benitah *et al.*, 2003; Chowdhury & Chaqour, 2004; Han *et al.*, 2003; Muller *et al.*, 2000; Ott *et al.*, 2003; Sarasa-Renedo *et al.*, 2006), a result that further demonstrates that the microarray experiments yielded a bona-fide picture of the downstream signaling of these GTPases. However, our experiments indicated that RhoA<sup>Q63L</sup> promoted the upregulation of the *thrombospondin 1* gene, a result that is in contrast to other report indicating that the downregulation of this gene in Ras-transformed kidney epithelial cells is both RhoA- and Rock-dependent (Watnick *et al.*, 2003). Unfortunately, we could not compare our transcriptional profile to that previously obtained using cDNA-bases arrays since that database was not present in the original publication (Teramoto *et al.*, 2003).

#### **Section IV. Functional annotation of Rho-regulated genes**

The global analysis of the microarray data indicated that the fold changes of the regulated genes follow a Poisson curve (**Fig. S2**). For example, the majority of RhoA<sup>Q63L</sup>-regulated

genes change between 1.5- and 3.4-fold while a small minority show variation levels outside that interval (**Fig. S2**). Up-regulated and down-regulated genes follow a similar trend, although we observed a significant enrichment of induced and repressed loci in the subset of genes displaying the lowest or highest fold change variations, respectively (**Fig. S2**). This small variation in transcript levels suggests that Rho-mediated transformation relies mainly in modulating the levels of activity of active genes rather than being based on turning on previously silent loci. In general, the fold changes detected were similar in RhoA<sup>Q63L-</sup>, RhoB<sup>Q63L-</sup> and RhoC<sup>Q63L-</sup>-transformed cells although, in a minority of cases, we found genes with marked expression differences among those cells. For instance, the *mrpplf3* mRNA increases 8-, 26.8, and 19-fold in RhoA<sup>Q63L-</sup>, RhoB<sup>Q63L-</sup> and RhoC<sup>Q63L-</sup>-transformed cells, respectively (**Table S1**). When classified in terms of total fold change variations, we observed that the most up-regulated genes encoded secreted proteins (Mrpplf3, Ccl17, CTGF, serpin1) (**Table S1**). The most down-regulated genes coded also for secreted proteins (Smoc2, osteoglycin) (**Table S1**). Interestingly, we observed that the percentages of up-regulated versus down-regulated genes were different depending on the subcellular localization of their encoded proteins. The nucleus was the subcellular site with predominant up-regulated loci whereas the extracellular compartment had a larger proportion of inhibited genes. As it will be discussed below, this is mainly due to the large number of nuclear genes involved in DNA-related functions and to the severe reduction in the expression of extracellular matrix proteins in Rho-transformed cells.

The functional annotation of the identified genes revealed that the cell transformation mediated by the chronic stimulation of Rho subfamily GTPase pathways targeted specific biological processes. Thus, we observed that Rho proteins promote a

general shut-off of extracellular matrix components (8 collagen precursors, procollagen proteinases, fibronectin, laminin, decorin, lumican, matrilin, extracellular proteases, Timp3 and lysyl oxidase, among others), although there was a small fraction of those genes that were up-regulated by Rho proteins (**Table S1**). Most of the down-regulated genes in this functional class corresponded to a cluster of genes that are induced by TGF $\beta$  in mouse fibroblasts (Verrecchia *et al.*, 2001). Interestingly, we have found that other proteins up-regulated by TGF $\beta$  that belong to other functional classes were also down-regulated by Rho proteins (i.e., metallothionine 1 and 2) (Verrecchia *et al.*, 2001) (**Table S1**). Consistent with a possible antagonism between Rho- and TGF $\beta$ -dependent routes, we also observed the repression in these cells of other elements of the TGF $\beta$  pathway such as Ltbp4 (Sternier-Kock *et al.*, 2002), osteoglycin (Bentz *et al.*, 1989), and Smads (Hata *et al.*, 1998; Kretschmar *et al.*, 1997; Kretschmar & Massague, 1998; Lagna *et al.*, 1996; Liu *et al.*, 1996; Liu *et al.*, 1997). Conversely, we detected an increase in TGF $\beta$  antagonists such as Grem2 (Sudo *et al.*, 2004) (**Table S1**). These results suggest that Rho proteins orchestrate the inhibition of a specific subset of genes regulated by the TGF $\beta$  pathway in order to accomplish their tumorigenic program in mouse fibroblasts.

Another important subset of Rho-targeted genes include loci encoding extracellular ligands exerting autocrine/paracrine functions and of specific transmembrane receptors (**Table S1**). Thus, we observed changes in the induction (Ccl2, Ccl7, Cxcl1, Cxcl5) and inhibition (Cxcl1, Cxcl12) of two subsets of chemokines, the up-regulation of neurotrophins (BDNF, GDNF, NGF), and the induction (VEGF-A, EphrinB2, semaphorins, Plf1, Plf2, Mrpplf3) or repression (VEGF-B, VEGF-D) of proangiogenic factors. We also recorded the up-regulation of insulin-related molecules (IGF2, IGFbp6), CTGF-like



proteins (CTGF, Cyr61), and EGF-receptor ligands (epiregulin, heparin-binding EGF-like factor). This spectrum of deregulated genes may contribute to the malignant properties of Rho transformed cells, since some of their human counterparts (*cxcl1* and *epiregulin*) have essential roles in the ability of cells to metastasize to specific tissues (Minn *et al.*, 2005). While the EGF-R- and insulin-related signaling appears to be promoted in these cells via the up-regulation of ligands, we have also observed that Rho-mediated transformation correlates with a strong repression of FGF and PDGF signaling routes. This is done via the down-modulation of the expression of genes encoding some of their receptors (FGF-R1, FGF-R2, PDGF-R $\alpha$ , PDGF-R $\beta$ ) and, in addition, by repressing genes encoding regulatory molecules of these routes such as Twist1 (a transcriptional factor that modulates FGF-R expression) and Fibp (an intracellular FGF binding protein). The down-modulation of PDGF-R, a common event in some transformed cells (Bowen-Pope *et al.*, 1984; Stice *et al.*, 1999; Vaziri & Faller, 1996; Wang *et al.*, 1996), was confirmed by both real time quantitative RT-PCR and immunoblotting (**Table S2** and **Fig. S3**).

Rho GTPases also impact on signal transduction pathways located downstream of tyrosine kinase receptors (**Table S1**). In the case of the Ras pathway, Rho proteins inhibit the expression of Ras subfamily proteins (R-Ras) and of RalGDS, a key downstream element of Ras oncoproteins (Hofer *et al.*, 1994; Kikuchi *et al.*, 1994; Rodriguez-Viciana & McCormick, 2005; Spaargaren & Bischoff, 1994). In addition, we observed the up-regulation of three phosphatases involved MAPK inactivation (Dusp1, Dusp6, Dusp9), and a RasGAP (Rasa4). The overexpression of Dusp1 was demonstrated by immunoblot experiments (**Fig. S3**). Finally, the microarray data indicated that Rho GTPases target phosphatidylinositol 3-kinase (PI3-K) signal transduction elements, including the

repression of the PI3-K p85 $\alpha$  regulatory subunit and PTEN, a lipid phosphatase that controls negatively the signaling output of the PI3-K route (Cully *et al.*, 2006; Li *et al.*, 1997; Maehama & Dixon, 1998; Myers *et al.*, 1997). In the case of Rho/Rac routes, we observed a consistent repression of a subset of genes encoding Rac/Cdc42 exchange factors (GEFT, Trio) and downstream targets (Stat3). Conversely, Rho proteins promoted the induction of the gene encoding for RacGAP1, a Rac subfamily negative regulator. By contrast, we noticed that the cell transformation mediated by Rho proteins involved the promotion of their own pathways, since we detected increased levels of mRNAs encoding for either Rho exchange factors (Net1, NGEF) or effectors (mDia1 and 3).

Given the important role of Rho proteins in the regulation of cytoskeletal dynamics and microtubule stability (Jaffe & Hall, 2005), it is not surprising the detection of a large collection of cytoskeletal- and microfilament-related genes in the transcriptome of Rho-transformed cells (**Table S1**). In the former group, Rho proteins up-regulate the expression of specific actin molecules (actin  $\alpha$ 1,  $\gamma$ 2, actin-like 6A protein) while decreasing other isoforms (actin  $\beta$ ). Rho proteins also stimulate transcription of genes encoding proteins involved in different regulatory steps of the cytoskeleton, including G-actin sequestration factors (thymosin  $\beta$ 4), F-actin stabilization molecules (Ivns1abp), actin bundling and severing factors (actinins, Pdlim1, Capg), F-actin depolymerization molecules (cofilin2, transgelins 1 and 2), actin-binding proteins (i.e., coronin, Fez2, anillin), and nuclear proteins with recent cytoskeletal-related functions (Ezh2). Proteins belonging to those categories were also found targeted negatively by Rho proteins (i.e., Gas2, Fscn1, Aim1, Ablim, gelsolin) (**Table S1**). RhoA transformed cells also up-regulate genes encoding for integrin-related pathways, including some species of integrin subunits ( $\alpha$ 6), integrin-

associated proteins (osteopontin, Alcam, CD151, CD44, ERM proteins, and plakophilin 4). At the same time, they down-regulate negative regulators of integrin signaling (thrombospondin 2) and proteins that anchor them to the spectrin scaffold system (ankyrin 3,  $\alpha 2$  and  $\beta 2$  spectrin). These results indicate that Rho proteins may mediate integrin signaling not only by the induction of focal adhesions but also through the modification of the proteome of these structures.

A similar picture is observed in the case of proteins related with the microfilament network (**Table S1**). Thus, the analysis of the microarray data indicates that Rho proteins stimulate the expression of tubulin isoforms ( $\beta 5$ ,  $\gamma 1$ ) and a large collection of proteins involved in different aspects of microtubule (MT) biology such as MT stabilizers (Ckap2), tubulin sequestering proteins (stathmin), mitotic-associated MT proteins (NdeI, pericentrin), and 7 kinesin family members. In addition, they down-modulate other subsets of MT-associated proteins (MAPs), spindle assembly regulators (myosin X) and tubulin deacetylases (sirtuin 2). The simultaneous regulation by Rho GTPases of proteins with diverse, and sometimes antagonistic functions in the F-actin and tubulin cytoskeleton suggest that Rho proteins promote fluid cytoskeletal structures rather than fixing them in a polymerized, rigid status. The specific targeting of some of these loci may also contribute to the transforming program of Rho-transformed cells, since some of these cytoskeletal proteins have been linked to either growth promotion (i.e., the synergistic interaction of stathmin with osteopontin) or tumor suppression (Gas2, Aim1, sirtuin 2) (Brancolini *et al.*, 1997; Ray *et al.*, 1997; Yuan *et al.*, 2006).

RhoA and RhoB proteins have been involved in the regulation of vesicle trafficking by post-translational events mediated by specific effectors such as mDia and PRK1 (Ellis &

Mellor, 2000; Gampel *et al.*, 1999; Jaffe & Hall, 2005; Lamaze *et al.*, 1996; Leung *et al.*, 1999; Mellor *et al.*, 1998; Ridley, 2001; Sandilands *et al.*, 2004). This function appears to be also extended at the level of transcription, since we have observed a consistent reduction of the transcript levels for 5 Rab proteins (Rab3d, 5b, 9, 11a, and 24), a Rab exchange factor (Rin2), Rab acceptors (Rabac1), and regulators of the excision, fusion or targeting of endocytic vesicles (dynamin 1, clathrin, caveolin, SNAPs, syntaxins). We have also noted the general down-modulation of at least 6 transcripts encoding lysosomal proteins (**Table S1**). These results indicate that, at least in the case of constitutive signaling, Rho GTPases may influence the dynamics of vesicle trafficking by modulating the mRNA levels of key regulators of this biological process.

One of the main functional classes affected by Rho-mediated transformation is the group of molecules related to the regulation of gene transcription. Among the usual targets of Rho proteins, we could identify the regulation of AP1, NFκB, Myc, E2F, and SRF family proteins (**Table S1**). In the former case, we observed the up-regulation of c-Jun and Fra1, a Fos-like protein involved in invasiveness and cell motility. Instead, JunD1, an AP1 protein with anti-angiogenic potential, became down-regulated under the same experimental conditions (Belguise *et al.*, 2005; Gerald *et al.*, 2004; Kustikova *et al.*, 1998; Tkach *et al.*, 2003). We could not detect any variations in the levels of NFκB proteins. However, Rho-transformed cells displayed increased levels of two NFκB inhibitors (NFκBia and NFκBlz) and of Hivep2/Shnurri 2, a transcriptional regulator that binds κB sites (Jin *et al.*, 2006; Karin, 2006; Kimura *et al.*, 2005). In the Myc family, we observed that Rho GTPases promoted c-Myc, Myb12 and N-Myc expression while inhibiting the c-Myc transcriptional repressor Mnt. In the case of the E2F complex, we detected the up-

regulation of E2F1, E2F8, the E2F1 dimerization partner Dp1, and Lin9, an Rb-binding protein with growth suppressing properties (Gagrica *et al.*, 2004). A decrease in Cri1, a p300/CBP repressor was also observed (Miyake *et al.*, 2000). In addition to increased levels of E2F, the functional output of this route is probably further increased by the elevation of cyclin D1 and cyclin F detected at the mRNA and protein levels in Rho-transformed cells (**Table S1** and **Fig. S4a**, respectively). The up-regulation of the E2F pathway is also supported by the detection of a significant number of E2F-target genes in our microarray data (see below and **Fig. S4c**). We saw no major changes in *srf* mRNA levels, although Rho-transformed cells elicited a surprising reduction in the mRNA levels of MAL/Mkl1, a potent co-activator of SRE elements (Miralles *et al.*, 2003; Settleman, 2003). Despite these data, we surmise that there is an activation of SRF activity at the post-translational level, since the transcriptome of Rho-transformed cells contains many SRF-regulated genes. Thus, when considering the previously published microarray data on the SRF-dependent, Mik1/MAL-independent transcriptome (Selvaraj & Prywes, 2004), we could see that 45% of the reported genes were similarly-regulated by Rho GTPases. Furthermore, 9 out of 10 Mkl1/MAL-dependent genes were also altered in a similar manner by Rho proteins, further supporting the constitutive activation of the SRF pathway in the Rho-expressing cell clones. We also detected the induction of p53 by Rho proteins, an event that was associated to the concomitant co-regulation of other elements of its pathway such as the kinase Vrk1 and the Mdm2 inhibitor (Brooks & Gu, 2006; Vega *et al.*, 2004). The elevation of E2F, c-Myc, and c-Jun proteins was demonstrated by immunoblot experiments (see main text, **Fig. 2c**). Finally, we noticed the up-regulation of transcriptional factors not previously linked to Rho GTPase function, such as the Pbx3

oncoprotein, Np95 (a transcriptional factor implicated in topoisomerase expression), Rrn3 (involved in inducing the expression of RNA polymerase I), and basonuclein (concerned in transcription from rRNA genes). Interestingly, we also observed increased mRNA levels for at least 6 transcriptional repressors (Ifrd1, Hdac1, Sin3, Lrrfip1, Klf4 and Sap30) as well as for molecules involved in the epigenetic regulation of gene expression (i.e., nucleosome assembly factors, phospho/methylated histone-binding proteins, and histone methyltransferases), indicating that the transcriptome dynamics of Rho-transformed cells are modulated by both transcriptional and epigenetic events. Our microarray data also revealed a significant percentage of transcriptional factors whose expression is inhibited by Rho-mediated cell transformation (**Table S1**). Those include retinoic acid and vitamin D receptors, nuclear receptor binding proteins (Nrbp2), Ddif3, Ebf1, and Ebf3 proteins. The inhibition of these genes seems to be an active goal of Rho GTPases, since Rho-transformed cells also promote the expression of Tgif1, a retinoic acid receptor inhibitor (Bertolino *et al.*, 1995). Notably, we also observed a consistent down-modulation of the ID family (ID2, ID3 and ID4), a group of basic helix-loop-helix transcriptional factors involved in matrix remodeling, angiogenesis, and cell proliferation (Norton, 2000) (**Table S1**). Likewise, the mRNA levels of other transcriptional factors usually linked to cell proliferation or tumorigenesis are also reduced in Rho-transformed cells (Stat3, Slug, Mkl1), suggesting that the regulation of transcriptional factors by Rho proteins is more complex than the mere activation of proliferation-related transcriptional regulators. In good agreement to the down-modulation of FGF-Rs, Rho proteins were found to repress Twist1, a transcriptional factor that regulates FGF-R expression.

Consistent with the wide transcriptomal changes induced by Rho GTPases, we

noticed that the transformed cells stimulated a large number of genes encoding proteins related to RNA transcription (RNA polymerases inducers, RNA polymerase II and III subunits, RNA polymerase elongation factors, Cdk8), RNA splicing (Sf365, Slbp, snoRNP complexes), RNA polyadenylation (Cstf2), and RNA export. They also expressed higher levels of molecules involved in the transport of proteins between the nucleus and the cytosol such as structural components of the nuclear pore (nucleoporins 50, 62, 93 and 107), two Ran exchange factors (Chc1, RanGRNF), a Ran GAP, Ran-binding proteins (Nxt1), karyopherins ( $\alpha$ 2,  $\alpha$ 2,  $\beta$ 3, importins 7 and 11), karyopherin-binding proteins (Cse11), and exportins (Xpo1). Concomitant with this process, it is observed an increase in the transcription of genes encoding proteins related to rRNA biogenesis, including transcriptional factors involved in the expression of rRNA polymerases (Rrn3) and rRNA genes (basonuclein), RNA polymerases implicated in rRNA transcription (RNAPol I and E), nucleolar proteins and snoRNPs that participate in pre-rRNA processing, ribosomal factors (Zrf2), and a small fraction of cytosolic (L1, L32) and mitochondrial (L12, L16, L18, L34, S10, S22, and S25) ribosomal proteins (**Table S1**). Coupled with the above processes, we observed that the transcriptome of Rho-transformed cells contained a significant percentage of transcripts encoding factors involved in amino acid anabolism (phosphoserine aminotransferase, serine racemase, branched chain aminotransferase), protein biosynthesis (Eif2b2, Eifs1, Eifes9, Eif4a2, Etf1, Hys- and Arg-tRNA synthetases) and protein folding (10 chaperone-like molecules and heat shock proteins) (**Table S1**). Finally, we also detected a significant number of genes involved in the regulation of proteins at the post-translational level, including 2 prenylation enzymes, 7 ubiquitin-related proteins, 7 proteasomal proteins, 20 serine/threonine kinases, 7 protein tyrosine kinases, and

8 protein phosphatases. With the exception of 13 (26%) of these genes that were down-regulated (*usp22*, *cask*, *clk*, *pftk1*, *eif2ak3*, *srpk2*, *pdgfr- $\alpha$*  and  $\beta$ , *fgf-r1* and 2, *ptprm*, *ppp3ca*, *ptpn13*), all these post-translational factors were elevated in Rho-transformed cells.

Another functional class highly represented in the transcriptome of Rho-transformed cells is that concerned with cell cycle regulation, DNA synthesis, and DNA repair (**Table S1**). This group was mainly composed of up-regulated genes (**Fig. 2a**, **Table S1**). In addition to the expected cell cycle regulators, we observed the expression of a large collection of genes involved in DNA replication such as histones, mediators of histone biosynthesis and/or modification (Slbp, Hat1), topoisomerases (Top2a, Topbp1), helicases, structural components of replication origins (Mcms, Orcs, Cdc45), DNA primases (Prim1, Prim2), DNA polymerases (Pola1, Pola2, Pold1, Pole2) and their regulators (PCNA, Rfc3, Rfc4), DNA ligases (Lig1), and regulators of the coating of nascent DNAs by histones (Asf1b, Chaf1b). Finally, there is a large plethora of genes encoding proteins specialized in DNA repair (**Table S1**). The differential expression of many of these genes in Rho-transformed cells versus the parental counterparts was corroborated at the protein level using immunoblot experiments (**Fig. S4**). To accommodate these high levels of DNA synthesis, we observed the concomitant up- and down-regulation of genes encoding metabolic enzymes involved in the anabolism (phosphoribosyl pyrophosphatase synthetase 1, ribonucleotide reductase, deoxycytidine kinase, adenylate kinase, dihydrofolate reductase, thymidine kinase) and catabolism (xantine dehydrogenase) of nucleotides, respectively (**Table S1**). Other enzymes associated to cell division were also induced by Rho proteins, especially those implicated in the synthesis of polyamines (spermidine synthase, ornithine decarboxylase). The high increase in polyamine synthesis is also



supported by the detection of polyamine-responsive factors such as Pmf1 (**Table S1**).

The analysis of the metabolic pathways specifically targeted in Rho-transformed cells indicates that, in addition to those described already for nucleotide and amino acid biosynthesis, there is an specific modulation of glycolytic enzymes, oxidative stress-counteracting molecules, and of proteins involved in drug resistance and xenobiotic responses (**Table S1**). In the case of glycolysis, we have observed the up-regulation of key regulatory enzymes of the route such as hexokinase 2, phosphoglycerate kinase 1, phosphofructokinase, triosephosphate isomerase, and GADPH. We also observed an elevation in the mRNA levels of lactate dehydrogenase 1, an enzyme involved in the regeneration of glucose from lactate, and of glycerol phosphate dehydrogenase 2, the enzyme involved in the re-oxidation of the NADPH formed in glycolysis. Conversely, we detected diminished levels of Kreb's cycle enzymes (pyruvate dehydrogenase and the subunit C of the succinate dehydrogenase complex), suggesting that the production of energy in Rho-transformed cells shifts from the aerobic to the anaerobic metabolism. It should be noted, however, that such shift is quite idiosyncratic in the case of Rho-transformed cells, since they do not alter the expression of molecules previously shown to be deregulated in cancer cells, such as phosphoglycerate mutase, glucose transporters (Glut1 and 3) or cytochrome c oxidase complex regulators (Sco2) (Chung *et al.*, 1999; Gatenby & Gillies, 2004; Glick *et al.*, 1993; Kondoh *et al.*, 2005; Marom *et al.*, 2001; Matoba *et al.*, 2006; Mochizuki *et al.*, 2001; Sanchez-Alvarez *et al.*, 2005; Tian *et al.*, 2004; Zhao *et al.*, 2005; Zhao *et al.*, 2002).

In addition to the promotion of glycolysis, Rho-transformed cells also up-regulate reducing enzymes whose activity allows the elimination of oxidative radicals (superoxide

dismutase 2, paraoxonase 2, peroxyredoxin 6, thioredoxin reductase 1, thioredoxin 1, glucose-6-phosphate dehydrogenase 2, and transaldolase 1). Furthermore, these cells inhibit the expression of Txnip, a thioredoxin binding protein that decreases the reducing activity of this enzyme. Finally, Rho-transformed cells seem to down-regulate the expression of genes encoding enzymes that eliminate xenobiotics and drugs (i.e., all but one GST isoforms, cytochrome P450, cytochrome b5, UDP glucuronosyl transferase 1). Some of these metabolic routes may be interconnected functionally, because glycolysis has been proposed to act as a potent anti-oxidant factor in cancer cells (Brand, 1997; Brand & Hermfisse, 1997; Gatenby & Gillies, 2004).

The analysis of the Rho-dependent transcriptome has also revealed the deregulation of pathways enhancing the fitness of the cancer cell and, at the same time, pinpointed deficits that may hamper the oncogenic potential of these GTPases in normal cells. Regarding the former issue, we have observed that these GTPases promote the down-modulation of a subset of TGF $\beta$  targets and of anti-mitogenic genes (TGF $\beta$ -related elements, nuclear hormone receptors), the induction of ligands previously shown to collaborate in the metastasis of cancer cells to specific tissues (Cxcl1, epiregulin) (Minn *et al.*, 2005), the inhibition of pathways involved in xenobiotics responses and drug metabolization, the promotion of factors implicated in stromal and inflammatory cell infiltration (CTNF, Cox2/Ptgs2, chemokines) or the enhancement of cancer cell survival strategies (autocrine molecules, PTEN down-modulation, Birc5/Survivin). We have also observed the up-regulation of loci previously involved in the cancerous state (*stm1*, *ssp1/opn*, *msln*, *aqp1 pbx3*, *noll*) and, at the same time, the down-regulation of genes that are lost during tumor progression (*gas*, *aim1*, *sirt2*). Interestingly, the chronic stimulation

of the Rho pathway also leads to the up-regulation of other routes commonly found in cancer cells, such as the induction of enzymes involved in glycolysis and oxidative stress clearance (Gatenby & Gillies, 2004). All these results indicate that the constitutive activation of Rho signaling promotes specific tumorigenic properties *per se* even in the absence of accumulating mutations or intra-tissular selective forces. Despite these proactive changes favoring tumorigenesis, a careful analysis of the Rho-dependent transcriptome disclosed a number of Achilles' heels of the biological program elicited by Rho subfamily proteins. For instance, the examination of the Rho "glycolytic program" indicates that it does not include the Glut1 and Glut3 transporters that may be crucial for maintaining high glycolytic rates under suboptimal glucose concentrations (Gatenby & Gillies, 2004). We have also observed that Rho proteins trigger the up-regulation of p53 and p53-dependent genes (Lats2, Gadd45a, Mdm2). While this may not be an impediment for NIH3T3 cells due to the loss of the *p16* gene (Linardopoulos *et al.*, 1995; Quelle *et al.*, 1995), it may be an insurmountable problem for normal cells having a fully competent p53 route.

As expected from the results discussed in **Section II** (see above), the analysis of the RhoB<sup>Q63L</sup> and RhoC<sup>Q63L</sup>-associated transcriptome generated similar functional distributions.

## REFERENCES

- Amano, M., Ito, M., Kimura, K., Fukata, Y., Chihara, K., Nakano, T., Matsuura, Y. & Kaibuchi, K. (1996). *J Biol Chem*, **271**, 20246-9.
- Belguise, K., Kersual, N., Galtier, F. & Chalbos, D. (2005). *Oncogene*, **24**, 1434-44.
- Benitah, S.A., Valeron, P.F. & Lacal, J.C. (2003). *Mol Biol Cell*, **14**, 3041-54.
- Bentz, H., Nathan, R.M., Rosen, D.M., Armstrong, R.M., Thompson, A.Y., Segarini, P.R., Mathews, M.C., Dasch, J.R., Piez, K.A. & Seyedin, S.M. (1989). *J Biol Chem*, **264**, 20805-10.
- Bertolino, E., Reimund, B., Wildt-Perinic, D. & Clerc, R.G. (1995). *J Biol Chem*, **270**, 31178-88.
- Bowen-Pope, D.F., Vogel, A. & Ross, R. (1984). *Proc Natl Acad Sci U S A*, **81**, 2396-400.
- Brancolini, C., Marzinotto, S. & Schneider, C. (1997). *Cell Death Differ*, **4**, 247-53.
- Brand, K. (1997). *J Bioenerg Biomembr*, **29**, 355-64.
- Brand, K.A. & Hermfisse, U. (1997). *Faseb J*, **11**, 388-95.
- Brooks, C.L. & Gu, W. (2006). *Mol Cell*, **21**, 307-15.
- Chen, C.R., Kang, Y. & Massague, J. (2001). *Proc Natl Acad Sci U S A*, **98**, 992-9.
- Chowdhury, I. & Chaqour, B. (2004). *Eur J Biochem*, **271**, 4436-50.
- Chung, J.K., Lee, Y.J., Kim, C., Choi, S.R., Kim, M., Lee, K., Jeong, J.M., Lee, D.S., Jang,

- J.J. & Lee, M.C. (1999). *J Nucl Med*, **40**, 339-46.
- Coller, H.A., Sang, L. & Roberts, J.M. (2006). *PLoS Biol*, **4**, e83.
- Cully, M., You, H., Levine, A.J. & Mak, T.W. (2006). *Nat Rev Cancer*, **6**, 184-92.
- del Peso, L., Hernandez-Alcoceba, R., Embade, N., Carnero, A., Esteve, P., Paje, C. & Lacal, J.C. (1997). *Oncogene*, **15**, 3047-57.
- Ellis, S. & Mellor, H. (2000). *Trends Cell Biol*, **10**, 85-8.
- Etienne-Manneville, S. & Hall, A. (2002). *Nature*, **420**, 629-35.
- Gagrica, S., Hauser, S., Kolfshoten, I., Osterloh, L., Agami, R. & Gaubatz, S. (2004). *Embo J*, **23**, 4627-38.
- Gampel, A., Parker, P.J. & Mellor, H. (1999). *Curr Biol*, **9**, 955-8.
- Gatenby, R.A. & Gillies, R.J. (2004). *Nat Rev Cancer*, **4**, 891-9.
- Gerald, D., Berra, E., Frapart, Y.M., Chan, D.A., Giaccia, A.J., Mansuy, D., Pouyssegur, J., Yaniv, M. & Mechta-Grigoriou, F. (2004). *Cell*, **118**, 781-94.
- Glick, R.P., Unterman, T.G. & Lacson, R. (1993). *Regul Pept*, **48**, 251-6.
- Han, J.S., Macarak, E., Rosenbloom, J., Chung, K.C. & Chaqour, B. (2003). *Eur J Biochem*, **270**, 3408-21.
- Hata, A., Lagna, G., Massague, J. & Hemmati-Brivanlou, A. (1998). *Genes Dev*, **12**, 186-

97.

Hofer, F., Fields, S., Schneider, C. & Martin, G.S. (1994). *Proc Natl Acad Sci U S A*, **91**, 11089-93.

Jaffe, A.B. & Hall, A. (2005). *Annu Rev Cell Dev Biol*, **21**, 247-69.

Jin, W., Takagi, T., Kaneshashi, S.N., Kurahashi, T., Nomura, T., Harada, J. & Ishii, S. (2006). *Dev Cell*, **10**, 461-71.

Karin, M. (2006). *Nature*, **441**, 431-6.

Kikuchi, A., Demo, S.D., Ye, Z.H., Chen, Y.W. & Williams, L.T. (1994). *Mol Cell Biol*, **14**, 7483-91.

Kimura, K., Ito, M., Amano, M., Chihara, K., Fukata, Y., Nakafuku, M., Yamamori, B., Feng, J., Nakano, T., Okawa, K., Iwamatsu, A. & Kaibuchi, K. (1996). *Science*, **273**, 245-8.

Kimura, M.Y., Hosokawa, H., Yamashita, M., Hasegawa, A., Iwamura, C., Watarai, H., Taniguchi, M., Takagi, T., Ishii, S. & Nakayama, T. (2005). *J Exp Med*, **201**, 397-408.

Kondoh, H., Leonart, M.E., Gil, J., Wang, J., Degan, P., Peters, G., Martinez, D., Carnero, A. & Beach, D. (2005). *Cancer Res*, **65**, 177-85.

Kretschmar, M., Liu, F., Hata, A., Doody, J. & Massague, J. (1997). *Genes Dev*, **11**, 984-95.

- Kretschmar, M. & Massague, J. (1998). *Curr Opin Genet Dev*, **8**, 103-11.
- Kustikova, O., Kramerov, D., Grigorian, M., Berezin, V., Bock, E., Lukanidin, E. & Tulchinsky, E. (1998). *Mol Cell Biol*, **18**, 7095-105.
- Lagna, G., Hata, A., Hemmati-Brivanlou, A. & Massague, J. (1996). *Nature*, **383**, 832-6.
- Lamaze, C., Chuang, T.H., Terlecky, L.J., Bokoch, G.M. & Schmid, S.L. (1996). *Nature*, **382**, 177-9.
- Leung, S.M., Rojas, R., Maples, C., Flynn, C., Ruiz, W.G., Jou, T.S. & Apodaca, G. (1999). *Mol Biol Cell*, **10**, 4369-84.
- Li, J., Yen, C., Liaw, D., Podsypanina, K., Bose, S., Wang, S.I., Puc, J., Miliaris, C., Rodgers, L., McCombie, R., Bigner, S.H., Giovanella, B.C., Ittmann, M., Tycko, B., Hibshoosh, H., Wigler, M.H. & Parsons, R. (1997). *Science*, **275**, 1943-7.
- Linardopoulos, S., Street, A.J., Quelle, D.E., Parry, D., Peters, G., Sherr, C.J. & Baltimore, A. (1995). *Cancer Res*, **55**, 5168-72.
- Liu, F., Hata, A., Baker, J.C., Doody, J., Carcamo, J., Harland, R.M. & Massague, J. (1996). *Nature*, **381**, 620-3.
- Liu, F., Poupponnot, C. & Massague, J. (1997). *Genes Dev*, **11**, 3157-67.
- Maehama, T. & Dixon, J.E. (1998). *J Biol Chem*, **273**, 13375-8.
- Marom, E.M., Aloia, T.A., Moore, M.B., Hara, M., Herndon, J.E., 2nd, Harpole, D.H., Jr.,

- Goodman, P.C. & Patz, E.F., Jr. (2001). *Lung Cancer*, **33**, 99-107.
- Matoba, S., Kang, J.G., Patino, W.D., Wragg, A., Boehm, M., Gavrilova, O., Hurley, P.J., Bunz, F. & Hwang, P.M. (2006). *Science*, **312**, 1650-3.
- Mellor, H., Flynn, P., Nobes, C.D., Hall, A. & Parker, P.J. (1998). *J Biol Chem*, **273**, 4811-4.
- Minn, A.J., Gupta, G.P., Siegel, P.M., Bos, P.D., Shu, W., Giri, D.D., Viale, A., Olshen, A.B., Gerald, W.L. & Massague, J. (2005). *Nature*, **436**, 518-24.
- Miralles, F., Posern, G., Zaromytidou, A.I. & Treisman, R. (2003). *Cell*, **113**, 329-42.
- Miyake, S., Sellers, W.R., Safran, M., Li, X., Zhao, W., Grossman, S.R., Gan, J., DeCaprio, J.A., Adams, P.D. & Kaelin, W.G., Jr. (2000). *Mol Cell Biol*, **20**, 8889-902.
- Mochizuki, T., Tsukamoto, E., Kuge, Y., Kanegae, K., Zhao, S., Hikosaka, K., Hosokawa, M., Kohanawa, M. & Tamaki, N. (2001). *J Nucl Med*, **42**, 1551-5.
- Muller, S.M., Okan, E. & Jones, P. (2000). *Biochem Biophys Res Commun*, **270**, 892-8.
- Myers, M.P., Stolarov, J.P., Eng, C., Li, J., Wang, S.I., Wigler, M.H., Parsons, R. & Tonks, N.K. (1997). *Proc Natl Acad Sci U S A*, **94**, 9052-7.
- Nobes, C.D. & Hall, A. (1995). *Cell*, **81**, 53-62.
- Norton, J.D. (2000). *J Cell Sci*, **113 ( Pt 22)**, 3897-905.
- Ott, C., Iwanciw, D., Graness, A., Giehl, K. & Goppelt-Struebe, M. (2003). *J Biol Chem*,



**278**, 44305-11.

- Perona, R., Esteve, P., Jimenez, B., Ballester, R.P., Ramon y Cajal, S. & Lacal, J.C. (1993). *Oncogene*, **8**, 1285-92.
- Quelle, D.E., Ashmun, R.A., Hannon, G.J., Rehberger, P.A., Trono, D., Richter, K.H., Walker, C., Beach, D., Sherr, C.J. & Serrano, M. (1995). *Oncogene*, **11**, 635-45.
- Rajasekhar, V.K., Viale, A., Socci, N.D., Wiedmann, M., Hu, X. & Holland, E.C. (2003). *Mol Cell*, **12**, 889-901.
- Ray, M.E., Wistow, G., Su, Y.A., Meltzer, P.S. & Trent, J.M. (1997). *Proc Natl Acad Sci U S A*, **94**, 3229-34.
- Ridley, A.J. (2001). *Traffic*, **2**, 303-10.
- Ridley, A.J. & Hall, A. (1992). *Cell*, **70**, 389-99.
- Rodriguez-Viciana, P. & McCormick, F. (2005). *Cancer Cell*, **7**, 205-6.
- Sahai, E., Ishizaki, T., Narumiya, S. & Treisman, R. (1999). *Curr Biol*, **9**, 136-45.
- Sanchez-Alvarez, R., Taberner, A. & Medina, J.M. (2005). *Brain Res*, **1039**, 189-98.
- Sandilands, E., Cans, C., Fincham, V.J., Brunton, V.G., Mellor, H., Prendergast, G.C., Norman, J.C., Superti-Furga, G. & Frame, M.C. (2004). *Dev Cell*, **7**, 855-69.
- Sarasa-Renedo, A., Tunc-Civelek, V. & Chiquet, M. (2006). *Exp Cell Res*, **312**, 1361-70.

- Schuebel, K.E., Movilla, N., Rosa, J.L. & Bustelo, X.R. (1998). *Embo J*, **17**, 6608-21.
- Selvaraj, A. & Prywes, R. (2004). *BMC Mol Biol*, **5**, 13.
- Settleman, J. (2003). *Mol Cell*, **11**, 1121-3.
- Spaargaren, M. & Bischoff, J.R. (1994). *Proc Natl Acad Sci U S A*, **91**, 12609-13.
- Sterner-Kock, A., Thorey, I.S., Koli, K., Wempe, F., Otte, J., Bangsow, T., Kuhlmeier, K.,  
Kirchner, T., Jin, S., Keski-Oja, J. & von Melchner, H. (2002). *Genes Dev*, **16**, 2264-  
73.
- Stice, L.L., Vaziri, C. & Faller, D.V. (1999). *Front Biosci*, **4**, D72-86.
- Sudo, S., Avsian-Kretchmer, O., Wang, L.S. & Hsueh, A.J. (2004). *J Biol Chem*, **279**,  
23134-41.
- Teramoto, H., Malek, R.L., Behbahani, B., Castellone, M.D., Lee, N.H. & Gutkind, J.S.  
(2003). *Oncogene*, **22**, 2689-97.
- Tian, M., Zhang, H., Nakasone, Y., Mogi, K. & Endo, K. (2004). *Eur J Nucl Med Mol  
Imaging*, **31**, 5-12.
- Tkach, V., Tulchinsky, E., Lukanidin, E., Vinson, C., Bock, E. & Berezin, V. (2003).  
*Oncogene*, **22**, 5045-54.
- Vaziri, C. & Faller, D.V. (1996). *J Biol Chem*, **271**, 13642-8.
- Vega, F.M., Sevilla, A. & Lazo, P.A. (2004). *Mol Cell Biol*, **24**, 10366-80.

- Verrecchia, F., Chu, M.L. & Mauviel, A. (2001). *J Biol Chem*, **276**, 17058-62.
- Wang, J.L., Nister, M., Bongcam-Rudloff, E., Ponten, J. & Westermark, B. (1996). *J Cell Physiol*, **166**, 12-21.
- Watnick, R.S., Cheng, Y.N., Rangarajan, A., Ince, T.A. & Weinberg, R.A. (2003). *Cancer Cell*, **3**, 219-31.
- Yuan, R.H., Jeng, Y.M., Chen, H.L., Lai, P.L., Pan, H.W., Hsieh, F.J., Lin, C.Y., Lee, P.H. & Hsu, H.C. (2006). *J Pathol*.
- Zhao, S., Kuge, Y., Mochizuki, T., Takahashi, T., Nakada, K., Sato, M., Takei, T. & Tamaki, N. (2005). *J Nucl Med*, **46**, 675-82.
- Zhao, S., Kuge, Y., Tsukamoto, E., Mochizuki, T., Kato, T., Hikosaka, K., Nakada, K., Hosokawa, M., Kohanawa, M. & Tamaki, N. (2002). *Nucl Med Commun*, **23**, 545-50.

**Inmaculada M. Berenjeno, Fátima Núñez, and Xosé R. Bustelo**

**TRANSCRIPTOMAL PROFILING OF THE CELLULAR  
TRANSFORMATION INDUCED BY Rho SUBFAMILY GTPases**

**SUPPLEMENTARY INFORMATION-2**

**SUPPLEMENTARY MATERIALS AND  
METHODS**

**Plasmids**

Mammalian expression vectors encoding human RhoA<sup>Q63L</sup> (pCEFL-AU5-RhoA<sup>Q63L</sup>), RhoB<sup>Q63L</sup> (pXRB159) or RhoC<sup>Q63L</sup> (pXRB160) proteins have been described before (Schuebel *et al.*, 1998). pCEFL-Myc (encoding an AU5-tagged version of wild type human c-Myc) was provided by Dr. P. Crespo (University of Cantabria-CSIC, Santander, Spain). The expression plasmid pSG-V12-H-Ras (encoding the human *H-ras* oncogene) was provided by J. Downward. pCMV-E2F1 (encoding the wild type human E2F1 protein), pCMV-Rb (encoding wild type human Rb), pECE-ΔCDK-Rb (encoding an HA-epitope tagged version of the human RbΔCDK mutant), and the luciferase reporter plasmid carrying E2F-responsive elements (pGL2E2F-*luc*) were all provided by Dr. M. Malumbres (Centro Nacional de Investigaciones Oncológicas, Madrid, Spain). pCMV-MadMyc (encoding the chimeric Mad/Myc protein that acts as a dominant negative mutant for c-Myc), pP2*luc* (containing the *luciferase* gene under the regulation of the *c-myc* promoter region) and pM4*luc* (containing the *luciferase* gene under the regulation of a promoter with *c-myc* responsive elements) were kindly provided by Dr. J. León (University of Cantabria, Santander, Spain). Luciferase reporter plasmids carrying AP1 (pAP-1-*luc*) and p53 (p53-*luc*) responsive elements were obtained from Stratagene. pTKHyg (containing the *hygromycin* resistance gene) and pRLSV40 (expressing the *Renilla sp* luciferase constitutively) were purchased from Promega. The pCEFL derivative encoding a c-Jun dominant negative mutant was provided by Dr. J.S. Gutkind (National Institutes of Health, Bethesda, MD, USA). The expression vector pIMB15 (containing a Mad/Myc chimera) was generated by subcloning a pCMV-Mad/Myc-derived HindIII/XbaI cDNA fragment into the HindIII/XbaI linearized pCEFL-AU5 vector. pSUPER.GFP/*neo* was provided by

Dr. C. Guerrero (Centro de Investigación del Cáncer, Salamanca, Spain). The pIMB20 plasmid containing the *c-myc* shRNA was generated by ligating into BglII/HindIII-linearized pSUPER.GFP/*neo* two annealed oligonucleotides containing *c-myc* cDNA sense (5'-*GATCCCCGCTCGCCCAAATCCTGTACTTCAAGAGAGTACAGGATTTGGGCGAGCTTTTTGGAAA*-3') and antisense (5'-*AGCTTTTCCAAAAGCTCGCCCAAATCCTGTACTCTCTTGAAGTACAGGATTTGGGCGAGCGGG*-3') sequences, a 9 nucleotide-long spacer to form the hairpin structure (in bold), and sequences for cloning (in italics).

### **Cell lines**

Information about the denomination of all cell lines used in this study can be found in the **List 1** available in page 8 of this Supplemental material.

### **Real-time quantitative RT-PCR**

Exponentially growing cells were lysed and total RNA extracted using the RNeasy kit (Qiagen). RNAs were quantified by loading aliquots into 6000 Nano Chips. Quantitative polynucleotide chain reactions were performed using the QuantiTect SYBR Green RT-PCR kit (Qiagen). 18S rRNA primers were used as controls for both loading and quantitation of relative expression levels of the genes tested. Amplifications were performed using the iCycler machine (Bio-Rad). Raw data were analyzed using the iCycler iQ Optical System software (version 3.0a, Bio-Rad). The sequences of the oligonucleotides used in the PCR amplifications can be found in **List 2** (page 8-11) of this Supplemental material.

**Immunoblotting, immunoprecipitations, and immunofluorescence antibodies**

Exponentially growing cells were washed with chilled PBS and lysed by adding SDS-PAGE sample buffer onto the plates. After boiling and centrifugation, cell extracts were resolved by electrophoresis and transferred onto nitrocellulose filters (Schleicher and Shuell). Membranes were blocked in either 5% non-fat dried milk (when immunoblotted with standard antibodies) or 5% BSA (when using phosphospecific antibodies) in TBS-T (25 mM Tris-HCl [pH 8,0], 150 mM NaCl, 0.1% Tween-20) and then incubated overnight at 4 °C with the appropriate primary antibodies diluted in blocking buffer. After three washes with TBS-T, the membrane was incubated with the appropriate horseradish peroxidase-conjugated secondary antibody (1:5,000 dilution; GE Healthcare Life Biosciences) for 1 h at room temperature. Immunoreacting bands were developed using a standard chemoluminescent method (ECL, GE Healthcare Life Biosciences).

For the immunoprecipitation of HA-Rb $\Delta$ CDK protein, cells from two subconfluent 10-cm diameter dishes were washed with chilled PBS solution and disrupted in 1 ml of lysis buffer containing 10 mM Tris-HCl [pH 8,0], 150 mM NaCl, 1% Triton X-100, and a protease inhibitor mixture (Cøplete, Roche Molecular Biochemicals). Lysates were incubated on ice for 10 min and precleared by centrifugation at 14,000 rpm for 10 min at 4 °C. After supernatant collection and protein concentration determinations (see above), lysates containing equal amounts of proteins were immunoprecipitated for 2 h at 4 °C using anti-HA antibodies (40  $\mu$ g/ml). Gammabind G-Sepharose beads (GE Healthcare Life Biosciences) were then added to the lysates and incubated for 1 h at 4 °C. After washes, the HA-Rb $\Delta$ CDK protein present in the beads was separated electrophoretically, transferred onto nitrocellulose membranes, and revealed by immunoblot analysis using anti-HA

antibodies.

For immunofluorescence experiments, cells grown on poly-L-lysine-coated coverslips were fixed in 3.7% formaldehyde in PBS for 15 min. Cells were then permeabilized once in 0.5% Triton X-100 (Sigma) in PBS for 10 min and thrice in 0.1% Triton X-100 in PBS for 5 min each. After three washes with PBS, cell preparations were blocked in 5% BSA in TBS (25 mM Tris-HCl [pH 8,0], 150 mM NaCl) for 10 min and then stained for 20 min with rhodamine-phalloidin (0.5 U/ml, Molecular Probes) diluted in blocking solution to reveal the F-actin cytoskeleton. In addition, the cell preparations were stained with DAPI (0.2 µg/ml, Sigma) to visualize the nuclei. Immunofluorescence analysis was done using a Zeiss LSM510 confocal microscope and a 63x objective. Microscope images were finally processed for presentation using the Canvas 8 software (8.0.5 version, ACD Systems). Information about the antibodies used in our work can be found in **List 3** of this Supplemental material (pages 11-12).

### **Luciferase reporter assays**

In the case of transcriptional activation assays in stable cell lines, exponentially growing IMB11-1P cells were transfected with pRLSV40 (10 ng) and the appropriate reporter plasmid (1 µg) using a liposome-based method (FuGENE 6, Roche Molecular Biochemicals). In the case of transcriptional activation assays in transient transfections, the pCEFL-AU5-RhoA<sup>Q63L</sup> plasmid (100 ng) was co-transfected with the plasmid mixture indicated above in NIH3T3 cells. 24 h after transfection, cells were washed and maintained in DMEM supplemented with 0.5% calf serum for 24 h. The luciferase activity was assayed using the Dual Reporter Luciferase Assay kit (Promega), as specified by the



manufacturer. The light generated in each reaction was quantified in a luminometer (MiniLumat LB 9506, EG&G Berthold). To avoid spurious inter-sample variability, the values obtained in the luciferase readings were normalized taking into account the levels of the *Renilla* luciferase activity present in each lysate. In addition, each experiment was performed in triplicate at least three independent times.

### **Determination of proliferation rates**

We used the 3-(4,5-dimethylthiazol-2-yl)-2,5-diphenyltetrazolium bromide (MTT) assay (Sigma) to determine the growth properties of our cell lines. To this end, the indicated cell lines were plated in 24-well dishes (10,000 cells/well) and cultured in DMEM supplemented with 10% calf serum. At the indicated time post-plating, the culture medium was discarded and 250  $\mu$ l of an MTT solution in DMEM (0.5 mg/ml) were added onto each well. After 1 hr in a 5% CO<sub>2</sub> atmosphere at 37 °C, the formazan crystals formed were dissolved by adding 500  $\mu$ l of dimethyl sulfoxide (Sigma) onto each well. The absorbance at 570 nm of each sample was measured 15 min later using a microplate reader (Ultraevolution, Tecan).

### **Focus formation assays**

For primary focus formation assays, NIH3T3 cells ( $1.5 \times 10^5$ ) were transfected using the calcium phosphate technique with 0.6  $\mu$ g of pCEFL-AU5-RhoA<sup>Q63L</sup> either alone or in combination of 1  $\mu$ g of the indicated expression vectors. After 15 d, the foci of transformed cells were scored *de visu* by staining the plates with Giemsa (Sigma). For secondary focus formation assays, 1,000 cells of the indicated cell clones were mixed with 30,000 parental

NIH3T3 cells and plated onto 35 mm diameter culture dishes. Cell cultures were maintained for 9 d in DMEM supplemented with 10% calf serum and then stained with Giemsa to visualize the foci of transformed cells. In all cases, the data reported are derived from an experiment performed in duplicate that repeated at least three other independent times.

**List 1.** Cell lines used in this study

| NAME     | ORIGINATED FROM | GENES INTRODUCED                   | TYPE OF SELECTION |
|----------|-----------------|------------------------------------|-------------------|
| IMB11-1P | NIH3T3          | RhoA <sup>Q63L</sup>               | G418              |
| IMB11-2P | NIH3T3          | RhoB <sup>Q63L</sup>               | G418              |
| IMB11-3P | NIH3T3          | RhoC <sup>Q63L</sup>               | G418              |
| 12-3-17  | IMB11-1P        | RhoA <sup>Q63L</sup> + MadMyc      | G418 + Hygromycin |
| 15-2-7   | NIH3T3          | c-Myc                              | G418              |
| 16-2-P3  | IMB11-1P        | RhoA <sup>Q63L</sup> + c-Myc       | G418 + Hygromycin |
| 16-2-1   | IMB11-1P        | RhoA <sup>Q63L</sup> + c-Myc       | G418 + Hygromycin |
| 16-2-48  | IMB11-1P        | RhoA <sup>Q63L</sup> + c-Myc       | G418 + Hygromycin |
| 15-6-35  | IMB11-1P        | RhoA <sup>Q63L</sup> + c-myc RNAsi | G418 + Hygromycin |
| 15-6-69  | IMB11-1P        | RhoA <sup>Q63L</sup> + c-myc RNAsi | G418 + Hygromycin |
| 15-7-11  | IMB11-1P        | RhoA <sup>Q63L</sup> + pSUPER      | G418 + Hygromycin |
| 21-2-20  | IMB11-1P        | RhoA <sup>Q63L</sup> + RbΔCDK      | G418 + Hygromycin |
| 21-3-4   | IMB11-1P        | RhoA <sup>Q63L</sup> + RbΔCDK      | G418 + Hygromycin |
| 21-3-6   | IMB11-1P        | RhoA <sup>Q63L</sup> + RbΔCDK      | G418 + Hygromycin |

**List 2.** Oligonucleotides used in RT-PCR experiments

| GENE         | DIRECTION | OLIGONUCLEOTIDE             |
|--------------|-----------|-----------------------------|
| <i>alcam</i> | Forward   | 5'-ATTGACAAAAGGAACATGGCG-3' |
|              | Reverse   | 5'-ACACCACAGTCGCGTTCCTAC-3' |
| <i>atf5</i>  | Forward   | 5'-CCATGGCATCCCTACTCAAGA-3' |
|              | Reverse   | 5'-AGGTCAAAGGTGGGCAAGG-3'   |
| <i>birc5</i> | Forward   | 5'-GGAGGCTGGCTTCATCCAC-3'   |
|              | Reverse   | 5'-GACAGTGAGGAAGGCGCAG-3'   |
| <i>bnc</i>   | Forward   | 5'-CTGGGAAGGTGCTGGATCAC-3'  |
|              | Reverse   | 5'-GTGGGCGGTACGATGACAG-3'   |
| <i>ccl2</i>  | Forward   | 5'-AAAAACCTGGATCGGAACCAA-3' |
|              | Reverse   | 5'-TGCTTGAGGTGGTTGTGGAA-3'  |
| <i>ccl7</i>  | Forward   | 5'-CTGCTCATAGCCGCTGCTTT-3'  |
|              | Reverse   | 5'-CTTCCCAGGGACACCGACTA-3'  |
| <i>cd44</i>  | Forward   | 5'-ATCCCAACGCTATCTGTGCAG-3' |
|              | Reverse   | 5'-CCATCGAAGGAATTGGGTAGG-3' |
| <i>ctgf</i>  | Forward   | 5'-AGTTTGAGCTTTCTGGCTGCA-3' |
|              | Reverse   | 5'-AGTTGTAATGGCAGGCACAGG-3' |
| <i>cxcl1</i> | Forward   | 5'-AGCCCACTCAAGAATGGTCG-3'  |
|              | Reverse   | 5'-AGTGTTGTCAGAAGCCAGCGT-3' |
| <i>cxcl5</i> | Forward   | 5'-GCGTTGTGTTTGCTTAACCGT-3' |
|              | Reverse   | 5'-TCACAGGAGCTTCTGGATCCA-3' |

| <b>GENE</b>     | <b>DIRECTION</b> | <b>OLIGONUCLEOTIDE</b>            |
|-----------------|------------------|-----------------------------------|
| <i>cxcl12</i>   | Forward          | 5'-AACTGTTGAGCAGGTTGCGAT-3'       |
|                 | Reverse          | 5'-CAAGCAACACCCTTCAAAGCT-3'       |
| <i>cyr61</i>    | Forward          | 5'-TGTGAAGTGCCTCCTTGTGG-3'        |
|                 | Reverse          | 5'-AGGAGCCGCAGTATTTGGG-3'         |
| <i>dap</i>      | Forward          | 5'-GACAAAGCAACATGGGCCTC-3'        |
|                 | Reverse          | 5'-CTTGCCGAGTTCCTGCTAA-3'         |
| <i>dtr</i>      | Forward          | 5'-CTCCACCATCTCGGCTCAAT-3'        |
|                 | Reverse          | 5'-CAAACCGATCCCTGCACTCT-3'        |
| <i>ephrA2</i>   | Forward          | 5'-AGGCCGAGCGCATCTTTAT-3'         |
|                 | Reverse          | 5'-GTCAATCTTGGTGAAGTGGCG-3'       |
| <i>ephrB3</i>   | Forward          | 5'-AGAGTAAAGGCATCGCCTCCA-3'       |
|                 | Reverse          | 5'-TTGTGGTCTCAAACCTCAGCCG-3'      |
| <i>ephrinA1</i> | Forward          | 5'-TGACCGCCACATCGTCTTC-3'         |
|                 | Reverse          | 5'-TGTGTATCGCTCCATGGCTG-3'        |
| <i>ephrinB2</i> | Forward          | 5'-CGAAGTGGCCTTATTCGCAG-3'        |
|                 | Reverse          | 5'-GGCCAGTGTGCTGAGAGACA-3'        |
| <i>epireg</i>   | Forward          | 5'-CCCACCAAATGCTCAACCTTA-3'       |
|                 | Reverse          | 5'-TGATTGGTCCCTTGGCACTT-3'        |
| <i>fh11</i>     | Forward          | 5'-AGCATAGGCGATAAAGCTCCC-3'       |
|                 | Reverse          | 5'-ACCATGCATTCTGGCAAGTTC-3'       |
| <i>figf</i>     | Forward          | 5'-TCTTCAAGCCCCCTGTGTA-3'         |
|                 | Reverse          | 5'-ACAGGCACTAACTCGGGCAC-3'        |
| <i>gas1</i>     | Forward          | 5'-ATCTGCGAATCGGTCAAAGAGA-3'      |
|                 | Reverse          | 5'-CGTCATATTCTTCGTCGTAGTAGTCGT-3' |
| <i>gas2</i>     | Forward          | 5'-CTGCAAGTGCCCAACCAAGT-3'        |
|                 | Reverse          | 5'-GAGCAGATAGCCAGCGAAGGT-3'       |
| <i>gas6</i>     | Forward          | 5'-CAGGAGCGACTGGACACACTT-3'       |
|                 | Reverse          | 5'-GGTCCAGGATTTTCCCGTTT-3'        |
| <i>idb2</i>     | Forward          | 5'-GAAAGCCTTCAGTCCGGTGA-3'        |
|                 | Reverse          | 5'-GGGCACCAGTTCCTTGAGC-3'         |
| <i>idb4</i>     | Forward          | 5'-CTGCAGTGCATATGAACGAC-3'        |
|                 | Reverse          | 5'-AGCAGGGTGAGTCTCCAGC-3'         |
| <i>ier3</i>     | Forward          | TCGGATTATGCGCTGGATCT-3'           |
|                 | Reverse          | GCGTTGCCTTAGAAATCCCA-3'           |
| <i>igf2</i>     | Forward          | 5'-AGATACCCCGTGGGCAAGTT-3'        |
|                 | Reverse          | 5'-GACGATGACGTTTGGCCTCT-3'        |
| <i>c-jun</i>    | Forward          | 5'-CCAAGTGCCGGAAAAGGAA-3'         |
|                 | Reverse          | 5'-ACGTTTGCAACTGCTGCGTTA-3'       |
| <i>kif20A</i>   | Forward          | 5'-ATGCAGCCAAATTCTCAGCC-3'        |
|                 | Reverse          | 5'-ACGTCAGCTTCGTCTTCAGGA-3'       |

| GENE                             | DIRECTION | OLIGONUCLEOTIDE                   |
|----------------------------------|-----------|-----------------------------------|
| <i>lats2</i>                     | Forward   | 5'-CCCCGAAGTTTGGACCTTATC-3'       |
|                                  | Reverse   | 5'-GCCATCTCCTGGTCACATCC-3'        |
| <i>mad4</i>                      | Forward   | 5'-ACAGCTTCAGCGGGAACATC-3'        |
|                                  | Reverse   | 5'-ACAGCTTCAGCGGGAACATC-3'        |
| <i>msln</i>                      | Forward   | 5'-AAGCTGACCGTCATACACCCA-3'       |
|                                  | Reverse   | 5'-CACAAGGTCCATTTGTCTGGC-3'       |
| <i>mt2</i>                       | Forward   | 5'-TCCTGTGCCTCCGATGGAT-3'         |
|                                  | Reverse   | 5'-TGTCGGAAGCCTCTTTGCA-3'         |
| <i>mybl2</i>                     | Forward   | 5'-GACAAAGCAACATGGGCCTC-3'        |
|                                  | Reverse   | 5'-CTTGCCGAGTTCTGCTAA-3'          |
| <i>c-myc</i>                     | Forward   | 5'-CTCCACCATCTCGGCTCAAT-3'        |
|                                  | Reverse   | 5'-CAAACCGATCCCTGCACTCT-3'        |
| <i>nr4a1</i>                     | Forward   | 5'-GGCAAACAAGGATTGCCCT-3'         |
|                                  | Reverse   | 5'-CTTGGGTTTTGAAGGTAGCCG-3'       |
| <i>ogn</i>                       | Forward   | 5'-AATGCCACATGCCTGTTGT-3'         |
|                                  | Reverse   | 5'-TGCAAATCCTTGGCAGTCAG-3'        |
| <i>osf2</i>                      | Forward   | 5'-TTCACGCTCTTTGCTCCAC-3'         |
|                                  | Reverse   | 5'-CTCCTCCAGTGATGGCCTCA-3'        |
| <i>pdc4</i>                      | Forward   | 5'-GGACTCTGGCCGAGGAGACT-3'        |
|                                  | Reverse   | 5'-GCCTGCACCACCTTTCTTTG-3'        |
| <i>pdfgr <math>\alpha</math></i> | Forward   | 5'-ATCACAGAGCTCCCTCGCC-3'         |
|                                  | Reverse   | 5'-ATCGCAGAGTGGGAGCCAC-3'         |
| <i>pdfgr <math>\beta</math></i>  | Forward   | 5'-ATCGCGCCACCTTAATCAAC-3'        |
|                                  | Reverse   | 5'-CCCTCGCAGATGAGCACAT-3'         |
| <i>plaur</i>                     | Forward   | 5'-TACACCCACTGCAATGGTGG-3'        |
|                                  | Reverse   | 5'-GGCACTGATTCATTGGTCCC-3'        |
| <i>plf1</i>                      | Forward   | 5'-TCTTCAAGCCCCCTGTGTA-3'         |
|                                  | Reverse   | 5'-ACAGGCACTAACTCGGGCAC-3'        |
| <i>plf2</i>                      | Forward   | 5'-ATCTGCGAATCGGTCAAAGAGA-3'      |
|                                  | Reverse   | 5'-CGTCATATTCTTCGTCGTAGTAGTCGT-3' |
| <i>plf3</i>                      | Forward   | 5'-CCCTTCTTCGATTCAACCATG-3'       |
|                                  | Reverse   | 5'-TGAGACAAACTGCCGGCTAAT-3'       |
| <i>ptgs1</i>                     | Forward   | 5'-CACAGTGCGGTCCAACCTTAT-3'       |
|                                  | Reverse   | 5'-CTGTTTCTTCCCTTTGGTCCC-3'       |
| <i>ptgs2</i>                     | Forward   | 5'-TAGCCAGCAAAGCCTAGAGCA-3'       |
|                                  | Reverse   | 5'-TCGAAGTTCAGCCTGGCAA-3'         |
| <i>serp2</i>                     | Forward   | 5'-ACATTGTGACCGTGGCCAA-3'         |
|                                  | Reverse   | 5'-GCCCCTGGTCTCATTTTTGAC-3'       |
| <i>six1</i>                      | Forward   | 5'-AAAAAGCAGGTCATCGGAAGC-3'       |
|                                  | Reverse   | 5'-GATACATCATTTTGCCCCAGC-3'       |
| <i>snai2</i>                     | Forward   | 5'-GATGCACATTCGAACCCACAC-3'       |
|                                  | Reverse   | 5'-CAGATGTGCCCTCAGGTTTGA-3'       |

| GENE           | DIRECTION | OLIGONUCLEOTIDE              |
|----------------|-----------|------------------------------|
| <i>sparc</i>   | Forward   | 5'-GCTGGATCAGCACCCCTATTGA-3' |
|                | Reverse   | 5'-TCCTGCTCCTTGATGCCAA-3'    |
| <i>sparc11</i> | Forward   | 5'-GACACCAACTGCAGCTGGAT-3'T  |
|                | Reverse   | 5'-CATTGAGATAGCCGCCATGTT-3'  |
| <i>tcf3</i>    | Forward   | 5'-TCGCCATCTCCAGCACACT-3'    |
|                | Reverse   | 5'-TCTTTGGGTCGATCTCTGGG-3'   |
| <i>thbd</i>    | Forward   | 5'-AGTGAGCCCCACCGACTACC-3'   |
|                | Reverse   | 5'-GCCTTCAGGGCATTACAAA-3'    |
| <i>thbs2</i>   | Forward   | 5'-CAGCCTGGTCTTCATGCTCC-3'   |
|                | Reverse   | 5'-TCAATTGGGCACGGATCAC-3'    |
| <i>timp3</i>   | Forward   | 5'-GAGCTGTTGGAGCCTTGGG-3'    |
|                | Reverse   | 5'-GACCAGAGTGCCAAAGGGC-3'    |
| <i>tnc</i>     | Forward   | 5'-CGGAACTGAATATGGGATTGGT-3' |
|                | Reverse   | 5'-TGTCGTCCAGAAAACGTCAGA-3'  |
| <b>18S</b>     | Forward   | 5'-AACGAACGAGACTCTGGCATG-3'  |
|                | Reverse   | 5'-AATCTCGGGTGGCTGAACCG-3'   |

**List 3.** Antibodies used in this work

| ANTIBODY                        | SOURCE                | SPECIFICITY | DILUTION |
|---------------------------------|-----------------------|-------------|----------|
| Anti-AU5                        | Covance               | Monoclonal  | 1:1000   |
| Anti-CDK1                       | Santa Cruz            | Monoclonal  | 1:500    |
| Anti-Cox2                       | Abcam                 | Polyclonal  | 1:5000   |
| Anti-cyclin A                   | Sigma                 | Monoclonal  | 1:1000   |
| Anti- cyclin B                  | Sigma                 | Monoclonal  | 1:300    |
| Anti- cyclin D1                 | Sigma                 | Monoclonal  | 1:1000   |
| Anti-Dusp1                      | Santa Cruz            | Polyclonal  | 1:200    |
| Anti-HA                         | Covance               | Polyclonal  | 1:1000   |
| Anti-c-Jun                      | Santa Cruz            | Polyclonal  | 1:200    |
| Anti-karioferin $\alpha$        | Transduction Labs     | Monoclonal  | 1:2500   |
| Anti-Mcm2                       | Dr. J. Méndez (CNIO)  | Polyclonal  | 1:1000   |
| Anti-Mcm5                       | Dr. J. Méndez (CNIO)  | Polyclonal  | 1:1000   |
| Anti-Mcm7                       | Dr. J. Méndez (CNIO)  | Polyclonal  | 1:1000   |
| Anti-MLC                        | Cell Signaling        | Monoclonal  | 1:500    |
| Anti-MLC (phosphospecific)      | Cell Signaling        | Polyclonal  | 1:1000   |
| Anti-Myc                        | Santa Cruz            | Monoclonal  | 1:200    |
| Anti-MYPT1                      | Transduction Labs     | Monoclonal  | 1:500    |
| Anti-MYPT1<br>(phosphospecific) | Upstate Biotechnology | Polyclonal  | 1:500    |
| Anti-p53                        | Covance               | Monoclonal  | 1:200    |
| Anti-PDGFR $\alpha$             | Dr. E Santos (CIC)    | Polyclonal  | 1:1000   |

| <b>ANTIBODY</b>           | <b>SOURCE</b>              | <b>SPECIFICITY</b> | <b>DILUTION</b> |
|---------------------------|----------------------------|--------------------|-----------------|
| Anti-PLAUR                | Santa Cruz                 | Polyclonal         | 1:500           |
| Anti-Rad51                | Dr. P. Sansegundo<br>(CIC) | Monoclonal         | 1:1000          |
| Anti-Rb (phosphospecific) | Cell Signaling             | Polyclonal         | 1:1000          |
| Anti-tubulin $\alpha$     | Oncogene                   | Monoclonal         | 1:1000          |

#### **REFERENCES OF THIS ONLINE SECTION**

Schuebel, KE, Movilla, N, Rosa, JL, Bustelo, XR (1998). Phosphorylation-dependent and constitutive activation of Rho proteins by wild-type and oncogenic Vav-2. *Embo J* **17**: 6608-6621.

**Inmaculada M. Berenjeno, Fátima Núñez, and Xosé R. Bustelo**

**TRANSCRIPTOMAL PROFILING OF THE CELLULAR  
TRANSFORMATION INDUCED BY Rho SUBFAMILY GTPases**

**SUPPLEMENTARY INFORMATION-3**

**LEGENDS TO SUPPLEMENTARY  
FIGURES**



**LEGENDS TO SUPPLEMENTARY FIGURES**

**FIGURE S1.** Biological properties of the Rho subfamily-transformed cells used in this study. **(a)** Transforming activity of RhoA<sup>Q63L</sup>, RhoB<sup>Q63L</sup> and Rho<sup>CQ63L</sup> proteins in focus formation assays. **(b)** Phase-contrast microscopy images of NIH3T3 and transformed cell lines expressing the indicated GTPase. **(c)** Status of the F-actin cytoskeleton in the parental NIH3T3 cells and the transformed cell lines expressing the indicated GTPase. **(d)** Total cellular extracts from NIH3T3 and the indicated Rho-transformed cells were immunoblotted with anti-phospho-MLC (upper panel), anti-MLC (middle panel) and anti-tubulin (lower panel) antibodies. p, phospho.

**FIGURE S2.** Histogram showing the number of up- (red) and down-regulated (blue) genes with a given expression fold change value in the Rho-dependent transcriptome compared to that of the parental cell line.

**FIGURE S3.** Immunoblot analysis showing the expression of the indicated proteins (left) in total cellular lysates derived from the indicated cell lines (top).

**FIGURE S4.** Activation of the E2F pathway in Rho-transformed cells. **(a)** Expression of the indicated proteins (left) in NIH3T3, RhoA<sup>Q63L</sup>-, RhoB<sup>Q63L</sup>-, and RhoC<sup>Q63L</sup>-transformed cells. When indicated, lysates were obtained from two independent, exponentially growing cultures (that have been labeled as “1” and “2”). **(b)** Transactivation of E2F promoter activity in stable (left panel) and transiently transfected (right panel) cells, as described in Materials and Methods. In the left panel, the E2F reporter plasmid was transfected in

NIH3T3 or in the indicated transformed cells. In the right panel, NIH3T3 cells were transfected with the E2F reporter plasmid in the absence (Mock) or presence of vectors expressing the indicated oncoproteins. Values are expressed as fold change variations of luciferase activity respect to those found in the appropriate control sample (that was given an arbitrary value of 1) and represent the mean  $\pm$  SD of four independent experiments each of them performed in triplicate. (c) Expression of the indicated E2F targets (left) in NIH3T3, RhoA<sup>Q63L</sup>-, RhoB<sup>Q63L</sup>-, and RhoC<sup>Q63L</sup>-transformed cells.

**FIGURE S5.** Corroboration of Affymetrix data by quantitative RT-PCR. The expression levels of the indicated mRNAs were determined by either microarray (A) or quantitative RT-PCR (Q) experiments in RhoA<sup>Q63L</sup>-transformed cells that were either left untreated (-) or treated (+) with Y27632 for 24 h. Values are expressed as fold change of the appropriate gene respect to the transcript levels found in untreated NIH3T3 cells.

**FIGURE S6.** (a) Determination of c-Myc (upper panel) and Cox2/ Ptgs2 (middle panel) protein levels by immunoblot analysis of total cellular lysates obtained from the indicated cell types (top) that were either untreated (-) or treated (+) with 10  $\mu$ M Y27632 for 24 h (top panel). As a loading control, the same lysates were probed with anti-tubulin antibodies (lower panel). (b) Example of Y27632-regulated genes that are c-Myc-dependent (left panel) and independent (right panel). The expression levels of selected transcripts (bottom) were determined by quantitative RT-PCR in the indicated cell lines. As a control, transcript levels were also determined in RhoA<sup>Q63L</sup>-transformed cells treated with the Y27632 inhibitor for 24 hr. (c) Immunoblot analysis showing the levels of c-Myc (upper panel) and

tubulin (lower panel) proteins in total cellular lysates obtained from the indicated, exponentially growing cell lines (top).

**FIGURE S7.** Characterization of the c-Myc overexpressing cell lines used in this study.

**(a)** Transactivation reporter assays showing the hyperactivation of the c-Myc route in c-Myc-expressing cells. The indicated cell lines (bottom) were transfected with a luciferase reporter plasmid containing a c-Myc-responsive promoter (pM4*luc*) and, after 48 h, levels of promoter activity were determined as indicated in Materials and Methods. Values are expressed as fold change variations of luciferase activity respect to that found in the parental NIH3T3 cell line (that was given an arbitrary value of 1) and represent the mean  $\pm$  SD of three independent experiments each of them performed in triplicate. **(b)** Proliferation curve of c-Myc-expressing cells. The indicated cell lines were subjected to MTT assays as indicated in Materials and Methods. Values represent the mean of a representative experiment performed in triplicate. The arrow indicates the time point in which cells reached 100% confluency.

**Inmaculada M. Berenjeno, Fátima Núñez, and Xosé R. Bustelo**

**TRANSCRIPTOMAL PROFILING OF THE CELLULAR  
TRANSFORMATION INDUCED BY Rho SUBFAMILY GTPases**

**SUPPLEMENTARY INFORMATION-4**

**SUPPLEMENTARY FIGURES**

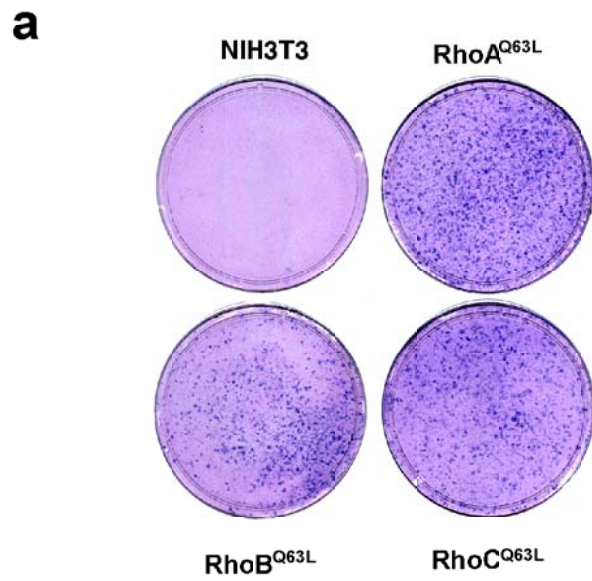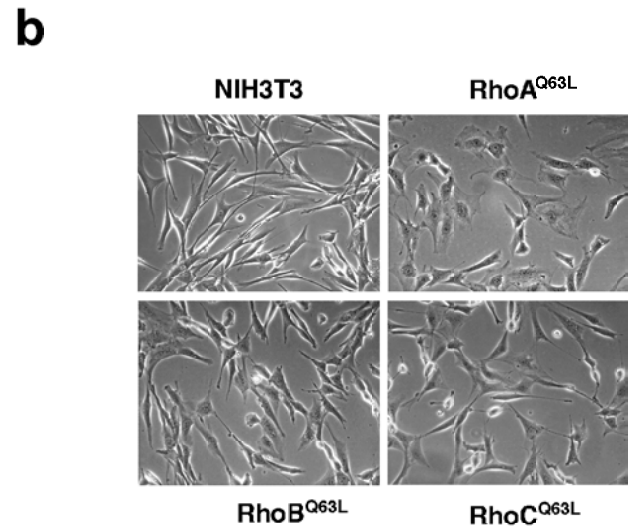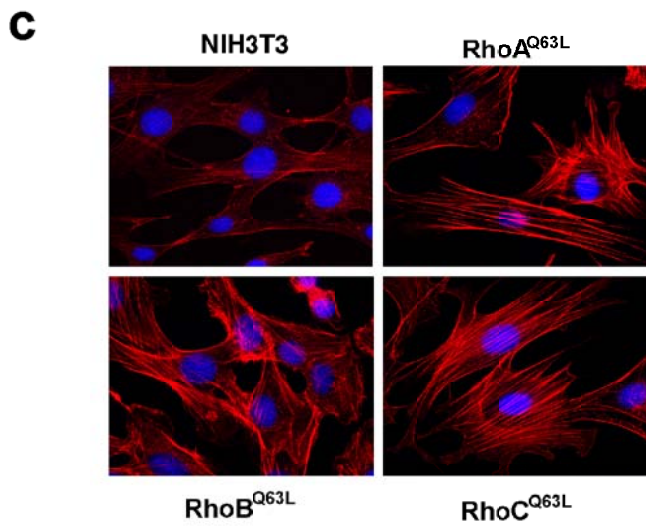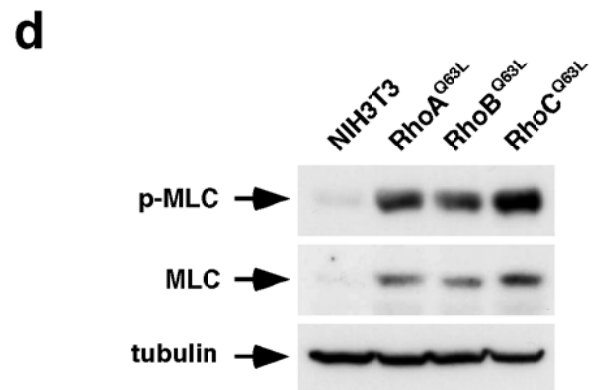

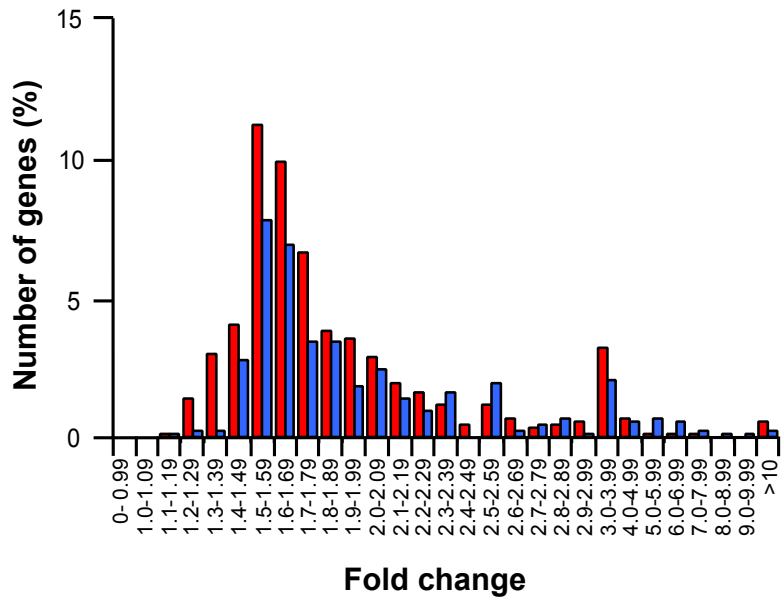

Berenjeno et al.  
Figure S3

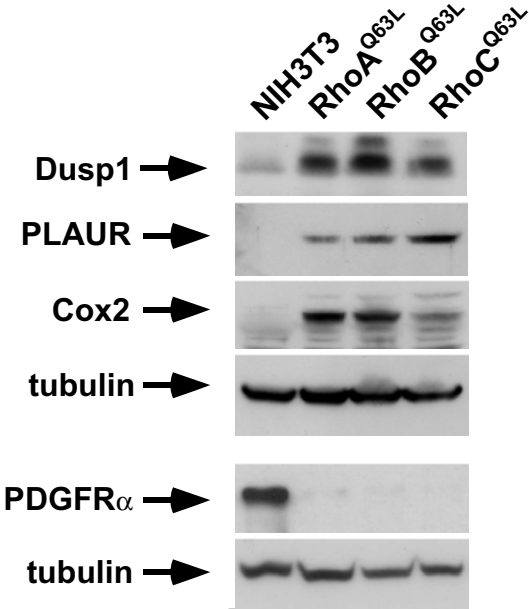

**a**

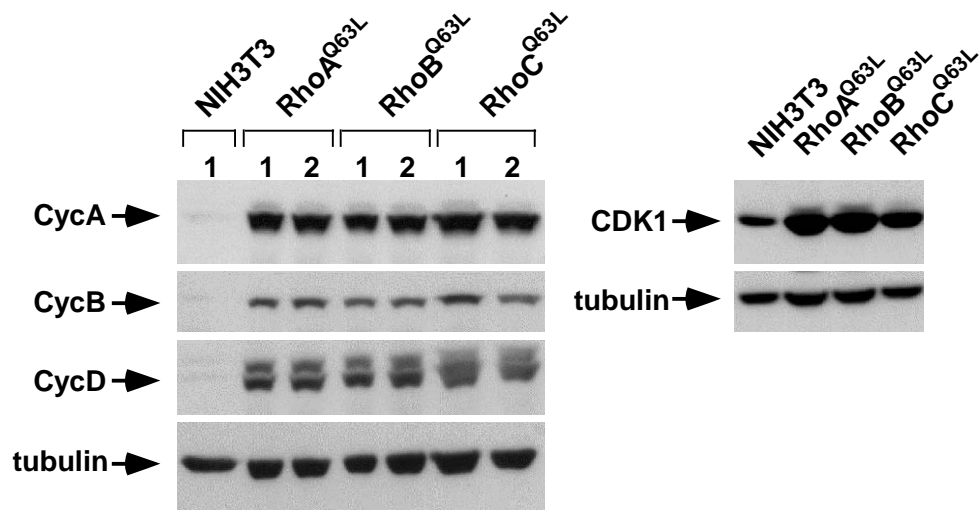

**b**

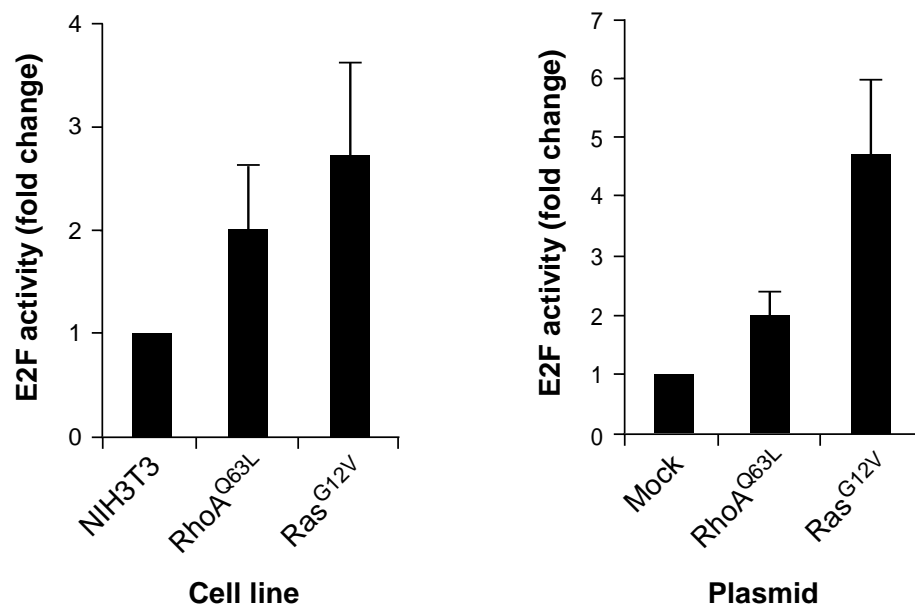

**c**

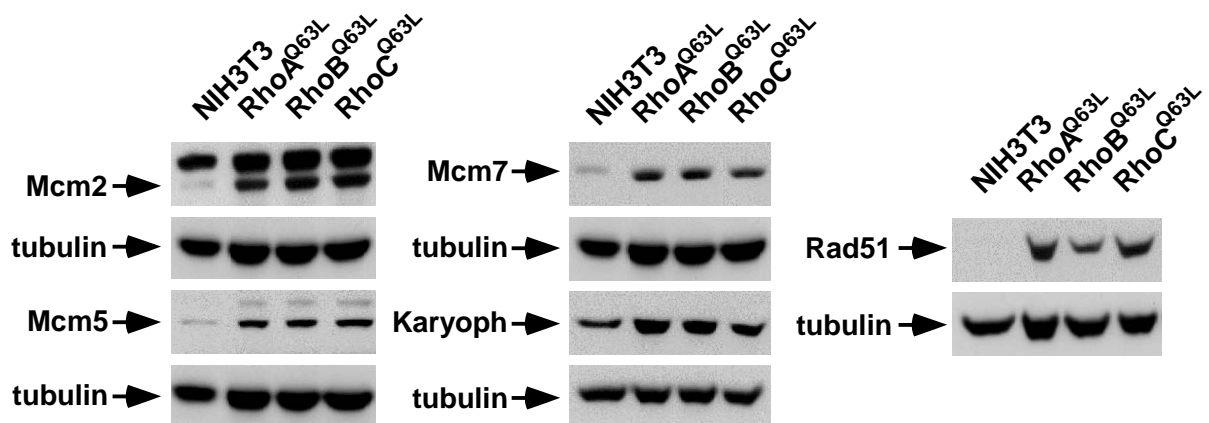



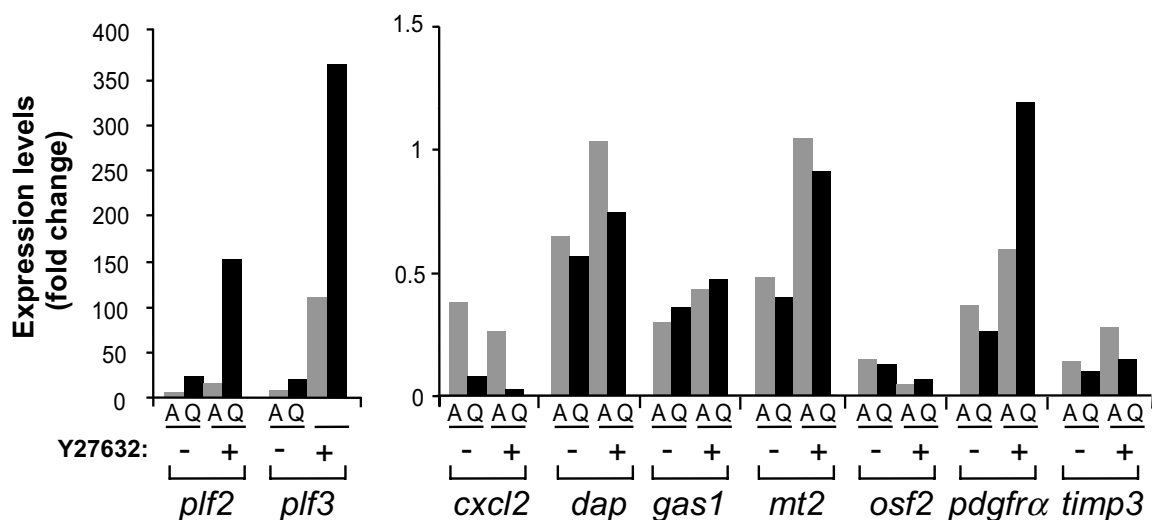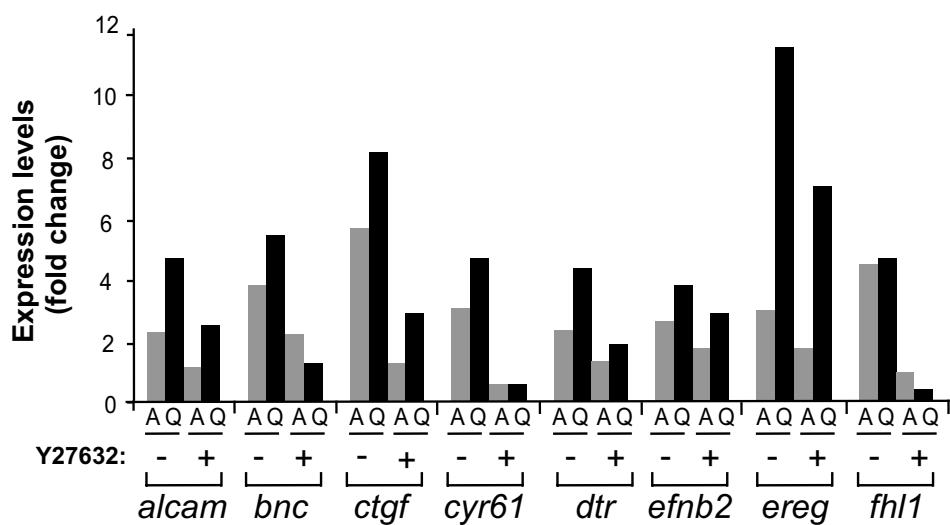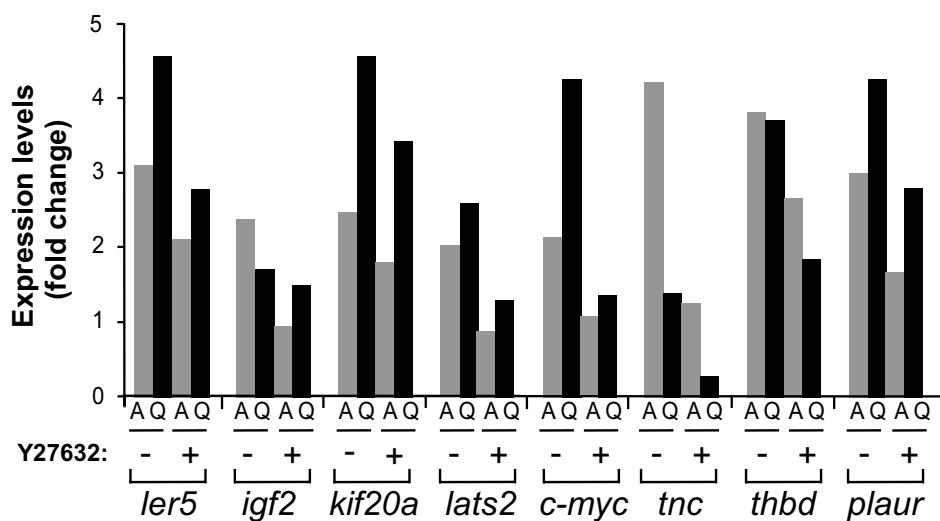

**a**

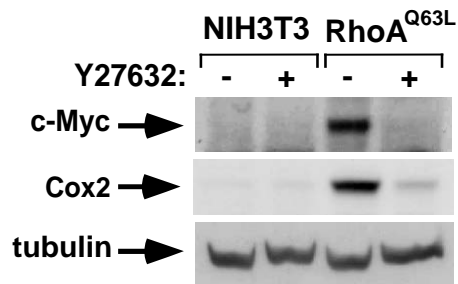

**b**

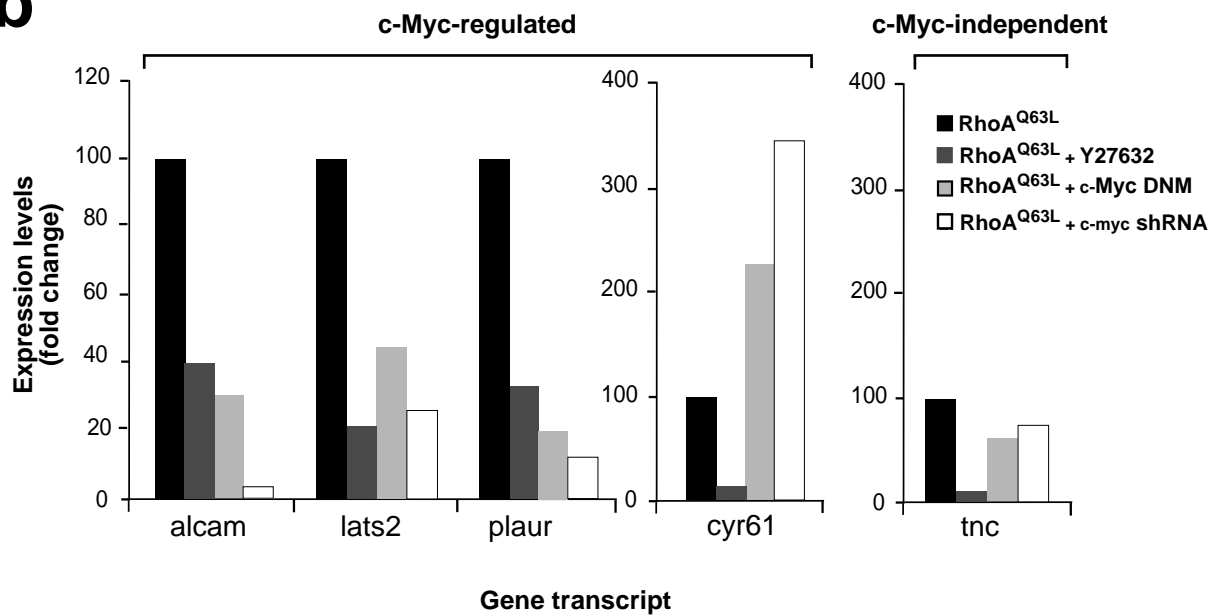

**c**

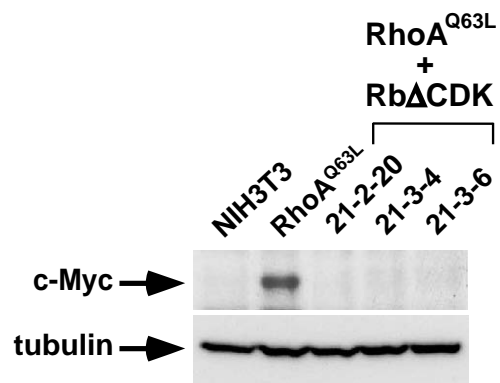

**a**

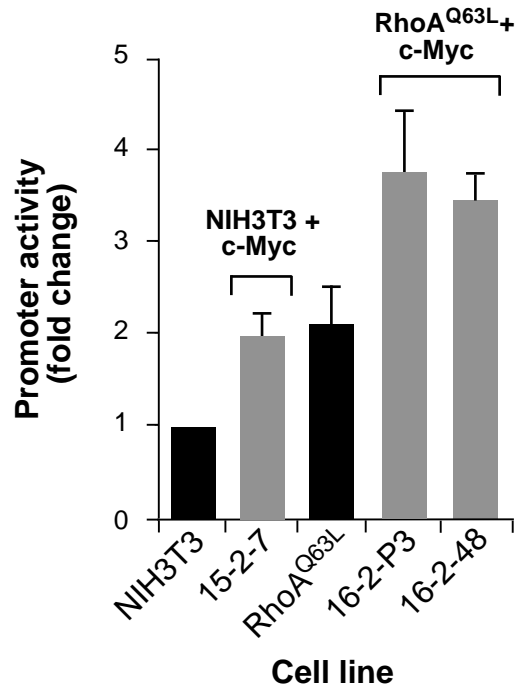

**b**

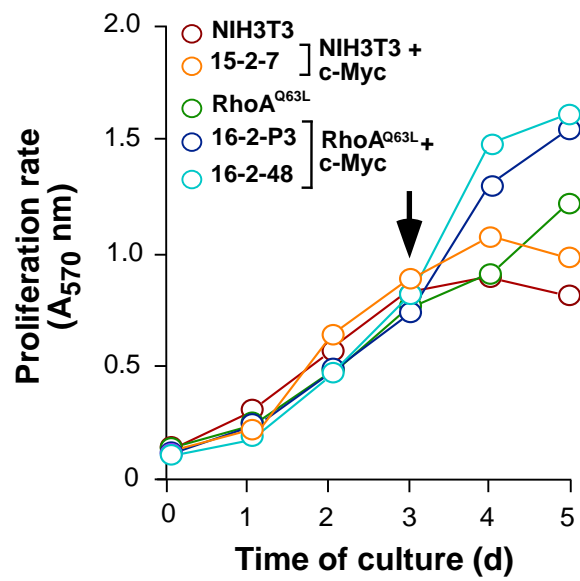

**Inmaculada M. Berenjeno, Fátima Núñez, and Xosé R. Bustelo**

**TRANSCRIPTOMAL PROFILING OF THE CELLULAR  
TRANSFORMATION INDUCED BY Rho SUBFAMILY GTPases**

**SUPPLEMENTARY INFORMATION-5**

**SUPPLEMENTARY TABLES**

**Table S1.** Rho-regulated genes determined by Affymetrix<sup>a</sup>

| Function             | Affy ID     | Locus ID               | Gene symbol    | Description                                               | Fold change <sup>b</sup> | p-value <sup>c</sup>             |
|----------------------|-------------|------------------------|----------------|-----------------------------------------------------------|--------------------------|----------------------------------|
| <b>Extracellular</b> | 95158_at    | <a href="#">12815</a>  | <b>Col11a2</b> | procollagen, type XI, alpha 2                             | 1.66;1.61;1.62           | 8.6535e-06;3.1976e-05;3.1613e-05 |
| Cell adhesion        | 103709_at   | <a href="#">12842</a>  | <b>Col1a1</b>  | procollagen, type I, alpha 1                              | 0.63;0.49;0.6            | 4.8150e-06;7.3389e-09;1.7161e-06 |
|                      | 101130_at   | <a href="#">12843</a>  | <b>Col1a2</b>  | procollagen, type I, alpha 2                              | 0.62;0.53;0.56           | 5.2383e-07;9.5689e-09;4.8811e-08 |
|                      | 161984_f_at | <a href="#">12825</a>  | <b>Col3a1</b>  | procollagen, type III, alpha 1                            | 0.49;0.41;0.32           | 3.9521e-07;1.6707e-08;1.3863e-10 |
|                      | 93220_at    | <a href="#">12830</a>  | <b>Col4a5</b>  | procollagen, type IV, alpha 5                             | 0.5;0.49;0.51            | 9.1625e-12;1.1413e-11;5.1770e-11 |
|                      | 101080_at   | <a href="#">12831</a>  | <b>Col5a1</b>  | procollagen, type V, alpha 1                              | 0.54;0.42;0.47           | 1.2244e-09;3.6022e-12;7.0395e-11 |
|                      | 162459_f_at | <a href="#">12833</a>  | <b>Col6a1</b>  | procollagen, type VI, alpha 1                             | 0.37;0.37;0.32           | 2.7044e-11;5.6861e-11;2.6320e-12 |
|                      | 93517_at    | <a href="#">12834</a>  | <b>Col6a2</b>  | procollagen, type VI, alpha 2                             | 0.29;0.34;0.29           | 1.9136e-15;1.2602e-13;5.2094e-15 |
|                      | 101110_at   | <a href="#">12835</a>  | <b>Col6a3</b>  | procollagen, type VI, alpha 3                             | 0.5;0.4;0.43             | 6.7455e-10;8.7644e-12;4.0416e-11 |
|                      | 100308_at   | <a href="#">12837</a>  | <b>Col8a1</b>  | procollagen, type VIII, alpha 1                           | 1.67;1.71;1.76           | 1.2354e-06;1.3515e-06;5.8649e-07 |
|                      | 92777_at    | <a href="#">16007</a>  | <b>Cyr61</b>   | cysteine rich protein 61                                  | 2.95;1.75;2.68           | 1.6587e-07;0.0013042;1.3989e-06  |
|                      | 92852_at    | <a href="#">14268</a>  | <b>Fn1</b>     | fibronectin 1                                             | 0.73;0.64;0.82           | 1.296e-07;5.864e-10;0.00011902   |
|                      | 99010_at    | <a href="#">26968</a>  | <b>Isir</b>    | immunoglobulin superfamily containing leucine-rich repeat | 0.65;0.64;0.64           | 1.8581e-09;2.0357e-09;2.4319e-09 |
|                      | 92366_at    | <a href="#">16773</a>  | <b>Lama2</b>   | laminin, alpha 2                                          | 0.5;0.45;0.47            | 2.0419e-06;4.3863e-07;1.0124e-06 |
|                      | 104587_at   | <a href="#">16775</a>  | <b>Lama4</b>   | laminin, alpha 4                                          | 0.32;0.33;0.32           | 4.3098e-09;1.3260e-08;9.9677e-09 |
|                      | 101359_at   | <a href="#">16779</a>  | <b>Lamb2</b>   | laminin, beta 2                                           | 0.4;0.36;0.42            | 5.7657e-09;1.5353e-09;2.3808e-08 |
|                      | 100428_at   | <a href="#">16782</a>  | <b>Lamc2</b>   | laminin, gamma 2                                          | 1.58;1.67;1.75           | 3.9991e-11;1.0370e-11;1.7617e-12 |
|                      | 93353_at    | <a href="#">17022</a>  | <b>Lum</b>     | lumican                                                   | 0.42;0.49;0.47           | 5.6833e-10;4.3899e-08;1.4255e-08 |
|                      | 98475_at    | <a href="#">17181</a>  | <b>Matn2</b>   | matrilin 2                                                | 0.19;0.23;0.2            | 8.4601e-14;2.5681e-12;4.3941e-13 |
|                      | 93866_s_at  | <a href="#">17313</a>  | <b>Mglap</b>   | matrix gamma-carboxyglutamate (gla) protein               | 0.35;0.2;0.46            | 1.1442e-14;< 2.22e-16;1.2257e-11 |
|                      | 160118_at   | <a href="#">17387</a>  | <b>Mmp14</b>   | matrix metalloproteinase 14 (membrane-inserted)           | 0.55;0.68;0.75           | 1.0944e-07;8.8945e-05;0.0016156  |
|                      | 102953_at   | <a href="#">56047</a>  | <b>Msln</b>    | mesothelin                                                | 12.99;12.5;12.71         | < 2.22e-16;< 2.22e-16;< 2.22e-16 |
|                      | 100120_at   | <a href="#">18073</a>  | <b>Nid1</b>    | nidogen 1                                                 | 1.38;1.45;1.55           | 3.0231e-05;7.7861e-06;6.5347e-07 |
|                      | 103721_at   | <a href="#">114249</a> | <b>Npnt</b>    | nephronectin                                              | 1.84;0.77;1              | 1.3170e-05;0.031481;0.995676     |

<sup>a</sup> Genes are classified into 19 different functional groups. The Affymetrix identification number (Affy ID), the locus identification number (Locus ID), the symbol and the description for each gene are shown.

Upregulated genes are shown in red and downregulated genes in blue

<sup>b</sup> Fold change in the expression levels compared to NIH3T3 cells. The first, second and third value corresponds to the expression levels obtained in RhoA<sup>Q63L</sup>, RhoB<sup>Q63L</sup> or RhoC<sup>Q63L</sup> expressing cells, respectively.

Values not statistically significant are shown in black

<sup>c</sup> P-values determined with the F-statistic. The first, second and third value corresponds to the expression levels obtained in RhoA<sup>Q63L</sup>, RhoB<sup>Q63L</sup> or RhoC<sup>Q63L</sup> expressing cells, respectively. The same colour code as in a and b is used

| Function        | Affy ID    | Locus ID               | Gene symbol     | Description                                                   | Fold change       | p-value                          |
|-----------------|------------|------------------------|-----------------|---------------------------------------------------------------|-------------------|----------------------------------|
| Extracellular   | 92593_at   | <a href="#">50706</a>  | <b>Osf2</b>     | osteoblast specific factor 2 (fascin1 l-like)                 | 0.15;0.17;0.2     | 3.3611e-09;2.2447e-08;1.3050e-07 |
| Cell adhesion   | 93981_at   | <a href="#">18791</a>  | <b>Plat</b>     | plasminogen activator, tissue                                 | 0.55;0.6;0.57     | 2.8644e-12;1.0508e-10;1.5721e-11 |
|                 | 94147_at   | <a href="#">18787</a>  | <b>Serpine1</b> | serine (or cysteine) proteinase inhibitor, clade E, member 1  | 4.9;2.19;3.68     | 3.8098e-11;1.2708e-05;3.7970e-09 |
|                 | 97487_at   | <a href="#">20720</a>  | <b>Serpine2</b> | serine (or cysteine) proteinase inhibitor, clade E, member 2  | 0.15;0.15;0.15    | 3.6452e-16;8.2546e-16;1.4285e-15 |
|                 | 160319_at  | <a href="#">13602</a>  | <b>Sparcl1</b>  | SPARC-like 1 (mast9, hev1n)                                   | 0.35;0.37;0.33    | 1.4998e-11;1.4221e-10;1.4278e-11 |
|                 | 94930_at   | <a href="#">21826</a>  | <b>Thbs2</b>    | thrombospondin 2                                              | 0.18;0.39;0.4     | 1.0812e-08;0.00016432;0.00024442 |
|                 | 101464_at  | <a href="#">21857</a>  | <b>Timp1</b>    | tissue inhibitor of metalloproteinase 1                       | 1.69;1.32;1.55    | 2.3659e-08;0.00037387;9.8859e-07 |
|                 | 160519_at  | <a href="#">21859</a>  | <b>Timp3</b>    | tissue inhibitor of metalloproteinase 3                       | 0.14;0.22;0.17    | 1.9365e-15;1.3689e-12;4.3599e-14 |
|                 | 101993_at  | <a href="#">21923</a>  | <b>Tnc</b>      | tenascin C                                                    | 4.24;1.35;2.43    | < 2.22e-16;0.00025732;4.8885e-12 |
| Immune response | 95415_f_at | <a href="#">50909</a>  | <b>C1r</b>      | complement component 1, r subcomponent                        | 0.33;0.48;0.42    | 1.2624e-08;1.4808e-05;1.4772e-06 |
|                 | 103335_at  | <a href="#">16859</a>  | <b>Lgals9</b>   | lectin, galactose binding, soluble 9                          | 0.57;0.56;0.68    | 1.4301e-09;2.0131e-09;1.8954e-06 |
|                 | 92731_at   | <a href="#">19288</a>  | <b>Ptx3</b>     | pentaxin related gene                                         | 0.17;0.13;0.17    | < 2.22e-16;< 2.22e-16;< 2.22e-16 |
|                 | 102712_at  | <a href="#">20210</a>  | <b>Saa3</b>     | serum amyloid A 3                                             | 1.86;3.93;4.7     | 0.0002554;4.3627e-09;4.4500e-10  |
| Ligand          | 102736_at  | <a href="#">20296</a>  | <b>Ccl2</b>     | chemokine (C-C motif) ligand 2                                | 19.72;39.82;45.39 | 3.2765e-16;< 2.22e-16;< 2.22e-16 |
|                 | 94761_at   | <a href="#">20306</a>  | <b>Ccl7</b>     | chemokine (C-C motif) ligand 7                                | 6.06;15.92;15.23  | 5.3387e-12;1.5477e-15;2.2014e-15 |
|                 | 98008_at   | <a href="#">20312</a>  | <b>Cx3cl1</b>   | chemokine (C-X3-C motif) ligand 1                             | 0.62;0.49;0.5     | 1.0929e-06;1.9587e-09;4.4194e-09 |
|                 | 95348_at   | <a href="#">14825</a>  | <b>Cxcl1</b>    | chemokine (C-X-C motif) ligand 1                              | 15.85;23.32;26.99 | < 2.22e-16;< 2.22e-16;< 2.22e-16 |
|                 | 100112_at  | <a href="#">20315</a>  | <b>Cxcl12</b>   | chemokine (C-X-C motif) ligand 12                             | 0.38;0.45;0.42    | 7.4791e-08;2.8338e-06;8.5527e-07 |
|                 | 98772_at   | <a href="#">20311</a>  | <b>Cxcl5</b>    | chemokine (C-X-C motif) ligand 5                              | 18.84;42.48;37.19 | < 2.22e-16;< 2.22e-16;< 2.22e-16 |
|                 | 93534_at   | <a href="#">13179</a>  | <b>Dcn</b>      | decorin                                                       | 0.19;0.69;0.43    | 1.2224e-07;0.1243027;0.0012326   |
|                 | 99067_at   | <a href="#">14456</a>  | <b>Gas6</b>     | growth arrest specific 6                                      | 0.24;0.25;0.27    | 1.0374e-09;2.8577e-09;1.0553e-08 |
|                 | 103975_at  | <a href="#">23893</a>  | <b>Grem2</b>    | gremlin 2 homolog, cysteine knot superfamily (Xenopus laevis) | 2.29;1.92;2.24    | 3.8945e-07;2.3012e-05;1.1242e-06 |
|                 | 103904_at  | <a href="#">16012</a>  | <b>Igfbp6</b>   | insulin-like growth factor binding protein 6                  | 1.64;2;1.79       | 1.6195e-07;9.9714e-10;2.4210e-08 |
|                 | 97347_at   | <a href="#">108075</a> | <b>Ltbp4</b>    | latent transforming growth factor beta binding protein 4      | 0.64;0.66;0.68    | 4.9118e-10;3.3674e-09;1.6565e-08 |
|                 | 93929_s_at | <a href="#">26421</a>  | <b>Mrpplf3</b>  | mitogen regulated protein, proliferin 3                       | 7.99;26.72;19.14  | 7.1335e-08;3.2896e-11;2.6731e-10 |
|                 | 104184_at  | <a href="#">18158</a>  | <b>Nppb</b>     | natriuretic peptide precursor type B                          | 1.5;1.44;1.43     | 3.6441e-05;0.00019601;0.00024827 |
|                 | 94838_r_at | <a href="#">18811</a>  | <b>Plf</b>      | proliferin                                                    | 3.6;5.28;4.24     | 3.2443e-06;1.0639e-07;1.0158e-06 |
|                 | 93883_at   | <a href="#">18812</a>  | <b>Plf2</b>     | proliferin 2                                                  | 4.68;12.51;9.72   | 1.0543e-07;2.6305e-11;2.0787e-10 |
|                 | 97519_at   | <a href="#">20750</a>  | <b>Spp1</b>     | secreted phosphoprotein 1                                     | 1.42;1.72;1.39    | 0.00928004;0.00031514;0.01784465 |

| Function        | Affy ID               | Locus ID               | Gene symbol    | Description                                                   | Fold change    | p-value                          |
|-----------------|-----------------------|------------------------|----------------|---------------------------------------------------------------|----------------|----------------------------------|
| Extracellular   | 160469_at             | <a href="#">21825</a>  | <b>Thbs1</b>   | thrombospondin 1                                              | 1.52;0.58;1    | 0.00084988;7.4627e-05;0.98251916 |
|                 | 92782_at              | <a href="#">21917</a>  | <b>Tmpo</b>    | thymopoietin                                                  | 1.64;1.65;1.5  | 2.2406e-05;3.1272e-05;0.00035676 |
|                 | 93188_at              | <a href="#">50781</a>  | <b>Dkk3</b>    | dickkopf homolog 3 ( <i>Xenopus laevis</i> )                  | 0.3;0.31;0.31  | 1.7288e-13;7.2931e-13;8.7559e-13 |
|                 | 102798_at             | <a href="#">11535</a>  | <b>Adm</b>     | adrenomedullin                                                | 1.89;1.64;1.81 | 4.0912e-09;5.9558e-07;2.8267e-08 |
|                 | 160971_at             | <a href="#">107250</a> | <b>Kazald1</b> | Kazal-type serine peptidase inhibitor domain 1                | 0.39;0.43;0.45 | 2.3912e-14;5.6005e-13;1.4655e-12 |
| Other           | 96712_at              | <a href="#">64075</a>  | <b>Smoc1</b>   | SPARC related modular calcium binding 1                       | 1.13;0.86;1.16 | 0.0030364;0.0010609;0.0007709    |
|                 | 96926_at              | <a href="#">64074</a>  | <b>Smoc2</b>   | SPARC related modular calcium binding 2                       | 0.09;0.09;0.11 | < 2.22e-16;5.0635e-16;2.5480e-15 |
| Growth factor   | 102727_at             | <a href="#">12064</a>  | <b>Bdnf</b>    | brain derived neurotrophic factor                             | 2.03;1.77;1.7  | 1.1240e-08;7.9944e-07;2.4193e-06 |
|                 | 93294_at              | <a href="#">14219</a>  | <b>Ctgf</b>    | connective tissue growth factor                               | 5.57;1.95;2.99 | 2.2008e-08;0.0051919;3.7274e-05  |
|                 | 98802_at              | <a href="#">13874</a>  | <b>Ereg</b>    | epiregulin                                                    | 2.93;2.21;1.93 | 2.9250e-12;2.5015e-09;6.5973e-08 |
|                 | 92365_at              | <a href="#">14205</a>  | <b>Figf</b>    | c-fos induced growth factor                                   | 0.18;0.27;0.24 | 1.2160e-09;2.8195e-07;8.2244e-08 |
|                 | 92738_at              | <a href="#">14573</a>  | <b>Gdnf</b>    | glial cell line derived neurotrophic factor                   | 1.59;1.83;2.12 | 4.9002e-08;9.7175e-10;1.3973e-11 |
|                 | 93066_at              | <a href="#">14824</a>  | <b>Grn</b>     | granulin                                                      | 0.48;0.76;0.86 | 9.4165e-08;0.012078;0.148130     |
|                 | 92730_at              | <a href="#">15200</a>  | <b>Hbegf</b>   | heparin-binding EGF-like growth factor                        | 2.27;1.7;1.56  | 2.6118e-08;3.4829e-05;0.00026161 |
|                 | 98623_g_at            | <a href="#">16002</a>  | <b>Igf2</b>    | insulin-like growth factor 2                                  | 2.39;1.31;2    | 1.417e-05;0.11849290;0.00036781  |
|                 | 100277_at             | <a href="#">16323</a>  | <b>Inhba</b>   | inhibin beta-A                                                | 1.96;1.42;1.47 | 9.9861e-08;0.00091070;0.00034676 |
|                 | 102298_at             | <a href="#">18049</a>  | <b>Ngfb</b>    | nerve growth factor, beta                                     | 1.72;1.76;1.52 | 1.4433e-05;1.4601e-05;0.00051859 |
|                 | 160877_at             | <a href="#">18295</a>  | <b>Ogn</b>     | osteoglycin                                                   | 0.09;0.1;0.08  | 2.1240e-15;1.9140e-14;2.4706e-15 |
|                 | 103520_at             | <a href="#">22339</a>  | <b>Vegfa</b>   | vascular endothelial growth factor A                          | 1.67;1.48;1.82 | 3.8054e-07;3.3920e-05;6.1776e-08 |
|                 | 103001_at             | <a href="#">22340</a>  | <b>Vegfb</b>   | vascular endothelial growth factor B                          | 0.6;0.91;0.84  | 1.0113e-06;0.249306;0.045929     |
| Membranes       | 92414_at              | <a href="#">11489</a>  | <b>Adam12</b>  | a disintegrin and metalloproteinase domain 12 (meltrin alpha) | 1.93;1.15;1.24 | 3.0819e-05;0.28868;0.11846       |
| Plasma membrane | 92357_at              | <a href="#">23792</a>  | <b>Adam23</b>  | a disintegrin and metalloproteinase domain 23                 | 0.61;0.57;0.62 | 6.1020e-10;9.0336e-11;2.7461e-09 |
| Cell adhesion   | <a href="#">11658</a> | 104407_a               | <b>Alcam</b>   | activated leukocyte cell adhesion molecule                    | 2.21;1.63;1.06 | 4.8308e-05;0.007017;0.718930     |
|                 | 160271_at             | <a href="#">71668</a>  | <b>Apr-03</b>  | apoptosis related protein ARP3                                | 0.43;0.55;0.55 | 1.5963e-10;1.7711e-07;1.8199e-07 |
|                 | 102327_at             | <a href="#">11754</a>  | <b>Aoc3</b>    | amine oxidase, copper containing 3                            | 0.39;0.34;0.38 | 4.0091e-08;7.5461e-09;5.1364e-08 |
|                 | 102248_f_at           | <a href="#">12361</a>  | <b>Cask</b>    | calcium/calmodulin-dependent serine protein kinase            | 0.69;0.73;0.62 | 3.4591e-07;6.2644e-06;8.5441e-09 |
|                 | 97930_f_at            | <a href="#">12476</a>  | <b>Cd151</b>   | CD151 antigen                                                 | 1.67;1.56;1.55 | 2.3730e-09;6.3082e-08;7.0755e-08 |
|                 | 103005_s_a            | <a href="#">12505</a>  | <b>Cd44</b>    | CD44 antigen                                                  | 3.07;2.69;2.89 | 6.2525e-14;2.0850e-12;5.0465e-13 |
|                 | 103611_at             | <a href="#">16423</a>  | <b>Cd47</b>    | CD47 antigen                                                  | 0.47;0.74;0.64 | 6.2859e-07;0.0162053;0.0010580   |

| Function            | Affy ID               | Locus ID               | Gene symbol    | Description                                                              | Fold change    | p-value                          |
|---------------------|-----------------------|------------------------|----------------|--------------------------------------------------------------------------|----------------|----------------------------------|
| Membranes           | 101560_at             | <a href="#">13723</a>  | <b>Emb</b>     | embigin                                                                  | 0.24;0.26;0.25 | 1.1895e-14;1.0423e-13;5.4760e-14 |
| Plasma membrane     | 104614_at             | <a href="#">14733</a>  | <b>Gpc1</b>    | glypican 1                                                               | 1.79;1.54;1.53 | 5.7515e-09;1.8012e-06;2.2419e-06 |
| Cell adhesion       | 102886_at             | <a href="#">14735</a>  | <b>Gpc4</b>    | glypican 4                                                               | 0.5;0.52;0.48  | 1.8038e-11;1.2639e-10;1.7233e-11 |
|                     | 100759_at             | <a href="#">17534</a>  | <b>Mrc2</b>    | mannose receptor, C type 2                                               | 0.66;0.68;0.73 | 9.4921e-08;6.2691e-07;9.5466e-06 |
|                     | 102663_at             | <a href="#">18793</a>  | <b>Plaur</b>   | urokinase plasminogen activator receptor                                 | 3.02;2;2.41    | 8.8317e-13;1.6303e-08;1.9827e-10 |
|                     | 104256_at             | <a href="#">227929</a> | <b>Pscdbp</b>  | pleckstrin homology, Sec7 and coiled-coil domains, binding protein       | 1.27;1.57;1.3  | 0.00040125;1.7834e-07;0.00030620 |
|                     | 103804_at             | <a href="#">53614</a>  | <b>Reck</b>    | reversion-inducing-cysteine-rich protein with kazal motifs               | 0.46;0.52;0.51 | 2.2025e-10;1.2880e-08;8.4339e-09 |
|                     | 102623_at             | <a href="#">20350</a>  | <b>Sema3f</b>  | semaphorin 3 F                                                           | 0.58;0.59;0.58 | 1.4815e-08;8.2706e-08;3.7262e-08 |
|                     | 96766_s_at            | <a href="#">22174</a>  | <b>Tyro3</b>   | TYRO3 protein tyrosine kinase 3                                          | 1.33;1.53;1.47 | 3.6895e-06;9.8207e-09;4.7676e-08 |
|                     | 101993_at             | <a href="#">21923</a>  | <b>Tnc</b>     | tenascin C                                                               | 4.24;1.35;2.43 | < 2.22e-16;0.00025732;4.8885e-12 |
| Channel-Transporter | 92428_at              | <a href="#">56495</a>  | <b>Asna1</b>   | arsA (bacterial) arsenite transporter, ATP-binding, homolog 1            | 1.41;1.48;1.52 | 1.4205e-08;2.4203e-09;6.4750e-10 |
|                     | 99579_at              | <a href="#">11933</a>  | <b>Atp1b3</b>  | ATPase, Na <sup>+</sup> /K <sup>+</sup> transporting, beta 3 polypeptide | 1.59;1.56;1.65 | 8.6489e-13;4.3771e-12;3.7823e-13 |
|                     | 93330_at              | <a href="#">11826</a>  | <b>Aqp1</b>    | aquaporin 1                                                              | 2.31;3.75;4.03 | 2.0867e-06;2.0822e-09;7.6773e-10 |
|                     | 92445_at              | <a href="#">12286</a>  | <b>Cacna1a</b> | calcium channel, voltage-dependent, P/Q type, alpha 1A subunit           | 0.63;0.64;0.7  | 1.8843e-07;6.5224e-07;1.4835e-05 |
|                     | 101441_i_at           | <a href="#">16442</a>  | <b>Itpr2</b>   | inositol 1,4,5-triphosphate receptor 2                                   | 0.42;0.62;0.47 | 1.0278e-07;0.00065248;1.6525e-06 |
|                     | 104460_at             | <a href="#">12291</a>  | <b>Cacna1g</b> | calcium channel, voltage-dependent, T type, alpha 1G subunit             | 0.66;0.55;0.62 | 8.6320e-09;1.6907e-11;1.9831e-09 |
|                     | 93705_at              | <a href="#">11443</a>  | <b>Chrn1</b>   | cholinergic receptor, nicotinic, beta polypeptide 1 (muscle)             | 1.69;1.59;1.81 | 1.1501e-12;3.6083e-11;2.0945e-13 |
|                     | 102786_at             | <a href="#">12725</a>  | <b>Cicn3</b>   | chloride channel 3                                                       | 1.76;1.71;1.51 | 4.1010e-12;2.8277e-11;4.7588e-09 |
|                     | 104652_at             | <a href="#">16526</a>  | <b>Kcnk2</b>   | potassium channel, subfamily K, member 2                                 | 1.49;1.56;1.61 | 8.2934e-08;3.0311e-08;8.9802e-09 |
|                     | 95586_at              | <a href="#">18438</a>  | <b>P2rx4</b>   | purinergic receptor P2X, ligand-gated ion channel 4                      | 0.47;0.75;0.74 | 3.2470e-07;0.014600;0.013369     |
|                     | 100951_at             | <a href="#">18764</a>  | <b>Pkd2</b>    | polycystic kidney disease 2                                              | 0.44;0.47;0.42 | 2.0114e-11;2.7565e-10;1.5615e-11 |
|                     | 104451_at             | <a href="#">18174</a>  | <b>Slc11a2</b> | solute carrier family 11, member 2                                       | 1.43;1.72;1.82 | 1.8326e-06;3.7213e-09;6.5271e-10 |
|                     | 99500_at              | <a href="#">20496</a>  | <b>Slc12a2</b> | solute carrier family 11, member 2                                       | 0.52;0.57;0.54 | 1.2888e-08;4.0296e-07;6.8034e-08 |
|                     | 92582_at              | <a href="#">20514</a>  | <b>Slc1a7</b>  | solute carrier family 1, member 7                                        | 0.65;0.57;0.63 | 0.00017185;1.0428e-05;9.5481e-05 |
|                     | 95571_at              | <a href="#">22785</a>  | <b>Slc30a4</b> | solute carrier family 30 (zinc transporter), member 4                    | 1.7;1.86;1.58  | 2.1570e-08;2.6108e-09;4.9954e-07 |
|                     | 103527_at             | <a href="#">103710</a> | <b>Slc35e4</b> | solute carrier family 35, member E4                                      | 1.83;1.7;1.73  | 1.5707e-15;5.5595e-14;3.3477e-14 |
|                     | 94433_at              | <a href="#">67760</a>  | <b>Slc38a2</b> | solute carrier family 38, member 2                                       | 0.64;0.6;0.6   | 1.6604e-05;4.3306e-06;3.2893e-06 |
|                     | 99445_at              | <a href="#">68682</a>  | <b>Slc44a2</b> | solute carrier family 44, member 2                                       | 0.61;0.68;0.65 | 4.9437e-06;0.00019027;5.3829e-05 |
|                     | <a href="#">54403</a> | 98457_at               | <b>Slc4a4</b>  | solute carrier family 4 (anion exchanger), member 4                      | 1.54;1.41;1.19 | 1.0420e-06;3.8273e-05;0.01983    |



| Function          | Affy ID     | Locus ID               | Gene symbol             | Description                                                                      | Fold change    | p-value                          |
|-------------------|-------------|------------------------|-------------------------|----------------------------------------------------------------------------------|----------------|----------------------------------|
| Membranes         | 93454_at    | <a href="#">17064</a>  | <a href="#">C1qr1</a>   | complement component 1, q subcomponent, receptor 1                               | 1.71;1.46;1.77 | 9.3130e-11;1.2365e-07;7.0702e-11 |
| Plasma membrane   | 100600_at   | <a href="#">12484</a>  | <a href="#">Cd24a</a>   | CD24a antigen                                                                    | 0.34;0.08;0.28 | 3.7674e-14;< 2.22e-16;1.9236e-15 |
| Immune response   | 93174_at    | <a href="#">102657</a> | <a href="#">Cd276</a>   | CD276 antigen                                                                    | 0.62;0.69;0.74 | 2.2891e-06;0.00014260;0.00122836 |
|                   | 160253_at   | <a href="#">66141</a>  | <a href="#">Fgls</a>    | fragilis                                                                         | 0.56;0.71;0.63 | 4.2852e-06;0.00295734;0.00013444 |
|                   | 101886_f_at | <a href="#">14964</a>  | <a href="#">H2-D1</a>   | histocompatibility 2, D region locus 1                                           | 1.24;1.46;1.68 | 0.00048772;5.0923e-07;2.4914e-09 |
|                   | 98472_at    | <a href="#">15040</a>  | <a href="#">H2-T23</a>  | histocompatibility 2, T region locus 23                                          | 0.48;0.95;0.82 | 8.3716e-07;0.64705;0.10109       |
|                   | 93874_s_at  | <a href="#">16158</a>  | <a href="#">Il11ra2</a> | interleukin 11 receptor, alpha chain 2                                           | 0.23;0.31;0.29 | 2.0847e-13;6.4075e-11;1.9380e-11 |
|                   | 99991_at    | <a href="#">16172</a>  | <a href="#">Il17r</a>   | interleukin 17 receptor                                                          | 0.64;0.68;0.7  | 3.8190e-07;5.5271e-06;1.9021e-05 |
|                   | 98500_at    | <a href="#">17082</a>  | <a href="#">Il1r1</a>   | interleukin 1 receptor-like 1                                                    | 3.17;3.51;3.38 | 5.3829e-10;2.3544e-10;4.3548e-10 |
|                   | 94776_f_at  | <a href="#">16635</a>  | <a href="#">Klra4</a>   | killer cell lectin-like receptor, subfamily A, member 4                          | 2.51;2.12;1.95 | 1.0563e-10;1.0090e-08;7.7322e-08 |
|                   | 93078_at    | <a href="#">110454</a> | <a href="#">Ly6a</a>    | lymphocyte antigen 6 complex, locus A                                            | 0.53;0.85;1.04 | 1.2384e-05;0.20218;0.71851       |
|                   | 103258_at   | <a href="#">17076</a>  | <a href="#">Ly75</a>    | lymphocyte antigen 75                                                            | 1.77;1.47;1.46 | 1.3867e-06;0.00036797;0.00046235 |
|                   | 102649_s_a  | <a href="#">19370</a>  | <a href="#">Raet1c</a>  | retinoic acid early transcript gamma                                             | 1.42;1.53;1.66 | 4.1338e-06;3.8887e-07;2.2230e-08 |
|                   | 100154_at   | <a href="#">21356</a>  | <a href="#">Tapbp</a>   | Tap binding protein                                                              | 0.5;0.88;0.8   | 1.1807e-06;0.256327;0.050242     |
| Ligand            | 160857_at   | <a href="#">13642</a>  | <a href="#">Efnb2</a>   | ephrin B2                                                                        | 2.54;2.32;1.7  | 2.9731e-08;3.2824e-07;0.00018397 |
| Receptor activity | 97733_at    | <a href="#">11541</a>  | <a href="#">Adora2b</a> | adenosine A2b receptor                                                           | 1.68;1.76;1.93 | 6.1353e-12;2.5327e-12;1.1185e-13 |
|                   | 94934_at    | <a href="#">11609</a>  | <a href="#">Agtr2</a>   | angiotensin II receptor, type 2                                                  | 0.16;0.2;0.14  | 4.5468e-12;1.3460e-10;1.6789e-12 |
|                   | 95020_at    | <a href="#">71587</a>  | <a href="#">Cd47</a>    | CD47 antigen (Rh-related antigen, integrin-associated signal transducer)         | 0.45;0.68;0.64 | 2.0462e-07;0.00279598;0.00084421 |
|                   | 93430_at    | <a href="#">12778</a>  | <a href="#">Cmkor1</a>  | chemokine orphan receptor 1                                                      | 3.56;2.62;2.2  | 1.1838e-10;4.1954e-08;1.0792e-06 |
|                   | 100435_at   | <a href="#">14745</a>  | <a href="#">Edg2</a>    | endothelial differentiation, lysophosphatidic acid G-protein-coupled receptor, 2 | 0.51;0.63;0.53 | 3.7466e-09;3.5529e-06;2.4619e-08 |
|                   | 103980_at   | <a href="#">13836</a>  | <a href="#">Epha2</a>   | Eph receptor A2                                                                  | 1.9;1.65;1.71  | 9.0675e-12;2.4336e-09;7.8530e-10 |
|                   | 95313_at    | <a href="#">14062</a>  | <a href="#">F2r</a>     | coagulation factor II (thrombin) receptor                                        | 0.71;0.65;0.78 | 0.00023326;2.6224e-05;0.00548098 |
|                   | 97509_f_at  | <a href="#">14182</a>  | <a href="#">Fgfr1</a>   | Fibroblast growth factor receptor 1                                              | 0.58;0.97;1.02 | 3.8189e-06;0.71358;0.79883       |
|                   | 93090_at    | <a href="#">14183</a>  | <a href="#">Fgfr2</a>   | fibroblast growth factor receptor 2                                              | 0.6;0.58;0.62  | 1.1514e-08;1.1332e-08;1.0514e-07 |
|                   | 161040_at   | <a href="#">14362</a>  | <a href="#">Fzd1</a>    | frizzled homolog 1 (Drosophila)                                                  | 0.53;0.58;0.57 | 5.2194e-08;1.2288e-06;7.8724e-07 |
|                   | 99108_s_at  | <a href="#">14600</a>  | <a href="#">Ghr</a>     | growth hormone receptor                                                          | 0.71;0.64;0.79 | 0.00292282;0.00050885;0.03802902 |
|                   | 99160_s_at  | <a href="#">66168</a>  | <a href="#">Grina</a>   | glutamate receptor, ionotropic, N-methyl D-aspartate-associated protein 1        | 0.42;0.62;0.76 | 7.4826e-07;0.0016845;0.0467210   |
|                   | 104435_at   | <a href="#">242050</a> | <a href="#">Igsf10</a>  | immunoglobulin superfamily, member 10                                            | 0.42;0.45;0.49 | 9.1413e-13;9.5842e-12;7.1809e-11 |
|                   | 94345_at    | <a href="#">71317</a>  | <a href="#">Il6st</a>   | interleukin 6 signal transducer                                                  | 0.54;0.73;0.65 | 5.0875e-07;0.00322937;0.00015192 |
|                   | 95511_at    | <a href="#">16403</a>  | <a href="#">Itga6</a>   | integrin alpha 6                                                                 | 1.76;1.79;1.23 | 3.1527e-06;4.1831e-06;0.047507   |

| Function                   | Affy ID    | Locus ID               | Gene symbol      | Description                                                              | Fold change    | p-value                          |
|----------------------------|------------|------------------------|------------------|--------------------------------------------------------------------------|----------------|----------------------------------|
| <b>Membranes</b>           | 160095_at  | <a href="#">16948</a>  | <b>Lox</b>       | lysyl oxidase                                                            | 0.42;0.35;0.45 | 3.8515e-13;1.5613e-14;4.6066e-12 |
| <b>Plasma membrane</b>     | 103271_at  | <a href="#">16974</a>  | <b>Lrp6</b>      | low density lipoprotein receptor-related protein 6                       | 0.51;0.51;0.48 | 2.9423e-08;4.0671e-08;8.6306e-09 |
| Receptor activity          | 97711_at   | <a href="#">319900</a> | <b>Npr3</b>      | natriuretic peptide receptor 3                                           | 0.42;0.36;0.34 | 1.6366e-05;3.2853e-06;1.9669e-06 |
|                            | 102255_at  | <a href="#">18414</a>  | <b>Osmr</b>      | oncostatin receptor                                                      | 0.68;0.58;0.72 | 0.00096093;3.3678e-05;0.00540438 |
|                            | 95079_at   | <a href="#">18595</a>  | <b>Pdgfra</b>    | platelet derived growth factor receptor, alpha polypeptide               | 0.37;0.53;0.4  | 3.5602e-10;1.9803e-06;3.8701e-09 |
|                            | 160867_at  | <a href="#">18596</a>  | <b>Pdgfrb</b>    | platelet derived growth factor receptor, beta polypeptide                | 0.3;0.34;0.44  | 8.0039e-12;1.7108e-10;1.7713e-08 |
|                            | 96662_at   | <a href="#">68448</a>  | <b>Ppap2b</b>    | phosphatidic acid phosphatase type 2B                                    | 0.49;0.45;0.46 | 2.2888e-07;6.1227e-08;7.8434e-08 |
|                            | 98018_at   | <a href="#">19124</a>  | <b>Procr</b>     | protein C receptor, endothelial                                          | 1.65;1.63;1.75 | 6.0113e-07;1.5948e-06;1.7443e-07 |
|                            | 103362_at  | <a href="#">19219</a>  | <b>Ptger4</b>    | phosphotriesterase related                                               | 1.79;1.38;1.37 | 4.8594e-08;0.00032118;0.00042746 |
|                            | 101932_at  | <a href="#">19267</a>  | <b>Ptpre</b>     | protein tyrosine phosphatase, receptor type, E                           | 1.38;1.48;1.63 | 1.1871e-06;9.7964e-08;2.0210e-09 |
|                            | 99933_at   | <a href="#">19294</a>  | <b>Pvrl2</b>     | poliovirus receptor-related 2                                            | 1.39;1.4;1.63  | 3.2487e-06;4.6883e-06;1.1675e-08 |
|                            | 104423_at  | <a href="#">76843</a>  | <b>Ramp</b>      | retinoic acid-regulated nuclear matrix-associated protein                | 1.99;1.94;1.75 | 9.6417e-06;2.9775e-05;0.00022334 |
|                            | 93503_at   | <a href="#">20319</a>  | <b>Sfrp2</b>     | secreted frizzled-related sequence protein 2                             | 0.15;0.15;0.15 | 4.0426e-13;1.1375e-12;1.1715e-12 |
|                            | 99610_at   | <a href="#">268996</a> | <b>Ss18</b>      | synovial sarcoma translocation, Chromosome 18                            | 1.51;1.29;1.35 | 3.0934e-06;0.00146876;0.00024708 |
|                            | 94643_at   | <a href="#">21332</a>  | <b>Taa1</b>      | tumor-associated antigen 1                                               | 1.56;1.51;1.91 | 4.1432e-07;2.3913e-06;1.3307e-09 |
|                            | 104601_at  | <a href="#">21824</a>  | <b>Thbd</b>      | thrombomodulin                                                           | 3.84;2.86;3.65 | 2.3096e-12;7.2315e-10;1.2037e-11 |
|                            | 98304_at   | <a href="#">21899</a>  | <b>Tlr6</b>      | toll-like receptor 6                                                     | 0.65;0.62;0.67 | 7.1843e-09;2.2128e-09;4.6808e-08 |
|                            | 102887_at  | <a href="#">18383</a>  | <b>Tnfrsf11b</b> | tumor necrosis factor receptor superfamily, member 11b (osteoprotegerin) | 0.62;0.57;0.61 | 4.2540e-08;8.5958e-09;7.6442e-08 |
|                            | 103957_at  | <a href="#">22042</a>  | <b>Trfr</b>      | transferrin receptor                                                     | 3.49;2.52;2.69 | 1.1594e-11;8.3820e-09;2.3970e-09 |
| <b>Receptor binding</b>    | 160320_at  | <a href="#">20411</a>  | <b>Sorbs1</b>    | sorbin and SH3 domain containing 1                                       | 1.82;1.15;1.38 | 0.00016606;0.30982869;0.02911455 |
| Signal transducer activity | 93498_s_at | <a href="#">11804</a>  | <b>Aplp2</b>     | amyloid beta (A4) precursor-like protein 2                               | 0.47;0.53;0.57 | 2.1236e-07;4.1639e-06;2.5069e-05 |
|                            | 99598_g_at | <a href="#">14678</a>  | <b>Gnai2</b>     | guanine nucleotide binding protein, alpha inhibiting 2                   | 0.65;0.8;0.78  | 1.1448e-06;0.0035726;0.0015992   |
|                            | 96865_at   | <a href="#">17118</a>  | <b>Marcks</b>    | myristoylated alanine rich protein kinase C substrate                    | 0.25;0.24;0.21 | 7.5409e-12;1.1258e-11;1.4668e-12 |
|                            | 102395_at  | <a href="#">18858</a>  | <b>Pmp22</b>     | peripheral myelin protein                                                | 0.15;0.22;0.2  | 2.5425e-16;5.0655e-14;1.5998e-14 |
|                            | 100607_at  | <a href="#">18807</a>  | <b>Pld3</b>      | phospholipase D3                                                         | 0.49;0.6;0.62  | 1.3060e-08;3.8685e-06;1.1478e-05 |
|                            | 92309_i_at | <a href="#">19274</a>  | <b>Ptprm</b>     | protein tyrosine phosphatase, receptor type, M                           | 0.46;0.47;0.5  | 3.1944e-09;9.9684e-09;3.4540e-08 |
|                            | 92871_at   | <a href="#">20338</a>  | <b>Sel1h</b>     | Sel1 (suppressor of lin-12) 1 homolog (C. elegans)                       | 0.62;0.66;0.63 | 3.4418e-06;4.1084e-05;1.1992e-05 |
|                            | 99057_at   | <a href="#">21838</a>  | <b>Thy1</b>      | thymus cell antigen 1, theta                                             | 1.54;1.08;1.37 | 1.1915e-07;0.19915;2.4894e-05    |

| Function                      | Affy ID                           | Locus ID               | Gene symbol     | Description                                                      | Fold change    | p-value                          |
|-------------------------------|-----------------------------------|------------------------|-----------------|------------------------------------------------------------------|----------------|----------------------------------|
| <b>Membranes</b>              | 95531_at                          | <a href="#">319434</a> | <b>Amot</b>     | angiominin                                                       | 0.53;0.45;0.52 | 7.1799e-08;2.1845e-09;8.9984e-08 |
| <b>Plasma membrane</b>        | 96037_at                          | <a href="#">55950</a>  | <b>Bri3</b>     | brain protein I3                                                 | 0.63;0.91;0.91 | 1.9904e-06;0.21753;0.23279       |
| Other                         | 101047_at                         | <a href="#">66478</a>  | <b>Cd99</b>     | CD99 antigen                                                     | 0.61;0.71;0.78 | 3.1590e-08;2.3602e-05;0.00085775 |
|                               | <a href="#">100064_f_at_14609</a> | <a href="#">Gja1</a>   |                 | gap junction membrane channel protein alpha 1                    | 4.68;3.61;3.12 | 2.4259e-09;1.3027e-07;8.9438e-07 |
|                               | 101123_at                         | <a href="#">16432</a>  | <b>Itn2b</b>    | integral membrane protein 2B                                     | 0.43;0.6;0.54  | 4.8606e-10;3.6263e-06;2.9641e-07 |
|                               | 96283_at                          | <a href="#">64294</a>  | <b>Itn2c</b>    | integral membrane protein 2C                                     | 0.6;0.74;0.78  | 8.9904e-11;2.5230e-06;2.8265e-05 |
|                               | 97885_at                          | <a href="#">65963</a>  | <b>Lr8</b>      | LR8 protein                                                      | 1.31;1.92;1.93 | 0.0016063;2.4227e-08;1.9217e-08  |
|                               | 104523_at                         | <a href="#">100604</a> | <b>Lrrc8c</b>   | leucine rich repeat containing 8 family, member C                | 2.1;1.63;1.66  | 4.4635e-10;1.3039e-06;6.7045e-07 |
|                               | 100633_at                         | <a href="#">67247</a>  | <b>Mosc2</b>    | MOCO sulphurase C-terminal domain containing 2                   | 0.46;0.64;0.61 | 2.3729e-09;2.2456e-05;6.7897e-06 |
|                               | 94047_at                          | <a href="#">56700</a>  | <b>NCU-G1</b>   | Kidney predominant protein NCU-G1                                | 0.62;0.9;1     | 7.4868e-06;0.22294;0.96271       |
|                               | 102839_at                         | <a href="#">22038</a>  | <b>Plscr1</b>   | phospholipid scramblase 1                                        | 1.37;2;1.98    | 3.6234e-06;5.1811e-12;7.6045e-12 |
|                               | 160373_i_at                       | <a href="#">20324</a>  | <b>Sdpr</b>     | serum deprivation response                                       | 3.58;3.05;3.37 | 2.4476e-16;1.1490e-14;1.7535e-15 |
|                               | 95387_f_at                        | <a href="#">20352</a>  | <b>Sema4b</b>   | semaphorin 4B                                                    | 1.51;1.74;1.49 | 2.3748e-06;3.9538e-08;6.4274e-06 |
|                               | 103078_at                         | <a href="#">232086</a> | <b>TM6P1</b>    | fasting-inducible integral membrane protein TM6P1                | 0.42;0.55;0.65 | 5.6158e-09;4.7544e-06;0.00023151 |
|                               | 103402_at                         | <a href="#">67623</a>  | <b>Tm7sf3</b>   | transmembrane 7 superfamily member 3                             | 0.48;0.58;0.54 | 5.5420e-10;1.7156e-07;3.1307e-08 |
|                               | 100039_at                         | <a href="#">56530</a>  | <b>Tmem4</b>    | transmembrane protein 4                                          | 0.65;0.76;0.75 | 2.8418e-07;0.00030185;0.00012958 |
|                               | 100477_at                         | <a href="#">56277</a>  | <b>Tmem45a</b>  | transmembrane protein 45a                                        | 0.48;0.62;0.51 | 2.9436e-10;9.6571e-07;4.2276e-09 |
|                               | 95477_at                          | <a href="#">76287</a>  | <b>Tmem59</b>   | transmembrane protein 59                                         | 0.64;0.73;0.72 | 1.5247e-05;0.00100594;0.00060083 |
|                               | 95137_at                          | <a href="#">69071</a>  | <b>Tmem97</b>   | transmembrane protein 97                                         | 1.93;1.42;1.53 | 4.5659e-10;2.8875e-05;1.7368e-06 |
| <b>Mitochondrial membrane</b> | 97472_at                          | <a href="#">20524</a>  | <b>Slc25a17</b> | solute carrier family 25, member 17                              | 0.59;0.57;0.52 | 8.8216e-12;5.3968e-12;2.4820e-13 |
|                               | 96849_at                          | <a href="#">30058</a>  | <b>Timm8a</b>   | chloride intracellular channel 4 (mitochondrial)                 | 3.29;2.96;2.44 | 2.6034e-09;3.0126e-08;7.6950e-07 |
|                               | 95441_at                          | <a href="#">53600</a>  | <b>Timm23</b>   | translocase of inner mitochondrial membrane 23 homolog (yeast)   | 1.52;1.42;1.36 | 7.0124e-08;2.4525e-06;1.2624e-05 |
|                               | 160653_at                         | <a href="#">53333</a>  | <b>Tomm40</b>   | translocase of outer mitochondrial membrane 40 homolog (yeast)   | 1.6;1.47;1.42  | 4.7284e-09;3.2255e-07;1.3076e-06 |
|                               | 95432_f_at                        | <a href="#">28185</a>  | <b>Tomm70a</b>  | translocase of outer mitochondrial membrane 70 homolog A (yeast) | 1.54;1.3;1.16  | 1.4928e-06;0.0011160;0.0465923   |
| <b>Nuclear membrane</b>       | 101083_s_a                        | <a href="#">114584</a> | <b>Clic1</b>    | chloride intracellular channel 1                                 | 1.63;1.72;1.69 | 2.5406e-07;8.1238e-08;1.4025e-07 |
|                               | 160890_at                         | <a href="#">98386</a>  | <b>Lbr</b>      | lamin B receptor                                                 | 1.56;1.35;1.23 | 4.5351e-05;0.0033662;0.0390313   |
|                               | 93046_at                          | <a href="#">69508</a>  | <b>Nup50</b>    | nucleoporin 50                                                   | 1.5;1.32;1.22  | 8.606e-06;0.0011536;0.0117265    |
|                               | 160167_at                         | <a href="#">18226</a>  | <b>Nup62</b>    | nucleoporin 62                                                   | 1.54;1.49;1.38 | 5.8644e-09;5.5332e-08;1.5223e-06 |
|                               | 102412_at                         | <a href="#">103468</a> | <b>Nup107</b>   | nucleoporin 107                                                  | 1.58;1.43;1.32 | 1.6684e-07;1.2493e-05;0.00026259 |

| Function         | Affy ID                | Locus ID               | Gene symbol                          | Description                                                              | Fold change                     | p-value                          |
|------------------|------------------------|------------------------|--------------------------------------|--------------------------------------------------------------------------|---------------------------------|----------------------------------|
| Nuclear membrane | 98975_at               | <a href="#">71805</a>  | <b>Nup93</b>                         | nucleoporin 93                                                           | 1.91;1.88;1.62                  | 5.6049e-06;1.4348e-05;0.00032123 |
| Cytoskeleton     | 103574_at              | <a href="#">226251</a> | <b>Ablim1</b>                        | actin-binding LIM protein 1                                              | 0.35;0.47;0.42                  | 1.6755e-09;9.5934e-07;1.3626e-07 |
|                  | 100381_at              | <a href="#">11459</a>  | <b>Acta1</b>                         | actin, alpha 1, skeletal muscle                                          | 1.9;1.26;1.67                   | 4.1831e-06;0.05085172;0.00014500 |
|                  | 95705_s_at             | <a href="#">11461</a>  | <b>Actb</b>                          | actin, beta, cytoplasmic                                                 | 0.39;0.66;0.56                  | 4.7122e-05;0.046135;0.007920     |
|                  | 93102_f_at             | <a href="#">11468</a>  | <b>Actg2</b>                         | actin, gamma 2, smooth muscle, enteric                                   | 1.68;1.02;1.26                  | 3.731e-05;0.884285;0.040829      |
|                  | 95659_at               | <a href="#">56456</a>  | <b>Actl6a</b>                        | actin-like 6A                                                            | 1.99;1.86;1.67                  | 1.5282e-06;1.1439e-05;0.00013121 |
|                  | 104578_f_at            | <a href="#">109711</a> | <b>Actn1</b>                         | actinin, alpha 1                                                         | 1.52;1.32;1.41                  | 3.3192e-07;0.00016254;1.3289e-05 |
|                  | 96343_at               | <a href="#">60595</a>  | <b>Actn4</b>                         | actinin alpha 4                                                          | 1.76;1.4;1.34                   | 6.3861e-08;0.00017703;0.00072491 |
|                  | 98476_at               | <a href="#">11735</a>  | <b>Ank3</b>                          | ankyrin 3, epithelial                                                    | 0.61;0.59;0.48                  | 7.8937e-10;5.2048e-10;9.7272e-13 |
|                  | 96784_at               | <a href="#">68743</a>  | <b>Anln</b>                          | anillin, actin binding protein                                           | 3.12;3.01;2.57                  | 5.8447e-07;1.7841e-06;1.6002e-05 |
|                  | 102632_at              | <a href="#">12316</a>  | <b>Calmbp1</b>                       | calmodulin binding protein 1                                             | 1.55;1.63;1.55                  | 0.0018509;0.0010772;0.0025617    |
|                  | 160106_at              | <a href="#">12332</a>  | <b>Capg</b>                          | capping protein (actin filament), gelsolin-like                          | 1.22;1.79;1.64                  | 0.00092273;1.7753e-10;3.7437e-09 |
|                  | 97549_at               | <a href="#">12632</a>  | <b>Cfl2</b>                          | cofilin 2, muscle                                                        | 2.08;1.95;1.93                  | 4.5844e-11;5.9359e-10;8.1621e-10 |
|                  | 104322_at              | <a href="#">80986</a>  | <b>Ckap2</b>                         | cytoskeleton associated protein 2                                        | 2.16;2.11;2.06                  | 4.2995e-06;1.1430e-05;1.8293e-05 |
|                  | 160150_f_at            | <a href="#">71994</a>  | <b>Cnn3</b>                          | calponin 3, acidic                                                       | 0.69;0.65;0.64                  | 1.7754e-05;4.0155e-06;2.5305e-06 |
|                  | 98107_at               | <a href="#">23790</a>  | <b>Coro1c</b>                        | coronin, actin binding protein 1C                                        | 1.44;1.52;1.42                  | 6.0801e-11;8.4057e-12;3.2078e-10 |
|                  | 92608_at               | <a href="#">13007</a>  | <b>Csrp1</b>                         | cysteine and glycine-rich protein 1                                      | 0.71;0.63;0.9                   | 5.7313e-05;1.6046e-06;0.14028    |
|                  | 94299_at               | <a href="#">69654</a>  | <b>Dctn2</b>                         | dynactin 2                                                               | 0.65;0.79;0.81                  | 3.6275e-06;0.0031723;0.0076335   |
|                  | 100472_at              | <a href="#">17987</a>  | <b>Enah</b>                          | enabled homolog (Drosophila)                                             | 0.59;0.71;0.61                  | 5.8579e-08;7.9910e-05;3.2683e-07 |
|                  | 95637_at               | <a href="#">286940</a> | <b>Flnb</b>                          | filamin, beta                                                            | 1.83;1.47;1.87                  | 1.9902e-08;3.1897e-05;2.3262e-08 |
|                  | 92838_at               | <a href="#">14086</a>  | <b>Fscn1</b>                         | fascin homolog 1, actin bundling protein (Strongylocentrotus) purpuratus | 0.6;0.64;0.62                   | 7.1422e-09;1.4386e-07;7.2841e-08 |
|                  | 96869_at               | <a href="#">56486</a>  | <b>Gabarap</b>                       | gamma-aminobutyric acid receptor associated protein                      | 0.42;0.63;0.65                  | 2.8889e-09;7.6758e-05;0.00022146 |
|                  | 94813_at               | <a href="#">14451</a>  | <b>Gas1</b>                          | growth arrest specific 1                                                 | 0.3;0.36;0.27                   | 5.7029e-15;7.0592e-13;3.8083e-15 |
|                  | 94338_g_at             | <a href="#">14453</a>  | <b>Gas2</b>                          | growth arrest specific 2                                                 | 0.61;0.52;0.46                  | 0.00025001;1.5063e-05;9.6512e-07 |
|                  | 93750_at               | <a href="#">227753</a> | <b>Gsn</b>                           | gelsolin                                                                 | 0.6;0.68;0.73                   | 7.5197e-10;3.1229e-07;4.4329e-06 |
|                  | 94826_at               | <a href="#">16418</a>  | <b>Itgb4bp</b>                       | integrin beta 4 binding protein                                          | 1.66;1.67;1.5                   | 2.9058e-08;4.4184e-08;2.0898e-06 |
|                  | 97302_at               | <a href="#">117198</a> | <b>Ivns1abp</b>                      | influenza virus NS1A binding protein                                     | 1.73;1.54;1.25                  | 0.00071315;0.00760964;0.14007705 |
|                  | 99541_at               | <a href="#">16551</a>  | <b>Kif11</b>                         | kinesin family member 11                                                 | 2.07;1.88;1.72                  | 4.406e-05;0.0003503;0.0015575    |
|                  | 160501_at              | <a href="#">19348</a>  | <b>Kif20a</b>                        | kinesin family member 20A                                                | 2.5;2.07;2.04                   | 1.1720e-05;0.00032122;0.00040856 |
| 95118_r_at       | <a href="#">110032</a> | <b>Kif22-ps</b>        | kinesin family member 22, pseudogene | 1.56;1.47;1.31                                                           | 2.3732e-06;2.7665e-05;0.0013980 |                                  |

| Function     | Affy ID     | Locus ID               | Gene symbol     | Description                                                                        | Fold change    | p-value                          |
|--------------|-------------|------------------------|-----------------|------------------------------------------------------------------------------------|----------------|----------------------------------|
| Cytoskeleton | 96168_at    | <a href="#">71819</a>  | <b>Kif23</b>    | kinesin family member 23                                                           | 1.92;1.73;1.77 | 2.3170e-06;4.4804e-05;2.4339e-05 |
|              | 160755_at   | <a href="#">73804</a>  | <b>Kif2c</b>    | kinesin family member 2C                                                           | 2.64;2.4;2.26  | 3.0840e-06;2.3922e-05;5.8891e-05 |
|              | 104644_at   | <a href="#">16571</a>  | <b>Kif4</b>     | kinesin family member 4                                                            | 2.36;2.09;1.98 | 1.8023e-06;2.7884e-05;7.1763e-05 |
|              | 98471_f_at  | <a href="#">16580</a>  | <b>Kifc1</b>    | kinesin family member C1                                                           | 1.66;1.49;1.4  | 6.0875e-07;3.3972e-05;0.00023083 |
|              | 94561_at    | <a href="#">65970</a>  | <b>Lima1</b>    | LIM domain and actin binding 1                                                     | 0.57;0.57;0.61 | 5.5225e-07;9.4731e-07;8.8061e-06 |
|              | 160288_at   | <a href="#">67443</a>  | <b>Map1lc3</b>  | microtubule-associated protein 1 light chain 3 beta                                | 0.53;0.76;0.78 | 6.3114e-08;0.0035385;0.0081012   |
|              | 97447_at    | <a href="#">66734</a>  | <b>Map1lc3a</b> | microtubule-associated protein 1 light chain 3 alpha                               | 0.54;0.56;0.72 | 1.0525e-07;6.4994e-07;0.00090845 |
|              | 104368_at   | <a href="#">100732</a> | <b>Mapre3</b>   | microtubule-associated protein, RP/EB family, member 3                             | 0.66;0.81;0.78 | 1.1628e-07;0.00110624;0.00015939 |
|              | 160308_at   | <a href="#">17698</a>  | <b>Msn</b>      | moesin                                                                             | 1.83;1.6;1.7   | 1.0558e-09;1.6709e-07;2.5335e-08 |
|              | 94537_at    | <a href="#">67938</a>  | <b>Mylc2b</b>   | myosin light chain, regulatory B                                                   | 0.55;0.71;0.73 | 1.6077e-11;6.3741e-07;2.2681e-06 |
|              | 100923_at   | <a href="#">17909</a>  | <b>Myo10</b>    | myosin X                                                                           | 0.69;0.57;0.72 | 2.6070e-05;1.0163e-07;0.00017803 |
|              | 93427_at    | <a href="#">338367</a> | <b>Myo1d</b>    | myosin ID                                                                          | 0.62;0.6;0.77  | 4.4414e-08;3.1502e-08;0.00025147 |
|              | 94910_at    | <a href="#">67203</a>  | <b>Nde1</b>     | nuclear distribution gene E homolog 1 (A nidulans)                                 | 1.82;1.72;1.53 | 2.9573e-05;0.00017192;0.00191956 |
|              | 161000_i_at | <a href="#">108907</a> | <b>Nusap1</b>   | nucleolar protein ANKT                                                             | 1.99;2.21;1.87 | 0.00067667;0.00024193;0.00223473 |
|              | 100554_at   | <a href="#">54132</a>  | <b>Pdlim1</b>   | PDZ and LIM domain 1 (elfin)                                                       | 2.58;2.21;2.4  | 3.6716e-12;3.1920e-10;4.5132e-11 |
|              | 99662_at    | <a href="#">18541</a>  | <b>Pcnt2</b>    | pericentrin 2                                                                      | 1.58;1.62;1.54 | 7.0412e-05;6.1368e-05;0.00021778 |
|              | 96187_at    | <a href="#">67756</a>  | <b>Pkp4</b>     | plakophilin 4                                                                      | 2.2;2.09;1.76  | 8.5194e-09;5.2868e-08;3.5648e-06 |
|              | 95502_at    | <a href="#">64383</a>  | <b>Sirt2</b>    | sirtuin 2 (silent mating type information regulation 2, homolog) 2 (S. cerevisiae) | 0.55;0.71;0.77 | 2.6263e-07;0.00068828;0.00551248 |
|              | 93898_at    | <a href="#">24051</a>  | <b>Sgcb</b>     | sarcoglycan, beta (dystrophin-associated glycoprotein)                             | 0.66;0.8;0.8   | 2.9346e-06;0.0046526;0.0058987   |
|              | 103345_at   | <a href="#">20740</a>  | <b>Spna2</b>    | spectrin alpha 2                                                                   | 0.53;0.48;0.56 | 1.6702e-06;3.1733e-07;1.0114e-05 |
|              | 93571_at    | <a href="#">20742</a>  | <b>Spnb2</b>    | spectrin beta 2                                                                    | 0.53;0.51;0.56 | 2.4659e-07;1.4755e-07;1.4556e-06 |
|              | 102378_at   | <a href="#">16651</a>  | <b>Sspn</b>     | sarcospan                                                                          | 0.64;0.66;0.67 | 2.1241e-10;1.6944e-09;3.0101e-09 |
|              | 94991_at    | <a href="#">104027</a> | <b>Synpo</b>    | synaptopodin                                                                       | 0.19;0.23;0.2  | 8.6459e-14;2.4190e-12;3.6325e-13 |
|              | 93541_at    | <a href="#">21345</a>  | <b>Tagln</b>    | transgelin                                                                         | 2.13;1.12;1.85 | 0.00022055;0.52685997;0.00247711 |
|              | 160162_at   | <a href="#">21346</a>  | <b>Tagln2</b>   | transgelin 2                                                                       | 2.07;2.41;2.43 | 8.7421e-10;5.5177e-11;4.4937e-11 |
|              | 96426_at    | <a href="#">19241</a>  | <b>Tmsb4x</b>   | thymosin, beta 4, X chromosome                                                     | 1.57;1.51;1.45 | 0.00018301;0.00069227;0.00171838 |
|              | 100593_at   | <a href="#">21956</a>  | <b>Tnnt2</b>    | troponin T2, cardiac                                                               | 1.52;1.13;1.5  | 4.3451e-06;0.11413;1.3394e-05    |
|              | 160461_f_at | <a href="#">67951</a>  | <b>Tubb6</b>    | tubulin, beta 6                                                                    | 2.54;2.2;1.96  | 1.6113e-08;5.5314e-07;5.5863e-06 |
|              | 99924_at    | <a href="#">103733</a> | <b>Tubg1</b>    | tubulin, gamma 1                                                                   | 1.59;1.56;1.55 | 1.1344e-08;4.1225e-08;6.3937e-08 |
|              | 100084_at   | <a href="#">22350</a>  | <b>Vil2</b>     | villin 2                                                                           | 1.71;1.99;1.7  | 1.1791e-07;3.5778e-09;3.0041e-07 |

| Function                   | Affy ID     | Locus ID               | Gene symbol    | Description                                                     | Fold change    | p-value                          |
|----------------------------|-------------|------------------------|----------------|-----------------------------------------------------------------|----------------|----------------------------------|
| Intracellular              | 160227_s_a  | <a href="#">53414</a>  | <b>Bysl</b>    | bystin-like                                                     | 1.77;1.44;1.38 | 9.9810e-14;1.5377e-09;1.4764e-08 |
| Cell adhesion              | 98151_s_at  | <a href="#">12388</a>  | <b>Catns</b>   | catenin src                                                     | 0.65;0.71;0.65 | 0.00049149;0.00601105;0.00085516 |
| Signal transducer activity | 95022_at    | <a href="#">83397</a>  | <b>Akap12</b>  | A kinase (PRKA) anchor protein (gravin) 12                      | 0.48;0.45;0.5  | 4.8127e-07;2.4486e-07;2.0113e-06 |
|                            | 92968_at    | <a href="#">11844</a>  | <b>Arf5</b>    | ADP-ribosylation factor 5                                       | 0.65;0.77;0.76 | 5.1535e-07;0.00049680;0.00027604 |
|                            | 97811_at    | <a href="#">66251</a>  | <b>Arfgap3</b> | ADP-ribosylation factor GTPase activating protein 3             | 0.56;0.63;0.64 | 9.6581e-10;1.2729e-07;2.5883e-07 |
|                            | 92185_at    | <a href="#">320982</a> | <b>Ar14c</b>   | ADP-ribosylation factor-like 4C                                 | 1.72;2.27;1.87 | 1.9873e-10;1.1953e-13;2.8216e-11 |
|                            | 96203_at    | <a href="#">75600</a>  | <b>Calml4</b>  | calmodulin-like 4                                               | 0.38;0.42;0.37 | 2.3441e-11;4.3086e-10;3.9493e-11 |
|                            | 93274_at    | <a href="#">12747</a>  | <b>Cik</b>     | CDC-like kinase                                                 | 0.63;0.67;0.66 | 0.0009400;0.0036045;0.0026288    |
|                            | 98928_at    | <a href="#">23789</a>  | <b>Coro1b</b>  | coronin, actin binding protein 1B                               | 0.6;0.81;0.83  | 9.8488e-08;0.0074887;0.0150791   |
|                            | 94483_at    | <a href="#">13000</a>  | <b>Csnk2a2</b> | casein kinase II, alpha 2, polypeptide                          | 1.56;1.39;1.3  | 2.2986e-07;3.7198e-05;0.00051794 |
|                            | 95701_at    | <a href="#">67393</a>  | <b>Cxc5</b>    | CXXC finger 5                                                   | 0.64;0.63;0.65 | 3.6971e-14;5.6949e-14;3.4340e-13 |
|                            | 160976_at   | <a href="#">225390</a> | <b>Diap1</b>   | diaphanous homolog 1 (Drosophila)                               | 1.55;1.5;1.45  | 2.4236e-06;1.4314e-05;4.0313e-05 |
|                            | 95628_at    | <a href="#">56419</a>  | <b>Diap3</b>   | diaphanous homolog 3 (Drosophila)                               | 2.05;1.9;1.69  | 6.6842e-08;8.4604e-07;1.6407e-05 |
|                            | 104598_at   | <a href="#">19252</a>  | <b>Dusp1</b>   | dual specificity phosphatase 1                                  | 2.74;2.85;3.47 | 1.5286e-13;1.5917e-13;4.0837e-15 |
|                            | 93285_at    | <a href="#">67603</a>  | <b>Dusp6</b>   | dual specificity phosphatase 6                                  | 2.62;2.22;1.98 | 1.9749e-07;6.5004e-06;5.0713e-05 |
|                            | 102925_at   | <a href="#">75590</a>  | <b>Dusp9</b>   | dual specificity phosphatase 9                                  | 2.54;2.68;2.18 | 1.2696e-09;1.0152e-09;6.7136e-08 |
|                            | 97411_at    | <a href="#">13605</a>  | <b>Ect2</b>    | ect2 oncogene                                                   | 3.66;3.5;2.88  | 2.1412e-07;7.4156e-07;8.5875e-06 |
|                            | 93974_at    | <a href="#">74155</a>  | <b>Errfi1</b>  | ERBB receptor feedback inhibitor 1                              | 2.07;1.82;1.51 | 4.6405e-07;1.4698e-05;0.00095967 |
|                            | 101934_at   | <a href="#">225020</a> | <b>Fez2</b>    | fasciculation and elongation protein zeta 2 (zygin II)          | 2.05;1.27;1.52 | 1.3822e-07;0.02416479;0.00034975 |
|                            | 99176_at    | <a href="#">58249</a>  | <b>Fibp</b>    | fibroblast growth factor (acidic) intracellular binding protein | 0.66;0.77;0.76 | 1.0935e-07;0.00016428;8.4859e-05 |
|                            | 103699_i_at | <a href="#">212398</a> | <b>Frat2</b>   | frequently rearranged in advanced T-cell lymphomas 2            | 1.43;1.79;1.7  | 4.5382e-06;3.0561e-09;1.4408e-08 |
|                            | 104358_at   | <a href="#">52666</a>  | <b>GEFT</b>    | RAC/CDC42 exchange factor                                       | 0.63;0.69;0.72 | 5.8980e-12;6.4705e-10;1.0048e-08 |
|                            | 102040_at   | <a href="#">26385</a>  | <b>Gprk6</b>   | G protein-coupled receptor kinase 6                             | 1.53;1.4;1.27  | 7.1280e-09;7.3881e-07;7.0692e-05 |
|                            | 93690_at    | <a href="#">14783</a>  | <b>Grb10</b>   | growth factor receptor bound protein 10                         | 0.55;0.57;0.67 | 0.00031828;0.00096883;0.01326198 |
|                            | 100113_s_a  | <a href="#">16579</a>  | <b>Kifap3</b>  | kinesin-associated protein 3                                    | 0.57;0.62;0.58 | 1.5067e-09;6.3998e-08;6.2399e-09 |

| Function                   | Affy ID               | Locus ID               | Gene symbol                 | Description                                                   | Fold change                      | p-value                          |
|----------------------------|-----------------------|------------------------|-----------------------------|---------------------------------------------------------------|----------------------------------|----------------------------------|
| Intracellular              | 160261_i_at           | <a href="#">50523</a>  | <b>Lats2</b>                | large tumor suppressor 2                                      | 2.07;1.58;1.62                   | 1.3447e-08;3.1665e-05;1.6287e-05 |
| Signal transducer activity | 99164_at              | <a href="#">83409</a>  | <b>Mapbpip</b>              | mitogen activated protein binding protein interacting protein | 0.66;0.79;0.79                   | 2.2309e-08;0.00016253;0.00018699 |
|                            | 103416_at             | <a href="#">50772</a>  | <b>Mapk6</b>                | mitogen-activated protein kinase 6                            | 1.94;1.96;1.87                   | 2.6038e-13;4.8584e-13;2.0295e-12 |
|                            | 93573_at              | <a href="#">17748</a>  | <b>Mt1</b>                  | metallothionein 1                                             | 0.41;0.69;0.77                   | 1.0600e-08;0.0022949;0.0200567   |
|                            | 101561_at             | <a href="#">17750</a>  | <b>Mt2</b>                  | metallothionein 2                                             | 0.48;0.73;0.83                   | 1.5322e-07;0.005129;0.086463     |
|                            | 94223_at              | <a href="#">56349</a>  | <b>Net1</b>                 | neuroepithelial cell transforming gene 1                      | 1.7;1.28;1.37                    | 3.0156e-06;0.0128797;0.0019038   |
|                            | 93178_at              | <a href="#">53972</a>  | <b>Ngef</b>                 | neuronal guanine nucleotide exchange factor                   | 1.54;2.16;1.61                   | 1.1161e-08;2.6652e-13;4.0195e-09 |
|                            | 102207_at             | <a href="#">223649</a> | <b>Nrbp2</b>                | nuclear receptor binding protein 2                            | 0.62;0.62;0.59                   | 9.1054e-08;2.2124e-07;4.5411e-08 |
|                            | 93421_at              | <a href="#">18647</a>  | <b>Pftk1</b>                | PFTAIRE protein kinase 1                                      | 0.56;0.54;0.47                   | 5.4574e-08;4.3424e-08;1.7408e-09 |
|                            | 96592_at              | <a href="#">18708</a>  | <b>Pik3r1</b>               | PI3-kinase, regulatory subunit, polypeptide 1 (p85 alpha)     | 0.58;0.68;0.69                   | 8.2975e-07;0.00014111;0.00023742 |
|                            | 98005_at              | <a href="#">18767</a>  | <b>Pkia</b>                 | protein kinase inhibitor, alpha                               | 1.9;2.17;1.65                    | 9.3107e-10;5.3395e-11;1.6580e-07 |
|                            | 104580_at             | <a href="#">18799</a>  | <b>Plcd</b>                 | phospholipase C, delta                                        | 0.59;0.63;0.69                   | 5.5519e-13;3.0727e-11;2.0774e-09 |
|                            | 160078_at             | <a href="#">18938</a>  | <b>Ppp1r14b</b>             | protein phosphatase 1, regulatory (inhibitor) subunit         | 1.83;1.9;1.79                    | 4.9379e-09;3.7861e-09;1.9430e-08 |
|                            | 95092_at              | <a href="#">19055</a>  | <b>Ppp3ca</b>               | protein phosphatase 3, catalytic subunit, alpha isoform       | 0.66;0.86;0.69                   | 1.1377e-05;0.058362;9.3250e-05   |
|                            | 94989_at              | <a href="#">70161</a>  | <b>Pten</b>                 | phosphatase and tensin homolog                                | 0.77;0.67;0.62                   | 0.00062152;1.0254e-05;6.4266e-07 |
|                            | 98424_at              | <a href="#">19249</a>  | <b>Ptpn13</b>               | protein tyrosine phosphatase, non-receptor type 13            | 0.53;0.53;0.52                   | 3.1351e-09;6.3181e-09;5.8406e-09 |
|                            | 94953_at              | <a href="#">26934</a>  | <b>Racgap1</b>              | Rac GTPase-activating protein 1                               | 1.67;1.65;1.54                   | 4.8526e-05;0.00010028;0.00048874 |
|                            | 100530_at             | <a href="#">19730</a>  | <b>Ralgds</b>               | ral guanine nucleotide dissociation stimulator                | 0.61;0.84;0.8                    | 2.0352e-09;0.00313068;0.00043433 |
|                            | 98573_r_at            | <a href="#">19385</a>  | <b>Ranbp1</b>               | RAN binding protein 1                                         | 1.71;1.51;1.52                   | 7.0359e-07;4.6407e-05;3.7760e-05 |
|                            | 100562_at             | <a href="#">57785</a>  | <b>Rangrnf</b>              | RAN guanine nucleotide release factor                         | 1.53;1.38;1.28                   | 4.9663e-07;4.5224e-05;0.00076261 |
|                            | 160965_at             | <a href="#">54153</a>  | <b>Rasa4</b>                | RAS p21 protein activator 4                                   | 0.7;0.65;0.72                    | 2.3106e-05;3.0787e-06;0.00011231 |
| 102821_s_a                 | <a href="#">19428</a> | <b>Rasl2-9</b>         | RAS-like, family 2, locus 9 | 1.57;1.49;1.5                                                 | 3.0550e-07;3.5645e-06;3.1013e-06 |                                  |

| Function                    | Affy ID   | Locus ID               | Gene symbol    | Description                                                 | Fold change    | p-value                          |
|-----------------------------|-----------|------------------------|----------------|-------------------------------------------------------------|----------------|----------------------------------|
| <b>Intracellular</b>        | 161609_at | <a href="#">19734</a>  | <b>Rgs16</b>   | regulator of G-protein signaling 16                         | 1.73;1.49;1.74 | 1.1459e-09;5.8703e-07;1.9425e-09 |
| Signal transducer activity  | 98950_at  | <a href="#">54170</a>  | <b>Rragc</b>   | Ras-related GTP binding C                                   | 0.64;0.84;0.89 | 3.8046e-06;0.029782;0.150484     |
|                             | 94394_at  | <a href="#">20130</a>  | <b>Rras</b>    | Harvey rat sarcoma oncogene, subgroup R                     | 0.56;0.79;0.72 | 2.9907e-07;0.01207990;0.00078678 |
|                             | 93713_at  | <a href="#">20416</a>  | <b>Shc1</b>    | src homology 2 domain-containing transforming protein C1    | 0.64;0.71;0.79 | 1.7882e-05;0.00065112;0.01272289 |
|                             | 104063_at | <a href="#">71943</a>  | <b>Srcasm</b>  | Src activating and signaling molecule                       | 2.13;2.03;1.83 | 1.5559e-10;1.1996e-09;2.2295e-08 |
|                             | 92310_at  | <a href="#">20620</a>  | <b>Snk</b>     | serum-inducible kinase                                      | 1.54;1.58;1.68 | 7.2620e-08;5.4060e-08;5.5493e-09 |
|                             | 101995_at | <a href="#">18412</a>  | <b>Sqstm1</b>  | sequestosome 1                                              | 0.64;0.83;0.96 | 1.5008e-05;0.041524;0.593926     |
|                             | 97909_at  | <a href="#">16765</a>  | <b>Stmn1</b>   | stathmin 1                                                  | 1.49;1.84;1.68 | 0.00390271;9.3291e-05;0.00055743 |
|                             | 96531_at  | <a href="#">213773</a> | <b>Tbl3</b>    | transducin (beta)-like 3                                    | 1.64;1.55;1.59 | 8.6258e-08;1.0474e-06;4.3281e-07 |
|                             | 102850_at | <a href="#">51789</a>  | <b>Tnk2</b>    | tyrosine kinase, non-receptor, 2                            | 2.3;1.74;1.87  | 5.1765e-15;5.9443e-11;5.2883e-12 |
|                             | 95010_at  | <a href="#">22031</a>  | <b>Traf3</b>   | Tnf receptor-associated factor 3                            | 1.68;1.84;1.78 | 5.7201e-11;4.3638e-12;1.3826e-11 |
|                             | 104053_at | <a href="#">223435</a> | <b>Trio</b>    | triple functional domain (PTPRF interacting)                | 0.6;0.61;0.56  | 1.0927e-06;4.0530e-06;4.1355e-07 |
|                             | 93538_at  | <a href="#">56196</a>  | <b>Ttrap</b>   | Traf and Tnf receptor associated protein                    | 1.62;1.57;1.43 | 5.0469e-06;2.3180e-05;0.00032115 |
|                             | 97393_at  | <a href="#">22367</a>  | <b>Vrk1</b>    | vaccinia related kinase 1                                   | 1.47;1.51;1.31 | 2.3179e-06;1.8990e-06;0.00034914 |
| <b>Protein biosynthesis</b> | 97318_at  | <a href="#">66044</a>  | <b>Hars2</b>   | histidyl-tRNA synthetase                                    | 0.63;0.77;0.73 | 3.3930e-08;0.00016896;1.6132e-05 |
|                             | 103537_at | <a href="#">13666</a>  | <b>Eif2ak3</b> | eukaryotic translation initiation factor 2 alpha kinase 3   | 0.69;0.7;0.62  | 1.5690e-07;8.0157e-07;4.2129e-09 |
|                             | 94530_at  | <a href="#">217715</a> | <b>Eif2b2</b>  | eukaryotic translation initiation factor 2B, subunit 2 beta | 1.49;1.59;1.62 | 9.3266e-09;1.2806e-09;4.8878e-10 |
|                             | 94253_at  | <a href="#">13665</a>  | <b>Eif2s1</b>  | eukaryotic translation initiation factor 2, subunit 1 alpha | 1.77;1.71;1.53 | 1.0573e-08;5.7924e-08;2.2186e-06 |
|                             | 97205_at  | <a href="#">78655</a>  | <b>Eif3s1</b>  | eukaryotic translation initiation factor 3, subunit 1 alpha | 1.52;1.29;1.15 | 4.6294e-05;0.0072067;0.1198724   |
|                             | 93973_at  | <a href="#">27979</a>  | <b>Eif3s9</b>  | eukaryotic translation initiation factor 3, subunit 9       | 1.68;1.48;1.48 | 7.8131e-13;3.9472e-10;4.5841e-10 |
|                             | 160974_at | <a href="#">13682</a>  | <b>Eif4a2</b>  | eukaryotic translation initiation factor 4A2                | 1.61;1.4;1.39  | 2.8954e-11;3.3510e-08;6.1076e-08 |
|                             | 96628_at  | <a href="#">107508</a> | <b>Eprs</b>    | glutamyl-prolyl-tRNA synthetase                             | 0.68;0.62;0.58 | 0.00032076;4.237e-05;6.968e-06   |
|                             | 160451_at | <a href="#">225363</a> | <b>Etf1</b>    | eukaryotic translation termination factor 1                 | 1.67;1.51;1.6  | 2.7885e-10;3.4844e-08;3.6719e-09 |
|                             | 92580_at  | <a href="#">15115</a>  | <b>Hars</b>    | histidyl-tRNA synthetase                                    | 1.54;1.42;1.23 | 5.8242e-05;0.00076542;0.03501292 |
|                             | 160431_at | <a href="#">56282</a>  | <b>Mrpl12</b>  | mitochondrial ribosomal protein L12                         | 1.73;1.59;1.52 | 4.4483e-11;2.3862e-09;1.6121e-08 |
|                             | 99140_at  | <a href="#">94063</a>  | <b>Mrpl16</b>  | mitochondrial ribosomal protein L16                         | 1.53;1.52;1.47 | 2.0533e-06;3.9749e-06;1.3013e-05 |



| Function             | Affy ID                         | Locus ID               | Gene symbol           | Description                                                         | Fold change                  | p-value                          |                                  |
|----------------------|---------------------------------|------------------------|-----------------------|---------------------------------------------------------------------|------------------------------|----------------------------------|----------------------------------|
| Protein biosynthesis | 93786_i_at                      | <a href="#">67681</a>  | <b>Mrpl18</b>         | mitochondrial ribosomal protein L18                                 | 1.52;1.62;1.46               | 0.00087637;0.00033434;0.00290320 |                                  |
|                      | 160345_at                       | <a href="#">94065</a>  | <b>Mrpl34</b>         | mitochondrial ribosomal protein L34                                 | 1.35;1.5;1.41                | 7.7382e-06;1.9964e-07;2.3316e-06 |                                  |
|                      | 97251_at                        | <a href="#">64657</a>  | <b>Mrps10</b>         | mitochondrial ribosomal protein S10                                 | 1.52;1.55;1.47               | 2.1570e-06;2.0637e-06;1.4797e-05 |                                  |
|                      | 160621_at                       | <a href="#">64655</a>  | <b>Mrps22</b>         | mitochondrial ribosomal protein S22                                 | 1.36;1.55;1.31               | 0.00550669;0.00039047;0.01799110 |                                  |
|                      | 102128_f_at                     | <a href="#">64658</a>  | <b>Mrps25</b>         | mitochondrial ribosomal protein S25                                 | 1.66;1.79;1.51               | 9.3150e-07;2.1218e-07;2.8591e-05 |                                  |
|                      | 96693_at                        | <a href="#">104458</a> | <b>Rars</b>           | arginyl-tRNA synthetase                                             | 1.57;1.61;1.65               | 7.8076e-11;6.6199e-11;2.4007e-11 |                                  |
|                      | 92857_at                        | <a href="#">67183</a>  | <b>Rpl22</b>          | ribosomal protein L22                                               | 0.44;0.51;0.47               | 9.3540e-12;8.7251e-10;1.2865e-10 |                                  |
|                      | 99198_at                        | <a href="#">19951</a>  | <b>Rpl32</b>          | ribosomal protein L32                                               | 1.57;1.57;1.41               | 7.0254e-07;1.4449e-06;6.2902e-05 |                                  |
|                      | 160071_at                       | <a href="#">54364</a>  | <b>Rpp30</b>          | RNaseP protein p30                                                  | 2.13;2.01;1.74               | 1.1096e-06;6.5593e-06;0.0001189  |                                  |
|                      | 96778_at                        | <a href="#">59014</a>  | <b>Rrs1</b>           | RRS1 ribosome biogenesis regulator homolog (S. cerevisiae)          | 2.11;1.94;1.68               | 1.1638e-09;2.1234e-08;1.2416e-06 |                                  |
|                      | 160283_at                       | <a href="#">66409</a>  | <b>Rsl1d1</b>         | ribosomal L1 domain containing 1                                    | 1.57;1.44;1.33               | 2.0440e-07;9.3271e-06;0.00020352 |                                  |
|                      | Protein folding and modificatio | 98153_at               | <a href="#">12462</a> | <b>Cct3</b>                                                         | chaperonin subunit 3 (gamma) | 1.6;1.55;1.39                    | 1.4246e-06;6.6649e-06;0.00023406 |
|                      |                                 | 160562_at              | <a href="#">12468</a> | <b>Cct7</b>                                                         | chaperonin subunit 7 (eta)   | 1.62;1.56;1.46                   | 1.4709e-11;1.8153e-10;3.7601e-09 |
| 94531_at             |                                 | <a href="#">67914</a>  | <b>Coq9</b>           | coenzyme Q9 homolog (yeast)                                         | 0.61;0.7;0.71                | 1.0337e-11;1.8735e-08;2.5054e-08 |                                  |
| 160230_at            |                                 | <a href="#">12856</a>  | <b>Cox17</b>          | cytochrome c oxidase, subunit XVII assembly protein homolog (yeast) | 1.39;1.54;1.45               | 0.00018921;1.015e-05;7.810e-05   |                                  |
| 99082_at             |                                 | <a href="#">14230</a>  | <b>Fkbp10</b>         | FK506 binding protein 10                                            | 0.72;0.64;0.7                | 4.7200e-07;4.9698e-09;2.1393e-07 |                                  |
| 102689_at            |                                 | <a href="#">14976</a>  | <b>H2-Ke2</b>         | H2-K region expressed gene 2                                        | 0.59;0.81;0.87               | 1.7477e-05;0.052969;0.194556     |                                  |
| 100279_at            |                                 | <a href="#">20444</a>  | <b>Siat5</b>          | sialyltransferase 5                                                 | 0.66;0.83;0.85               | 0.00024228;0.07394097;0.12468240 |                                  |
| 97310_at             |                                 | <a href="#">70356</a>  | <b>St13</b>           | suppression of tumorigenicity 13                                    | 0.63;0.8;0.81                | 2.9535e-06;0.011013;0.015929     |                                  |
| 162279_f_at          |                                 | <a href="#">12466</a>  | <b>Cct6a</b>          | chaperonin subunit 6a (zeta)                                        | 1.62;1.45;1.22               | 1.9411e-06;0.00011699;0.01947969 |                                  |
| 99546_at             |                                 | <a href="#">14227</a>  | <b>Fkbp2</b>          | FK506 binding protein 2                                             | 1.5;1.43;1.53                | 8.6915e-08;1.2482e-06;7.1973e-08 |                                  |
| 92808_f_at           |                                 | <a href="#">14228</a>  | <b>Fkbp4</b>          | FK506 binding protein 4                                             | 1.67;1.58;1.4                | 2.2210e-09;3.4795e-08;5.1099e-06 |                                  |
| 104746_at            |                                 | <a href="#">14231</a>  | <b>Fkbp7</b>          | FK506 binding protein 7                                             | 0.63;0.61;0.63               | 5.8694e-05;4.1201e-05;8.1186e-05 |                                  |
| 93731_at             |                                 | <a href="#">27055</a>  | <b>Fkbp9</b>          | FK506 binding protein 9                                             | 0.65;0.62;0.63               | 3.8688e-08;1.6557e-08;2.4316e-08 |                                  |
| 102761_at            |                                 | <a href="#">17714</a>  | <b>Grpel2</b>         | GrpE-like 2, mitochondrial                                          | 1.43;1.47;1.52               | 4.1018e-09;2.8614e-09;4.8443e-10 |                                  |
| 102047_at            |                                 | <a href="#">18107</a>  | <b>Nmt1</b>           | N-myristoyltransferase 1                                            | 1.51;1.49;1.42               | 5.1442e-08;1.8417e-07;1.3203e-06 |                                  |

| Function                        | Affy ID                | Locus ID              | Gene symbol    | Description                                                                  | Fold change    | p-value                          |
|---------------------------------|------------------------|-----------------------|----------------|------------------------------------------------------------------------------|----------------|----------------------------------|
| Protein folding and modificatio | 97445_at               | <a href="#">67738</a> | <b>Ppid</b>    | peptidylprolyl isomerase D (cyclophilin D)                                   | 2.05;1.71;1.41 | 3.4595e-06;0.00022633;0.00996325 |
|                                 | 95077_at               | <a href="#">19352</a> | <b>Rabggtb</b> | RAB geranylgeranyl transferase, b subunit                                    | 1.62;1.63;1.57 | 5.4808e-07;8.1669e-07;2.9187e-06 |
|                                 | 98596_s_at             | <a href="#">20454</a> | <b>Siat9</b>   | sialyltransferase 9 (CMP-NeuAc:lactosylceramide alpha-2,3-sialyltransferase) | 0.59;0.67;0.75 | 7.2939e-08;7.3880e-06;0.00045895 |
|                                 | 104738_at              | <a href="#">22792</a> | <b>Zrf2</b>    | zuotin related factor 2                                                      | 1.77;1.66;1.51 | 9.6346e-09;1.6047e-07;4.1648e-06 |
| Proteolysis and peptidolysis    | 101997_at              | <a href="#">67526</a> | <b>Appg12l</b> | autophagy 12-like (S. cerevisiae)                                            | 0.49;0.55;0.64 | 1.1477e-08;4.5358e-07;2.5836e-05 |
|                                 | 97941_at               | <a href="#">12338</a> | <b>Capn6</b>   | calpain 6                                                                    | 0.31;0.47;0.35 | 3.5621e-12;3.2188e-08;6.1261e-11 |
|                                 | 98405_at               | <a href="#">20723</a> | <b>Serpib9</b> | serine (or cysteine) peptidase inhibitor, clade B, member 9                  | 0.59;0.85;0.73 | 1.5793e-08;0.018959;5.1909e-05   |
|                                 | 94916_at               | <a href="#">13121</a> | <b>Cyp51</b>   | cytochrome P450, 51                                                          | 0.87;0.64;0.78 | 0.008686;1.1041e-08;5.1839e-05   |
|                                 | 93595_at               | <a href="#">12751</a> | <b>Cln2</b>    | ceroid-lipofuscinosis, neuronal 2                                            | 0.59;0.86;0.94 | 2.6621e-05;0.15617;0.54953       |
|                                 | 104036_at              | <a href="#">83768</a> | <b>Dpp7</b>    | dipeptidylpeptidase 7                                                        | 0.57;0.82;0.98 | 4.7098e-05;0.09774;0.85408       |
|                                 | 101055_at              | <a href="#">19025</a> | <b>Ppgb</b>    | protective protein for beta-galactosidase                                    | 0.53;0.8;0.92  | 1.1815e-05;0.065344;0.471702     |
|                                 | 96065_at               | <a href="#">17035</a> | <b>Lxn</b>     | latexin                                                                      | 0.27;0.35;0.38 | 1.0253e-10;1.4388e-08;5.9299e-08 |
|                                 | 101070_at              | <a href="#">54484</a> | <b>Mkrn1</b>   | makorin, ring finger protein, 1                                              | 0.62;0.7;0.72  | 7.5979e-10;3.0656e-07;1.1244e-06 |
|                                 | 161079_at              | <a href="#">72560</a> | <b>Naalad2</b> | N-acetylated alpha-linked acidic dipeptidase 2                               | 0.53;0.64;0.55 | 1.2718e-06;0.00025985;6.5608e-06 |
|                                 | 103637_at              | <a href="#">17939</a> | <b>Naga</b>    | N-acetylated alpha-linked acidic dipeptidase 2                               | 0.66;0.74;0.75 | 4.5727e-06;0.00040880;0.00062016 |
|                                 | 103906_f_at            | <a href="#">83814</a> | <b>Nedd4l</b>  | neural precursor cell expressed, developmentally down-regulated gene 4-like  | 1.75;1.5;1.48  | 5.9291e-11;5.1712e-08;7.8272e-08 |
|                                 | 94923_f_at             | <a href="#">73945</a> | <b>Otud4</b>   | OTU domain containing 4                                                      | 1.66;1.4;1.37  | 8.6652e-12;4.4560e-08;1.2873e-07 |
|                                 | 100125_at              | <a href="#">18813</a> | <b>Pa2g4</b>   | proliferation-associated 2G4                                                 | 2.33;2.12;2.14 | 3.0845e-07;3.6412e-06;3.1549e-06 |
|                                 | 93349_at               | <a href="#">18542</a> | <b>Pcolce</b>  | procollagen C-proteinase enhancer protein                                    | 0.47;0.58;0.6  | 8.6118e-13;1.2981e-09;6.3612e-09 |
|                                 | <a href="#">12301</a>  | 92596_at              | <b>Cacybp</b>  | calcyclin binding protein                                                    | 1.49;1.55;1.31 | 0.0018599;0.0011960;0.0300726    |
|                                 | <a href="#">230484</a> | 160234_a              | <b>Usp1</b>    | ubiquitin specific protease 1                                                | 2.15;1.8;1.5   | 9.441e-05;0.0020791;0.0255462    |
|                                 | 93039_at               | <a href="#">54381</a> | <b>Pgcp</b>    | plasma glutamate carboxypeptidase                                            | 0.63;0.78;0.74 | 2.1863e-07;0.00096906;0.00012506 |
|                                 | 96920_at               | <a href="#">56213</a> | <b>Prss11</b>  | protease, serine, 11 (Igf binding)                                           | 1.62;1.72;1.38 | 2.9815e-09;7.4300e-10;4.3764e-06 |
|                                 | 96892_at               | <a href="#">26440</a> | <b>Psma1</b>   | proteasome (prosome, macropain) subunit, alpha type 1                        | 1.47;1.53;1.36 | 5.9533e-05;2.5761e-05;0.0010621  |
|                                 | 93988_at               | <a href="#">26444</a> | <b>Psma7</b>   | proteasome (prosome, macropain) subunit, alpha type 7                        | 1.55;1.59;1.48 | 0.00019325;0.00016172;0.00090251 |
|                                 | 94025_at               | <a href="#">26446</a> | <b>Psmb3</b>   | proteasome (prosome, macropain) subunit, beta type 3                         | 1.58;1.64;1.62 | 3.8466e-09;2.3198e-09;3.5984e-09 |
|                                 | 101558_s_a             | <a href="#">19173</a> | <b>Psmb5</b>   | proteasome (prosome, macropain) subunit, beta type 5                         | 1.35;1.51;1.44 | 0.00098468;5.3772e-05;0.00019119 |
|                                 | 95448_at               | <a href="#">19181</a> | <b>Psmc2</b>   | proteasome (prosome, macropain) 26S subunit, ATPase 2                        | 1.53;1.53;1.53 | 9.029e-05;0.00016124;0.00016378  |
|                                 | 160305_at              | <a href="#">69077</a> | <b>Psmd11</b>  | proteasome (prosome, macropain) 26S subunit, non-ATPase, 11                  | 1.52;1.57;1.48 | 6.2139e-05;4.2754e-05;0.00019676 |

| Function                     | Affy ID     | Locus ID               | Gene symbol           | Description                                                 | Fold change                         | p-value                          |
|------------------------------|-------------|------------------------|-----------------------|-------------------------------------------------------------|-------------------------------------|----------------------------------|
| Proteolysis and peptidolysis | 95742_at    | <a href="#">23997</a>  | <b>Psm13</b>          | proteasome (prosome, macropain) 26S subunit, non-ATPase, 13 | 1.51;1.48;1.45                      | 1.8906e-07;9.7100e-07;1.9552e-06 |
|                              | 98555_at    | <a href="#">22129</a>  | <b>Ttc3</b>           | tetratricopeptide repeat domain                             | 0.65;0.69;0.63                      | 6.9849e-08;1.2886e-06;4.0077e-08 |
|                              | 100528_at   | <a href="#">22214</a>  | <b>Ube2h</b>          | ubiquitin-conjugating enzyme E2H                            | 0.59;0.69;0.63                      | 1.3642e-06;0.00022428;1.8160e-05 |
|                              | 96701_at    | <a href="#">50995</a>  | <b>Uble1b</b>         | ubiquitin-like 1 (sentrin) activating enzyme E1B            | 1.53;1.44;1.34                      | 1.6683e-06;2.5817e-05;0.00034916 |
|                              | 100512_at   | <a href="#">56207</a>  | <b>Uch15</b>          | ubiquitin carboxyl-terminal esterase L5                     | 2.04;2.05;1.8                       | 6.2618e-07;1.0185e-06;1.7679e-05 |
|                              | 100955_at   | <a href="#">67196</a>  | <b>Ube2</b>           | ubiquitin-conjugating enzyme E2T                            | 2.54;2.58;2.21                      | 1.6933e-06;2.4241e-06;2.7764e-05 |
|                              | 99639_at    | <a href="#">22224</a>  | <b>Uchrp</b>          | ubiquitin c-terminal hydrolase related polypeptide          | 1.64;1.49;1.41                      | 1.3107e-10;1.4765e-08;1.5579e-07 |
|                              | 96061_at    | <a href="#">59025</a>  | <b>Usp14</b>          | ubiquitin specific protease 14                              | 1.64;1.4;1.4                        | 5.9261e-06;0.0008616;0.0008283   |
|                              | 97960_at    | <a href="#">216825</a> | <b>Usp22</b>          | ubiquitin specific protease 22                              | 0.64;0.7;0.65                       | 1.0609e-05;0.00023153;2.7545e-05 |
|                              | 95703_at    | <a href="#">56459</a>  | <b>Uble1a</b>         | ubiquitin-like 1 (sentrin) activating enzyme E1A            | 1.62;1.51;1.4                       | 7.1075e-07;1.1637e-05;0.00013997 |
| Heat Shock                   | 98451_at    | <a href="#">56812</a>  | <b>Dnajb10</b>        | DnaJ (Hsp40) homolog, subfamily B, member 10                | 0.66;0.79;0.83                      | 5.5251e-05;0.015012;0.045862     |
|                              | 101890_f_at | <a href="#">22791</a>  | <b>Dnajc2</b>         | DnaJ (Hsp40) homolog, subfamily C, member 2                 | 2.07;1.88;1.74                      | 4.9585e-09;1.2869e-07;1.0194e-06 |
|                              | 160203_at   | <a href="#">108671</a> | <b>Dnajc9</b>         | DnaJ (Hsp40) homolog, subfamily C, member 9                 | 2.03;2.21;1.99                      | 4.1108e-06;1.4726e-06;1.0858e-05 |
|                              | 98111_at    | <a href="#">15505</a>  | <b>Hsp105</b>         | heat shock protein                                          | 2.14;1.9;1.98                       | 7.6058e-12;5.0240e-10;1.4443e-10 |
|                              | 101562_at   | <a href="#">50497</a>  | <b>Hsp70-4</b>        | heat shock protein 4                                        | 1.74;1.79;1.69                      | 6.2610e-07;5.9578e-07;2.5587e-06 |
|                              | 97894_at    | <a href="#">15482</a>  | <b>Hspa11</b>         | heat shock protein 1-like                                   | 1.61;1.47;1.4                       | 1.5017e-09;1.4283e-07;1.2895e-06 |
|                              | 99816_at    | <a href="#">15512</a>  | <b>Hspa2</b>          | heat shock protein 2                                        | 0.5;0.58;0.56                       | 3.3669e-09;4.4923e-07;1.6882e-07 |
|                              | 100353_g_a  | <a href="#">15525</a>  | <b>Hspa4</b>          | heat shock protein 4                                        | 1.5;1.4;1.51                        | 1.2638e-07;3.8053e-06;1.9239e-07 |
|                              | 95282_at    | <a href="#">15519</a>  | <b>Hspca</b>          | heat shock protein 1, alpha                                 | 1.81;1.63;1.59                      | 6.7740e-11;6.5251e-09;1.7588e-08 |
|                              | 93277_at    | <a href="#">15510</a>  | <b>Hspd1</b>          | heat shock protein 1 (chaperonin)                           | 1.61;1.49;1.4                       | 8.7909e-11;5.7988e-09;9.1821e-08 |
|                              | 99489_at    | <a href="#">18415</a>  | <b>Osp94</b>          | osmotic stress protein                                      | 1.67;2.25;1.83                      | 1.0822e-07;5.1486e-11;1.2512e-08 |
|                              | 100081_at   | <a href="#">20867</a>  | <b>Stip1</b>          | stress-induced phosphoprotein 1                             | 1.88;1.79;1.66                      | 3.8126e-09;3.7990e-08;3.7922e-07 |
|                              | Apoptosis   | 101521_at              | <a href="#">11799</a> | <b>Birc5</b>                                                | baculoviral IAP repeat-containing 5 | 2.99;2.74;2.54                   |
| Antiapoptotic                | 94384_at    | <a href="#">15937</a>  | <b>Ier3</b>           | immediate early response 3                                  | 3.13;3.59;4.04                      | 1.2233e-10;3.0586e-11;5.0082e-12 |
|                              | 99392_at    | <a href="#">21929</a>  | <b>Tnfaip3</b>        | tumor necrosis factor, alpha-induced protein 3              | 1.45;1.36;1.65                      | 5.2586e-05;0.00064913;1.4408e-06 |
|                              | 160829_at   | <a href="#">21664</a>  | <b>Phlda1</b>         | pleckstrin homology-like domain, family A, member 1         | 3.02;2.88;2.71                      | 4.2150e-06;1.4329e-05;3.1231e-05 |
| Proapoptotic                 | 93536_at    | <a href="#">12028</a>  | <b>Bax</b>            | Bcl2-associated X protein                                   | 1.2;1.47;1.53                       | 0.0068103;2.5993e-06;6.9523e-07  |
|                              | 98436_s_at  | <a href="#">12367</a>  | <b>Casp3</b>          | caspase 3, apoptosis related cysteine protease              | 1.75;1.89;1.37                      | 1.2193e-06;3.0221e-07;0.0018225  |
|                              | 104290_at   | <a href="#">26885</a>  | <b>Casp8ap2</b>       | caspase 8 associated protein 2                              | 1.85;1.61;1.39                      | 1.1740e-07;1.0350e-05;0.00075622 |

| Function     | Affy ID     | Locus ID               | Gene symbol   | Description                                                     | Fold change    | p-value                          |
|--------------|-------------|------------------------|---------------|-----------------------------------------------------------------|----------------|----------------------------------|
| Apoptosis    | 103711_at   | <a href="#">12371</a>  | <b>Casp9</b>  | caspase 9                                                       | 0.65;0.72;0.73 | 5.5506e-07;5.1249e-05;7.2493e-05 |
| Proapoptotic | 93842_at    | <a href="#">223453</a> | <b>Dap</b>    | death-associated protein                                        | 0.65;0.87;0.84 | 1.6423e-07;0.0349726;0.0087313   |
|              | 99629_at    | <a href="#">13663</a>  | <b>Ei24</b>   | etoposide induced 2.4 mRNA                                      | 1.57;1.55;1.5  | 5.1940e-07;1.5471e-06;5.2763e-06 |
| Cell cycle   | 92639_at    | <a href="#">20878</a>  | <b>Aurka</b>  | serine/threonine kinase 6                                       | 3.56;3.22;2.82 | 1.0000e-06;6.3192e-06;3.1912e-05 |
|              | 98469_at    | <a href="#">20877</a>  | <b>Aurkb</b>  | serine/threonine kinase 12                                      | 1.63;1.6;1.5   | 2.4207e-06;8.0373e-06;5.5586e-05 |
|              | 161172_f_at | <a href="#">215387</a> | <b>Brrn1</b>  | barren homolog (Drosophila)                                     | 1.67;1.68;1.52 | 1.8280e-05;2.7464e-05;0.00030846 |
|              | 96146_at    | <a href="#">12228</a>  | <b>Btg3</b>   | B-cell translocation gene 3                                     | 1.63;1.65;1.52 | 3.7738e-08;5.1220e-08;9.8559e-07 |
|              | 104097_at   | <a href="#">12235</a>  | <b>Bub1</b>   | budding uninhibited by benzimidazoles 1 homolog (S. cerevisiae) | 2.81;2.65;2.26 | 2.4054e-06;1.0409e-05;9.9151e-05 |
|              | 101961_at   | <a href="#">12237</a>  | <b>Bub3</b>   | budding uninhibited by benzimidazoles 3 homolog (S. cerevisiae) | 1.56;1.44;1.35 | 4.9687e-06;0.00010128;0.00094001 |
|              | 99186_at    | <a href="#">12428</a>  | <b>Ccna2</b>  | cyclin A2                                                       | 1.67;1.55;1.48 | 6.2357e-05;0.00054819;0.00173187 |
|              | 160159_at   | <a href="#">268697</a> | <b>Ccnb1</b>  | cyclin B1                                                       | 2.75;2.48;1.94 | 1.7401e-05;0.00011531;0.00249326 |
|              | 94231_at    | <a href="#">12443</a>  | <b>Ccnd1</b>  | cyclin D1                                                       | 1.67;1.93;1.68 | 1.8242e-07;5.2854e-09;3.1915e-07 |
|              | 99073_at    | <a href="#">12449</a>  | <b>Ccnf</b>   | cyclin F                                                        | 2.08;1.93;1.85 | 1.1282e-07;1.1943e-06;3.1300e-06 |
|              | 160127_at   | <a href="#">12450</a>  | <b>Ccng1</b>  | cyclin G1                                                       | 2.02;2.01;1.8  | 2.9245e-10;6.9909e-10;1.7437e-08 |
|              | 98478_at    | <a href="#">12452</a>  | <b>Ccng2</b>  | cyclin G2                                                       | 0.52;0.75;0.8  | 1.4131e-06;0.013060;0.042835     |
|              | 96319_at    | <a href="#">107995</a> | <b>Cdc20</b>  | cell division cycle 20 homolog (S. cerevisiae)                  | 2.41;2.3;2.17  | 6.5130e-06;2.4179e-05;6.2914e-05 |
|              | 102934_s_a  | <a href="#">12532</a>  | <b>Cdc25c</b> | cell division cycle 25 homolog C (S. cerevisiae)                | 1.7;1.58;1.47  | 8.9866e-05;0.00066517;0.00297706 |
|              | 100128_at   | <a href="#">12534</a>  | <b>Cdc2a</b>  | cell division cycle 2 homolog A (S. pombe)                      | 2.56;2.49;2.37 | 1.1923e-06;3.4415e-06;7.8485e-06 |
|              | 94048_at    | <a href="#">216150</a> | <b>Cdc34</b>  | cell division cycle 34 homolog (S. cerevisiae)                  | 1.6;1.84;1.78  | 1.1013e-06;3.1893e-08;8.3793e-08 |
|              | 103797_at   | <a href="#">12545</a>  | <b>Cdc7</b>   | cell division cycle 7 (S. cerevisiae)                           | 2.03;1.96;1.73 | 5.8688e-07;2.5024e-06;4.0563e-05 |
|              | 160699_at   | <a href="#">67849</a>  | <b>Cdca5</b>  | cell division cycle associated 5                                | 1.65;1.57;1.53 | 7.2780e-06;4.7880e-05;9.5107e-05 |
|              | 95063_at    | <a href="#">66953</a>  | <b>Cdca7</b>  | cell division cycle associated 7                                | 2.16;2.03;1.67 | 4.5739e-07;3.2126e-06;0.00019638 |
|              | 96726_at    | <a href="#">264064</a> | <b>Cdk8</b>   | cyclin-dependent kinase 8                                       | 1.52;1.39;1.27 | 4.2180e-07;3.0397e-05;0.0009333  |
|              | 94881_at    | <a href="#">12575</a>  | <b>Cdkn1a</b> | cyclin-dependent kinase inhibitor 1A (P21)                      | 2.01;2.4;2.55  | 1.5494e-09;4.5280e-11;1.1855e-11 |
|              | 103064_at   | <a href="#">12649</a>  | <b>Chek1</b>  | checkpoint kinase 1 homolog (S. pombe)                          | 2.01;1.89;1.62 | 4.0751e-08;3.6225e-07;2.0673e-05 |

| Function                                     | Affy ID     | Locus ID               | Gene symbol      | Description                                                     | Fold change    | p-value                          |
|----------------------------------------------|-------------|------------------------|------------------|-----------------------------------------------------------------|----------------|----------------------------------|
| Cell cycle                                   | 97468_at    | <a href="#">54124</a>  | <b>Cks1</b>      | CDC28 protein kinase 1                                          | 1.78;1.78;1.73 | 2.1523e-05;3.4600e-05;7.1384e-05 |
|                                              | 97527_at    | <a href="#">66197</a>  | <b>Cks2</b>      | CDC28 protein kinase regulatory subunit 2                       | 2.86;2.63;2.25 | 5.5983e-06;2.9669e-05;0.00023352 |
|                                              | 102292_at   | <a href="#">13197</a>  | <b>Gadd45a</b>   | growth arrest and DNA-damage-inducible 45 alpha                 | 1.28;1.71;1.6  | 3.6691e-05;1.9549e-10;2.1930e-09 |
|                                              | 99522_at    | <a href="#">14841</a>  | <b>Gsg2</b>      | germ cell-specific gene 2                                       | 1.94;1.69;1.46 | 1.0942e-06;4.6252e-05;0.0015415  |
|                                              | 103270_at   | <a href="#">29870</a>  | <b>Gtse1</b>     | G two S phase expressed protein 1                               | 1.61;1.59;1.59 | 1.5392e-09;5.2858e-09;5.9447e-09 |
|                                              | 93758_at    | <a href="#">16319</a>  | <b>Incenp</b>    | inner centromere protein                                        | 1.77;1.67;1.63 | 6.628e-05;0.00033392;0.00057127  |
|                                              | 99632_at    | <a href="#">56150</a>  | <b>Mad21</b>     | MAD2 (mitotic arrest deficient, homolog)-like 1 (yeast)         | 2.81;2.63;2.27 | 3.7981e-06;1.6686e-05;0.00012573 |
|                                              | 99457_at    | <a href="#">17345</a>  | <b>Mki67</b>     | antigen identified by monoclonal antibody Ki 67                 | 2.61;2.1;1.97  | 4.0313e-05;0.0010466;0.0022946   |
|                                              | 100885_at   | <a href="#">18005</a>  | <b>Nek2</b>      | NIMA (never in mitosis gene a)-related expressed kinase 2       | 1.74;1.81;1.8  | 2.3065e-05;1.6349e-05;1.7411e-05 |
|                                              | 98996_at    | <a href="#">20873</a>  | <b>Plk4</b>      | polo like kinase 4                                              | 2.73;2.47;2.13 | 3.5926e-06;2.6381e-05;0.0002205  |
|                                              | 95032_at    | <a href="#">233406</a> | <b>Prc1</b>      | protein regulator of cytokinesis 1                              | 3.05;2.75;2.54 | 4.4394e-07;3.7377e-06;1.1598e-05 |
|                                              | 101027_s_a  | <a href="#">30939</a>  | <b>Pttg1</b>     | translocase of inner mitochondrial membrane 8 homolog a (yeast) | 1.5;1.72;1.58  | 0.00014796;6.8561e-06;6.3203e-05 |
|                                              | 104476_at   | <a href="#">19650</a>  | <b>Rb1</b>       | retinoblastoma-like 1 (p107)                                    | 1.93;2.07;1.7  | 7.4518e-07;2.9196e-07;2.9164e-05 |
|                                              | 161787_f_at | <a href="#">67177</a>  | <b>Ris2</b>      | retroviral integration site 2                                   | 1.64;1.82;1.6  | 7.1523e-07;6.0441e-08;2.9390e-06 |
|                                              | 97421_at    | <a href="#">14211</a>  | <b>Smc21</b>     | SMC2 structural maintenance of chromosomes 2-like 1 (yeast)     | 3.12;2.68;2.35 | 2.0564e-06;2.6398e-05;0.00014816 |
|                                              | 103201_at   | <a href="#">22137</a>  | <b>Ttk</b>       | Ttk protein kinase                                              | 1.93;1.76;1.54 | 4.548e-07;7.699e-06;0.00023115   |
| DNA replication,<br>repair and recombination | 97364_at    | <a href="#">66929</a>  | <b>Asf1b</b>     | ASF1 anti-silencing function 1 homolog B (S. cerevisiae)        | 1.91;1.89;1.74 | 1.4999e-08;4.0443e-08;3.9969e-07 |
|                                              | 101105_at   | <a href="#">23825</a>  | <b>Banf1</b>     | barrier to autointegration factor 1                             | 1.44;1.55;1.37 | 3.0338e-05;4.2632e-06;0.00026263 |
|                                              | 102976_at   | <a href="#">12189</a>  | <b>Brca1</b>     | breast cancer 1                                                 | 1.9;1.71;1.71  | 2.4823e-06;5.2757e-05;4.7462e-05 |
|                                              | 104259_at   | <a href="#">12419</a>  | <b>Cbx5</b>      | chromobox homolog 5 (Drosophila HP1a)                           | 1.69;1.48;1.51 | 1.0588e-06;8.9743e-05;5.8100e-05 |
|                                              | 102403_at   | <a href="#">12544</a>  | <b>Cdc45l</b>    | cell division cycle 45 homolog (S. cerevisiae)-like             | 1.76;1.85;1.72 | 6.0438e-09;2.9426e-09;2.7726e-08 |
|                                              | 103821_at   | <a href="#">23834</a>  | <b>Cdc6</b>      | cell division cycle 6 homolog (S. cerevisiae)                   | 3.7;3.3;2.92   | 2.2555e-10;2.7962e-09;2.0108e-08 |
|                                              | 100616_at   | <a href="#">12615</a>  | <b>Cenpa</b>     | centromere autoantigen A                                        | 1.69;1.7;1.57  | 4.2187e-05;6.0210e-05;0.00038000 |
|                                              | 100890_at   | <a href="#">110749</a> | <b>Chaf1b</b>    | chromatin assembly factor 1, subunit B (p60)                    | 1.65;1.76;1.61 | 3.5364e-08;8.1618e-09;1.4521e-07 |
|                                              | 101459_at   | <a href="#">12648</a>  | <b>Chd1</b>      | chromodomain helicase DNA binding protein 1                     | 1.93;1.64;1.51 | 6.0016e-10;1.8520e-07;3.2370e-06 |
|                                              | 92840_at    | <a href="#">101437</a> | <b>Dhx32</b>     | helicase DDX32                                                  | 1.58;1.51;1.36 | 1.4680e-09;2.1890e-08;2.3798e-06 |
|                                              | 103444_at   | <a href="#">327762</a> | <b>Dna2l and</b> | DNA2 DNA replication helicase 2-like (yeast)                    | 2.02;1.89;1.77 | 4.7430e-10;6.9135e-09;4.1851e-08 |
|                                              | 101445_at   | <a href="#">13433</a>  | <b>Dnmt1</b>     | DNA methyltransferase (cytosine-5) 1                            | 1.66;1.51;1.47 | 1.5574e-07;7.7864e-06;2.0368e-05 |

| Function                                     | Affy ID    | Locus ID               | Gene symbol      | Description                                                                | Fold change    | p-value                          |
|----------------------------------------------|------------|------------------------|------------------|----------------------------------------------------------------------------|----------------|----------------------------------|
| DNA replication,<br>repair and recombination | 96297_at   | <a href="#">69072</a>  | <b>Ebna1bp2</b>  | EBNA1 binding protein 2                                                    | 1.9;1.83;1.67  | 3.0254e-06;1.1750e-05;9.4478e-05 |
|                                              | 92317_at   | <a href="#">15569</a>  | <b>Elavl2</b>    | ELAV (embryonic lethal, abnormal vision, Drosophila)-like 2 (Hu antigen B) | 0.59;0.54;0.54 | 1.8383e-06;2.6076e-07;2.5950e-07 |
|                                              | 97327_at   | <a href="#">14156</a>  | <b>Fen1</b>      | flap structure specific endonuclease 1                                     | 3.28;3.4;2.96  | 5.5807e-07;6.9836e-07;4.1440e-06 |
|                                              | 160069_at  | <a href="#">57441</a>  | <b>Gmnn</b>      | geminin                                                                    | 2.36;2.41;2.04 | 7.4473e-07;1.0269e-06;2.0810e-05 |
|                                              | 101954_at  | <a href="#">51788</a>  | <b>H2afz</b>     | H2A histone family, member Z                                               | 1.69;1.67;1.52 | 0.00015527;0.00029460;0.00207575 |
|                                              | 100380_at  | <a href="#">15078</a>  | <b>H3f3a</b>     | H3 histone, family 3A                                                      | 0.58;0.75;0.7  | 3.1648e-07;0.00131133;0.00016662 |
|                                              | 97895_f_at | <a href="#">107435</a> | <b>Hat1</b>      | histidine aminotransferase 1                                               | 1.73;1.7;1.62  | 2.9486e-08;1.0331e-07;5.4316e-07 |
|                                              | 99058_at   | <a href="#">15364</a>  | <b>Hmga2</b>     | high mobility group AT-hook 2                                              | 2.4;2.3;2.42   | 5.7052e-13;3.7027e-12;1.1251e-12 |
|                                              | 93250_r_at | <a href="#">97165</a>  | <b>Hmgb2</b>     | high mobility group box 2                                                  | 1.94;1.89;1.69 | 0.0010280;0.0021329;0.0089560    |
|                                              | 98038_at   | <a href="#">15354</a>  | <b>Hmgb3</b>     | high mobility group box 3                                                  | 1.92;1.92;1.78 | 4.1125e-05;7.0726e-05;0.00028134 |
|                                              | 94805_f_at | <a href="#">319172</a> | <b>Hist1h2ab</b> | histone 1                                                                  | 2.56;2.46;2.17 | 2.6576e-05;7.8836e-05;0.00041054 |
|                                              | 92551_at   | <a href="#">16881</a>  | <b>Lig1</b>      | ligase I, DNA, ATP-dependent                                               | 1.63;1.55;1.5  | 1.5208e-06;1.1940e-05;3.6679e-05 |
|                                              | 103553_at  | <a href="#">70024</a>  | <b>Mcm10</b>     | minichromosome maintenance protein 10                                      | 1.8;1.75;1.67  | 4.6481e-09;2.5978e-08;1.1018e-07 |
|                                              | 93112_at   | <a href="#">17216</a>  | <b>Mcm2</b>      | minichromosome maintenance protein 2                                       | 2.05;2.03;1.89 | 1.6958e-08;4.9843e-08;2.9039e-07 |
|                                              | 92384_at   | <a href="#">22590</a>  | <b>Xpa</b>       | xeroderma pigmentosum, complementation group A                             | 0.56;0.79;0.66 | 6.9247e-06;0.03047158;0.00067399 |
|                                              | 100062_at  | <a href="#">17215</a>  | <b>Mcm3</b>      | minichromosome maintenance protein 3                                       | 3.35;3.34;3.01 | 3.4630e-07;7.0634e-07;2.8006e-06 |
|                                              | 93041_at   | <a href="#">17217</a>  | <b>Mcm4</b>      | minichromosome maintenance protein 4                                       | 2.37;2.3;2.2   | 8.8596e-07;2.8857e-06;6.2493e-06 |
|                                              | 100156_at  | <a href="#">17218</a>  | <b>Mcm5</b>      | minichromosome maintenance protein 5                                       | 3.08;3;2.73    | 2.4254e-06;6.1447e-06;2.0685e-05 |
|                                              | 93356_at   | <a href="#">17220</a>  | <b>Mcm7</b>      | minichromosome maintenance protein 7                                       | 2.64;2.63;2.36 | 4.3067e-08;9.3542e-08;6.5700e-07 |
|                                              | 100033_at  | <a href="#">17685</a>  | <b>Msh2</b>      | mutS homolog 2 (E. coli)                                                   | 1.34;1.54;1.43 | 7.8584e-07;2.0719e-09;7.1028e-08 |
|                                              | 103654_at  | <a href="#">50887</a>  | <b>Nsbp1</b>     | nucleosome binding protein 1                                               | 1.62;1.7;1.53  | 1.9387e-07;8.5939e-08;2.4526e-06 |
|                                              | 101906_at  | <a href="#">70099</a>  | <b>Smc4l1</b>    | SMC4 structural maintenance of chromosomes 4-like 1 (yeast)                | 1.87;1.71;1.43 | 3.4865e-05;0.00033553;0.01084495 |
|                                              | 92458_at   | <a href="#">18392</a>  | <b>Orc1l</b>     | origin recognition complex, subunit 1-like (S.cerevisiae)                  | 2.3;2.32;2.17  | 5.9603e-11;1.1455e-10;5.6682e-10 |
|                                              | 95712_at   | <a href="#">56452</a>  | <b>Orc6l</b>     | origin recognition complex, subunit 6-like (S. cerevisiae)                 | 1.7;1.62;1.51  | 6.1002e-07;4.6450e-06;3.6176e-05 |
|                                              | 92867_at   | <a href="#">54383</a>  | <b>Phc2</b>      | polyhomeotic-like 2 (Drosophila)                                           | 1.76;1.54;1.48 | 2.0467e-10;5.6576e-08;3.2844e-07 |
|                                              | 101065_at  | <a href="#">18538</a>  | <b>Pcna</b>      | proliferating cell nuclear antigen                                         | 2.23;2.24;1.99 | 2.2647e-06;4.0678e-06;3.2512e-05 |
|                                              | 103207_at  | <a href="#">18968</a>  | <b>Pola1</b>     | polymerase (DNA directed), alpha 1                                         | 1.99;1.96;1.68 | 4.3933e-06;1.1069e-05;0.00027739 |
|                                              | 98006_at   | <a href="#">18969</a>  | <b>Pola2</b>     | polymerase (DNA directed), alpha 2                                         | 1.73;1.97;1.77 | 1.8217e-06;1.2772e-07;1.9044e-06 |
|                                              | 103057_at  | <a href="#">18971</a>  | <b>Pold1</b>     | polymerase (DNA directed), delta 1, catalytic subunit                      | 1.68;1.59;1.5  | 2.5956e-07;2.8094e-06;2.1333e-05 |
|                                              | 101920_at  | <a href="#">18974</a>  | <b>Pole2</b>     | polymerase (DNA directed), epsilon 2 (p59 subunit)                         | 1.71;1.95;1.59 | 1.7984e-05;1.4616e-06;0.00017835 |
|                                              | 96772_at   | <a href="#">19075</a>  | <b>Prim1</b>     | DNA primase, p49 subunit                                                   | 1.8;2.17;1.75  | 6.9493e-05;2.9846e-06;0.00020348 |

| Function                                     | Affy ID    | Locus ID               | Gene symbol     | Description                                        | Fold change    | p-value                          |
|----------------------------------------------|------------|------------------------|-----------------|----------------------------------------------------|----------------|----------------------------------|
| DNA replication,<br>repair and recombination | 95549_at   | <a href="#">19076</a>  | <b>Prim2</b>    | DNA primase, p58 subunit                           | 1.81;1.87;1.62 | 1.1073e-05;9.3360e-06;0.00023378 |
|                                              | 104527_at  | <a href="#">19361</a>  | <b>Rad51</b>    | RAD51 homolog (S. cerevisiae)                      | 2.27;2.36;2.29 | 3.7409e-06;3.5609e-06;6.1848e-06 |
|                                              | 93676_at   | <a href="#">19362</a>  | <b>Rad51ap1</b> | RAD51 associated protein 1                         | 1.55;1.58;1.57 | 3.5410e-05;3.9472e-05;4.5675e-05 |
|                                              | 160072_at  | <a href="#">69263</a>  | <b>Rfc3</b>     | replication factor C (activator 1) 3               | 1.51;1.47;1.39 | 1.1305e-06;6.0543e-06;4.1789e-05 |
|                                              | 103418_at  | <a href="#">106344</a> | <b>Rfc4</b>     | replication factor C (activator 1) 4               | 1.41;1.67;1.42 | 0.00475506;0.00015993;0.00534600 |
|                                              | 95612_at   | <a href="#">72151</a>  | <b>Rfc5</b>     | replication factor C (activator 1) 5               | 2.11;2.16;1.92 | 5.1814e-06;5.7787e-06;5.3413e-05 |
|                                              | 96106_at   | <a href="#">69724</a>  | <b>Rnaseh2a</b> | ribonuclease H2, large subunit                     | 1.36;1.51;1.39 | 0.00014913;5.2993e-06;0.00010105 |
|                                              | 95427_at   | <a href="#">68275</a>  | <b>Rpa1</b>     | replication protein A1                             | 1.98;2.13;1.93 | 4.0456e-09;1.2647e-09;1.6693e-08 |
|                                              | 160422_at  | <a href="#">20174</a>  | <b>Ruvb12</b>   | RuvB-like protein 2                                | 1.85;1.8;1.56  | 2.9044e-09;1.5158e-08;1.2864e-06 |
|                                              | 160068_at  | <a href="#">60406</a>  | <b>Sap30</b>    | sin3 associated polypeptide                        | 1.62;1.7;1.58  | 1.2474e-06;5.2911e-07;4.3589e-06 |
|                                              | 103504_at  | <a href="#">66970</a>  | <b>Ssbp2</b>    | single-stranded DNA binding protein 2              | 0.62;0.67;0.58 | 8.2255e-09;2.2360e-07;1.2668e-09 |
|                                              | 100974_at  | <a href="#">76900</a>  | <b>Ssbp4</b>    | single stranded DNA binding protein 4              | 0.64;0.69;0.72 | 8.9366e-10;6.4419e-08;4.0887e-07 |
|                                              | 101437_at  | <a href="#">20874</a>  | <b>Stk2</b>     | serine/threonine kinase 2                          | 1.63;1.8;1.87  | 1.9442e-07;1.7537e-08;5.0263e-09 |
|                                              | 99578_at   | <a href="#">21973</a>  | <b>Top2a</b>    | topoisomerase (DNA) II alpha                       | 3.03;2.63;2.34 | 2.1461e-06;2.5431e-05;0.00012068 |
|                                              | 104045_at  | <a href="#">72480</a>  | <b>Tsyp14</b>   | TSPY-like 4                                        | 0.35;0.32;0.32 | 1.0795e-12;5.1536e-13;5.0777e-13 |
|                                              | 103071_at  | <a href="#">235559</a> | <b>Topbp1</b>   | topoisomerase (DNA) II beta binding protein        | 2.55;2.42;1.99 | 3.4468e-07;1.6483e-06;4.9751e-05 |
|                                              | 103406_at  | <a href="#">74254</a>  | <b>Xab1</b>     | XPA binding protein 1                              | 1.76;1.61;1.42 | 1.2269e-09;6.1696e-08;6.6995e-06 |
| Regulation of transcription                  | 100412_g_a | <a href="#">11568</a>  | <b>Aebp1</b>    | AE binding protein 1                               | 0.59;0.76;0.89 | 0.0005148;0.0540452;0.3948459    |
|                                              | 160215_at  | <a href="#">14797</a>  | <b>Aes</b>      | amino-terminal enhancer of split                   | 0.55;0.67;0.64 | 1.4931e-08;2.0372e-05;4.8669e-06 |
|                                              | 92375_at   | <a href="#">69090</a>  | <b>Ascc1</b>    | activating signal cointegrator 1 complex subunit 1 | 0.55;0.69;0.59 | 9.6078e-10;5.4753e-06;2.2008e-08 |
|                                              | 103006_at  | <a href="#">107503</a> | <b>Atf5</b>     | activating transcription factor 5                  | 0.39;0.42;0.44 | 8.1772e-11;7.4903e-10;2.9411e-09 |
|                                              | 97998_at   | <a href="#">12034</a>  | <b>Bcap37</b>   | dentatorubral pallidolusian atrophy                | 0.52;0.73;0.77 | 6.3207e-05;0.032535;0.077699     |
|                                              | 160531_at  | <a href="#">12034</a>  | <b>Bcap37</b>   | B-cell receptor-associated protein 37              | 1.58;1.59;1.35 | 0.00013037;0.00018525;0.00886135 |
|                                              | 104701_at  | <a href="#">20893</a>  | <b>Bhlhb2</b>   | basic helix-loop-helix domain containing, class B2 | 0.5;0.6;0.59   | 1.5420e-05;0.00085395;0.00050298 |
|                                              | 93371_at   | <a href="#">12173</a>  | <b>Bnc</b>      | basonuclin                                         | 3.7;3.79;3.26  | < 2.22e-16;< 2.22e-16;< 2.22e-16 |
|                                              | 104573_at  | <a href="#">66162</a>  | <b>Bola2</b>    | bolA-like 2                                        | 1.38;1.54;1.4  | 0.00550056;0.00058872;0.00483558 |
|                                              | 93527_at   | <a href="#">16601</a>  | <b>Bteb1</b>    | basic transcription element binding protein 1      | 0.61;0.78;0.79 | 3.9806e-06;0.0076346;0.0104499   |

| Function                    | Affy ID     | Locus ID               | Gene symbol    | Description                                                    | Fold change    | p-value                          |
|-----------------------------|-------------|------------------------|----------------|----------------------------------------------------------------|----------------|----------------------------------|
| Regulation of transcription | 103212_at   | <a href="#">217946</a> | <b>Cdca7l</b>  | cell division cycle associated 7 like                          | 1.47;1.57;1.47 | 3.0197e-06;4.8079e-07;5.0050e-06 |
|                             | 102048_at   | <a href="#">107765</a> | <b>Crap</b>    | carnitine palmitoyltransferase 1, liver                        | 2.29;2.24;2.12 | 5.0697e-10;1.9390e-09;6.8843e-09 |
|                             | 99191_at    | <a href="#">58521</a>  | <b>Cri1</b>    | CREBBP/EP300 inhibitory protein 1                              | 0.57;0.58;0.57 | 2.4030e-08;7.1816e-08;4.4432e-08 |
|                             | 95755_at    | <a href="#">56449</a>  | <b>Csda</b>    | cold shock domain protein A                                    | 1.6;1.47;1.43  | 3.4089e-09;1.9419e-07;6.9162e-07 |
|                             | 101429_at   | <a href="#">13198</a>  | <b>Ddit3</b>   | DNA-damage inducible transcript 3                              | 0.5;0.55;0.58  | 7.5252e-14;2.6184e-12;2.5846e-11 |
|                             | 102963_at   | <a href="#">13555</a>  | <b>E2f1</b>    | E2F transcription factor 1                                     | 1.36;1.53;1.45 | 2.0748e-07;1.7688e-09;1.9111e-08 |
|                             | 103203_f_at | <a href="#">101449</a> | <b>E2f8</b>    | E2F transcription factor 8                                     | 2.2;2.04;1.77  | 2.3944e-07;2.4111e-06;4.7852e-05 |
|                             | 92535_at    | <a href="#">13591</a>  | <b>Ebf1</b>    | early B-cell factor 1                                          | 0.59;0.64;0.64 | 1.4508e-09;6.9988e-08;6.9343e-08 |
|                             | 104492_at   | <a href="#">13593</a>  | <b>Ebf3</b>    | early B-cell factor 3                                          | 0.63;0.68;0.65 | 2.2969e-07;4.4122e-06;1.1503e-06 |
|                             | 98525_f_at  | <a href="#">170942</a> | <b>edr</b>     | erythroid differentiation regulator                            | 1.62;1.47;1.43 | 6.6354e-06;0.00019752;0.00039431 |
|                             | 103342_at   | <a href="#">13626</a>  | <b>Eed</b>     | embryonic ectoderm development                                 | 1.75;1.57;1.4  | 5.7577e-07;2.2096e-05;0.00064866 |
|                             | 103891_i_at | <a href="#">192657</a> | <b>Ell2</b>    | elongation factor RNA polymerase II 2                          | 4.09;4.23;4.63 | < 2.22e-16;< 2.22e-16;< 2.22e-16 |
|                             | 96523_at    | <a href="#">13798</a>  | <b>En1</b>     | engrailed 1                                                    | 0.55;0.71;0.74 | 1.5563e-07;0.00050272;0.00145818 |
|                             | 99917_at    | <a href="#">14056</a>  | <b>Ezh2</b>    | enhancer of zeste homolog 2 (Drosophila)                       | 2.43;2.36;2.02 | 8.0385e-07;2.6075e-06;3.7984e-05 |
|                             | 99835_at    | <a href="#">14283</a>  | <b>Fosl1</b>   | fos-like antigen 1                                             | 3.76;4.05;3.68 | 3.1947e-09;2.4987e-09;9.0928e-09 |
|                             | 102800_at   | <a href="#">14234</a>  | <b>Foxc2</b>   | forkhead box C2                                                | 1.74;1.78;1.76 | 2.9419e-09;2.7992e-09;4.4200e-09 |
|                             | 93704_at    | <a href="#">15227</a>  | <b>Foxf1a</b>  | forkhead box M1                                                | 0.68;0.66;0.73 | 2.1982e-06;1.3869e-06;5.1447e-05 |
|                             | 98305_at    | <a href="#">14235</a>  | <b>Foxm1</b>   | forkhead box M1                                                | 1.5;1.46;1.55  | 0.00051116;0.00142669;0.00034236 |
|                             | 97334_at    | <a href="#">55927</a>  | <b>Hes6</b>    | hairy and enhancer of split 6 (Drosophila)                     | 0.64;0.82;0.81 | 1.1483e-06;0.0088633;0.0063437   |
|                             | 92484_at    | <a href="#">15273</a>  | <b>Hivep2</b>  | human immunodeficiency virus type I enhancer binding protein 2 | 1.99;2.72;2.6  | 1.7633e-07;5.1865e-10;1.2406e-09 |
|                             | 93013_at    | <a href="#">15902</a>  | <b>Idb2</b>    | inhibitor of DNA binding 2                                     | 0.6;0.49;0.52  | 4.0006e-06;4.5689e-08;2.2932e-07 |
|                             | 92614_at    | <a href="#">15903</a>  | <b>Idb3</b>    | inhibitor of DNA binding 3                                     | 0.74;0.66;0.79 | 0.00524779;0.00044558;0.03081184 |
|                             | 96144_at    | <a href="#">15904</a>  | <b>Idb4</b>    | inhibitor of DNA binding 4                                     | 0.53;0.43;0.41 | 8.5875e-08;1.0497e-09;4.5221e-10 |
|                             | 94774_at    | <a href="#">26388</a>  | <b>Ifi202b</b> | interferon activated gene 202B                                 | 0.51;0.61;0.48 | 1.2854e-06;0.00016999;7.0124e-07 |
|                             | 160092_at   | <a href="#">15982</a>  | <b>Ifrd1</b>   | interferon-related developmental regulator 1                   | 2.26;1.8;1.82  | 3.9913e-08;1.1238e-05;8.8047e-06 |



| Function                    | Affy ID    | Locus ID               | Gene symbol    | Description                                                                        | Fold change    | p-value                          |
|-----------------------------|------------|------------------------|----------------|------------------------------------------------------------------------------------|----------------|----------------------------------|
| Regulation of transcription | 100130_at  | <a href="#">16476</a>  | <b>Jun</b>     | Jun oncogene                                                                       | 1.57;1.61;1.65 | 1.1648e-10;8.3976e-11;3.2086e-11 |
|                             | 102364_at  | <a href="#">16478</a>  | <b>Jund1</b>   | Jun proto-oncogene related gene d1                                                 | 0.63;0.8;0.74  | 1.2216e-06;0.00614997;0.00056188 |
|                             | 99622_at   | <a href="#">16600</a>  | <b>Klf4</b>    | Kruppel-like factor 4 (gut)                                                        | 1.91;2.66;2.35 | 3.7798e-05;1.6141e-07;1.3291e-06 |
|                             | 92564_at   | <a href="#">16978</a>  | <b>Lrrfip1</b> | leucine rich repeat (in FLII) interacting protein 1                                | 2.64;2.36;1.96 | 3.7651e-10;7.9552e-09;5.1678e-07 |
|                             | 95379_at   | <a href="#">23937</a>  | <b>Mab21I2</b> | mab-21-like 2 (C. elegans)                                                         | 0.56;0.49;0.58 | 2.4577e-10;1.1704e-11;1.4265e-09 |
|                             | 99024_at   | <a href="#">17122</a>  | <b>Mad4</b>    | Max dimerization protein 4                                                         | 0.46;0.51;0.48 | 9.9977e-12;4.5660e-10;1.0017e-10 |
|                             | 104220_at  | <a href="#">17130</a>  | <b>Madh6</b>   | MAD homolog 6 (Drosophila)                                                         | 0.58;0.62;0.63 | 3.3233e-12;9.3438e-11;1.7821e-10 |
|                             | 96703_at   | <a href="#">94275</a>  | <b>Maged1</b>  | melanoma antigen, family D, 1                                                      | 0.6;0.6;0.61   | 1.0185e-10;1.7649e-10;2.7891e-10 |
|                             | 98110_at   | <a href="#">17246</a>  | <b>Mdm2</b>    | transformed mouse 3T3 cell double minute 2                                         | 1.58;1.87;1.87 | 1.0225e-07;9.5069e-10;8.3754e-10 |
|                             | 98790_s_at | <a href="#">17268</a>  | <b>Meis1</b>   | myeloid ecotropic viral integration site 1                                         | 0.58;0.57;0.56 | 1.0121e-09;1.8164e-09;9.6661e-10 |
|                             | 103779_at  | <a href="#">223701</a> | <b>Mk11</b>    | megakaryoblastic leukemia (translocation) 1 homolog (human)                        | 0.64;0.58;0.6  | 8.0553e-11;3.1268e-12;9.4145e-12 |
|                             | 98979_at   | <a href="#">17420</a>  | <b>Mnat1</b>   | menage a trois 1                                                                   | 0.58;0.64;0.59 | 5.6839e-08;2.2131e-06;2.3442e-07 |
|                             | 92300_at   | <a href="#">17428</a>  | <b>Mnt</b>     | max binding protein                                                                | 0.53;0.65;0.7  | 4.9768e-09;6.2203e-06;5.1241e-05 |
|                             | 92753_at   | <a href="#">17537</a>  | <b>Mrg2</b>    | myeloid ecotropic viral integration site-related gene 2                            | 0.64;0.78;0.8  | 1.4315e-07;0.00051288;0.00143221 |
|                             | 100023_at  | <a href="#">17865</a>  | <b>Mybl2</b>   | myeloblastosis oncogene-like 2                                                     | 1.58;1.52;1.43 | 1.7916e-10;1.8112e-09;3.9551e-08 |
|                             | 104712_at  | <a href="#">17869</a>  | <b>Myc</b>     | myelocytomatosis oncogene                                                          | 2.16;1.89;1.86 | 7.1266e-06;0.00014138;0.00018854 |
|                             | 100962_at  | <a href="#">17937</a>  | <b>Nab2</b>    | Ngfi-A binding protein 2                                                           | 0.71;0.59;0.61 | 0.00023112;1.7485e-06;4.6083e-06 |
|                             | 103791_at  | <a href="#">74838</a>  | <b>Narg1</b>   | NMDA receptor-regulated gene 1                                                     | 1.74;1.57;1.43 | 3.2759e-07;1.3459e-05;0.00020755 |
|                             | 160859_s_a | <a href="#">18028</a>  | <b>Nfib</b>    | nuclear factor I/B                                                                 | 0.45;0.63;0.56 | 2.1146e-06;0.00198121;0.00020248 |
|                             | 100307_at  | <a href="#">18032</a>  | <b>Nfix</b>    | nuclear factor I/X                                                                 | 0.51;0.7;0.64  | 5.338e-06;0.0077796;0.0010470    |
|                             | 101554_at  | <a href="#">18035</a>  | <b>Nfkbia</b>  | nuclear factor of kappa light chain gene enhancer in B-cells inhibitor, alpha      | 1.41;2.02;2.19 | 6.5687e-10;6.3942e-16;< 2.22e-16 |
|                             | 98988_at   | <a href="#">80859</a>  | <b>Nfkbiz</b>  | nuclear factor of kappa light polypeptide gene enhancer in B-cells inhibitor, zeta | 1.69;2.83;2.59 | 1.4671e-05;4.0981e-10;2.1647e-09 |
|                             | 103048_at  | <a href="#">18109</a>  | <b>Nmyc1</b>   | neuroblastoma myc-related oncogene 1                                               | 1.54;1.61;1.31 | 1.5905e-05;7.7360e-06;0.0033130  |
|                             | 99564_at   | <a href="#">18140</a>  | <b>Np95</b>    | nuclear protein 95                                                                 | 1.87;1.81;1.64 | 2.3631e-06;9.2573e-06;9.2588e-05 |
|                             | 99076_at   | <a href="#">353187</a> | <b>Nr1d2</b>   | nuclear receptor subfamily 1, group D, member 2                                    | 1.26;1.83;1.73 | 0.0012535;3.8891e-09;2.0815e-08  |
|                             | 102371_at  | <a href="#">15370</a>  | <b>Nr4a1</b>   | nuclear receptor subfamily 4, group A, member 1                                    | 3.23;2;2.58    | 5.5814e-13;3.1347e-08;9.4145e-11 |

| Function                    | Affy ID     | Locus ID               | Gene symbol    | Description                                                | Fold change    | p-value                          |
|-----------------------------|-------------|------------------------|----------------|------------------------------------------------------------|----------------|----------------------------------|
| Regulation of transcription | 93615_at    | <a href="#">18516</a>  | <b>Pbx3</b>    | pre B-cell leukemia transcription factor 3                 | 1.59;1.52;1.24 | 0.00025182;0.00096051;0.06249960 |
|                             | 93619_at    | <a href="#">18626</a>  | <b>Per1</b>    | period homolog 1 (Drosophila)                              | 0.55;0.59;0.57 | 9.2718e-13;3.4698e-11;6.2797e-12 |
|                             | 104491_at   | <a href="#">68770</a>  | <b>Phtf2</b>   | putative homeodomain transcription factor 2                | 1.66;1.29;1.28 | 2.0866e-09;0.00011705;0.00020023 |
|                             | 160615_at   | <a href="#">229615</a> | <b>Pias3</b>   | protein inhibitor of activated STAT 3                      | 0.62;0.77;0.72 | 7.955e-07;0.00203520;0.00024886  |
|                             | 93325_at    | <a href="#">66420</a>  | <b>Polr2e</b>  | polymerase (RNA) II (DNA directed) polypeptide E           | 1.31;1.51;1.26 | 0.0025186;6.2924e-05;0.0104956   |
|                             | 104304_r_at | <a href="#">67005</a>  | <b>Polr3k</b>  | polymerase (RNA) III (DNA directed) polypeptide K          | 1.6;1.56;1.38  | 0.00065267;0.00171916;0.01639016 |
|                             | 160793_at   | <a href="#">19009</a>  | <b>Pou6f1</b>  | POU domain, class 6, transcription factor 1                | 0.66;0.77;0.73 | 1.9787e-09;8.0745e-06;3.7476e-07 |
|                             | 103327_at   | <a href="#">20204</a>  | <b>Prrx2</b>   | paired related homeobox 2                                  | 0.31;0.31;0.36 | 4.8897e-12;1.7017e-11;1.5138e-10 |
|                             | 92901_at    | <a href="#">19401</a>  | <b>Rara</b>    | retinoic acid receptor, alpha                              | 0.46;0.52;0.53 | 3.0885e-07;9.0358e-06;1.1677e-05 |
|                             | 96781_at    | <a href="#">106298</a> | <b>Rrn3</b>    | RRN3 RNA polymerase I transcription factor homolog (yeast) | 1.57;1.41;1.28 | 2.1037e-05;0.00071227;0.01087688 |
|                             | 92399_at    | <a href="#">12394</a>  | <b>Runx1</b>   | runt related transcription factor 1                        | 1.66;1.98;1.61 | 1.9398e-08;1.9053e-10;1.1237e-07 |
|                             | 92722_f_at  | <a href="#">20471</a>  | <b>Six1</b>    | sine oculis-related homeobox 1 homolog (Drosophila)        | 0.25;0.22;0.2  | 9.7255e-14;6.4005e-14;1.7322e-14 |
|                             | 92999_at    | <a href="#">20474</a>  | <b>Six4</b>    | sine oculis-related homeobox 4 homolog (Drosophila)        | 0.53;0.51;0.47 | 1.0728e-09;7.5546e-10;9.3930e-11 |
|                             | 102384_at   | <a href="#">67155</a>  | <b>Smarca2</b> | subunit of the SWI/SNF chromatin remodeling complex        | 0.36;0.5;0.39  | 9.7934e-09;1.0086e-05;8.1614e-08 |
|                             | 99552_at    | <a href="#">20583</a>  | <b>Snai2</b>   | snail homolog 2 (Drosophila)                               | 0.52;0.59;0.61 | 2.4290e-11;3.5561e-09;9.5730e-09 |
|                             | 96260_at    | <a href="#">56463</a>  | <b>Snd1</b>    | staphylococcal nuclease domain containing 1                | 0.61;0.59;0.6  | 6.3724e-09;6.7419e-09;1.0621e-08 |
|                             | 95069_at    | <a href="#">20833</a>  | <b>Ssrp1</b>   | structure specific recognition protein 1                   | 1.65;1.64;1.47 | 3.0832e-09;7.7409e-09;5.2481e-07 |
|                             | 99099_at    | <a href="#">20848</a>  | <b>Stat3</b>   | signal transducer and activator of transcription 3         | 0.62;0.61;0.7  | 1.2572e-09;2.2872e-09;4.1497e-07 |
|                             | 103746_at   | <a href="#">52615</a>  | <b>Suz12</b>   | suppressor of zeste 12 homolog (Drosophila)                | 1.84;1.97;1.74 | 9.8792e-06;3.7107e-06;5.3532e-05 |
|                             | 103889_at   | <a href="#">99912</a>  | <b>Tbl1xr1</b> | transducin (beta)-like 1X-linked receptor 1                | 0.67;0.78;0.65 | 9.9534e-05;0.010027;4.9521e-05   |
|                             | 100354_at   | <a href="#">21383</a>  | <b>Tbx14</b>   | T-box 14                                                   | 0.51;0.54;0.52 | 1.2123e-07;1.0490e-06;4.3363e-07 |
|                             | 102256_at   | <a href="#">21384</a>  | <b>Tbx15</b>   | T-box 15                                                   | 0.54;0.48;0.48 | 1.0597e-08;7.6736e-10;1.0163e-09 |
|                             | 102344_s_a  | <a href="#">21401</a>  | <b>Tcea3</b>   | transcription elongation factor A (SII), 3                 | 0.64;0.69;0.67 | 5.6786e-08;2.8980e-06;9.3769e-07 |
|                             | 101008_at   | <a href="#">56070</a>  | <b>Tcerg1</b>  | transcription elongation regulator 1 (CA150)               | 1.53;1.36;1.2  | 0.00012409;0.00407763;0.06446105 |
|                             | 102354_at   | <a href="#">106795</a> | <b>Tcf19</b>   | transcription factor 19                                    | 1.93;1.93;1.75 | 1.0233e-05;1.6775e-05;0.00013473 |
|                             | 160780_at   | <a href="#">21415</a>  | <b>Tcf3</b>    | transcription factor 3                                     | 0.65;0.66;0.59 | 3.3589e-06;8.1498e-06;3.0537e-07 |

| Function                      | Affy ID        | Locus ID               | Gene symbol            | Description                                                               | Fold change                                       | p-value                          |
|-------------------------------|----------------|------------------------|------------------------|---------------------------------------------------------------------------|---------------------------------------------------|----------------------------------|
| Regulation of transcription   | 160483_at      | <a href="#">21413</a>  | <b>Tcf4</b>            | transcription factor 4                                                    | 0.77;0.69;0.66                                    | 0.00080502;2.0528e-05;3.8171e-06 |
|                               | 101959_r_at    | <a href="#">21781</a>  | <b>Tfdp1</b>           | transcription factor Dp 1                                                 | 1.56;1.31;1.29                                    | 4.3554e-06;0.0021808;0.0035364   |
|                               | 101502_at      | <a href="#">21815</a>  | <b>Tgif</b>            | TG interacting factor                                                     | 1.71;1.69;1.67                                    | 1.3089e-08;4.6017e-08;6.6716e-08 |
|                               | 92348_at       | <a href="#">21833</a>  | <b>Thra</b>            | thyroid hormone receptor alpha                                            | 0.51;0.51;0.55                                    | 2.9785e-13;5.9202e-13;5.8677e-12 |
|                               | 101372_at      | <a href="#">69716</a>  | <b>Trip13</b>          | thyroid hormone receptor interactor 13                                    | 1.88;1.81;1.81                                    | 3.3254e-07;1.6888e-06;1.6818e-06 |
|                               | 104154_at      | <a href="#">22059</a>  | <b>Trp53</b>           | transformation related protein 53                                         | 1.35;1.59;1.51                                    | 3.6025e-05;1.0676e-07;7.8102e-07 |
|                               | 98028_at       | <a href="#">22160</a>  | <b>Twist1</b>          | twist gene homolog 1 (Drosophila)                                         | 0.62;0.67;0.65                                    | 1.3548e-07;5.0924e-06;1.1209e-06 |
|                               | 99964_at       | <a href="#">22337</a>  | <b>Vdr</b>             | vitamin D receptor                                                        | 0.43;0.44;0.44                                    | 2.1270e-09;5.9743e-09;6.8457e-09 |
|                               | 92480_f_at     | <a href="#">24132</a>  | <b>Zfp118</b>          | Zinc finger protein 118                                                   | 1.52;1.75;1.5                                     | 5.7494e-05;2.1072e-06;0.00013935 |
|                               | 92934_at       | <a href="#">22751</a>  | <b>Zfp90</b>           | zinc finger protein 90                                                    | 0.67;0.66;0.65                                    | 2.1003e-05;1.4833e-05;9.5780e-06 |
|                               | 92355_at       | <a href="#">22762</a>  | <b>Zfpm2</b>           | zinc finger protein, multitype 2                                          | 1.35;1.64;1.46                                    | 1.3506e-06;3.9267e-10;5.2592e-08 |
|                               | 160848_at      | <a href="#">22770</a>  | <b>Zhx1</b>            | zinc fingers and homeoboxes protein 1                                     | 0.55;0.65;0.53                                    | 1.8892e-09;1.0493e-06;1.7529e-09 |
|                               | 96707_at       | <a href="#">22697</a>  | <b>Zipro1</b>          | zinc finger proliferation 1                                               | 0.56;0.65;0.63                                    | 1.0996e-12;8.8886e-10;2.8420e-10 |
|                               | RNA metabolism | 104399_at              | <a href="#">108062</a> | <b>Cstf2</b>                                                              | cleavage stimulation factor, 3' pre-RNA subunit 2 | 1.57;1.5;1.3                     |
| mRNA synthesis and processing | 104126_at      | <a href="#">83410</a>  | <b>Cstf2t</b>          | cleavage stimulation factor, 3' pre-RNA subunit 2, tau                    | 0.69;0.71;0.62                                    | 5.3751e-05;0.00017837;2.3337e-06 |
|                               | 160141_r_at    | <a href="#">110809</a> | <b>Sfrs1</b>           | splicing factor, arginine/serine-rich 1 (ASF/SF2)                         | 1.5;1.34;1.08                                     | 9.7234e-05;0.0030466;0.3903750   |
|                               | 160377_at      | <a href="#">97174</a>  | <b>Tardbp</b>          | TAR DNA binding protein                                                   | 1.51;1.4;1.33                                     | 0.00044762;0.00389451;0.01210598 |
|                               | 95732_at       | <a href="#">66125</a>  | <b>Sf3b5</b>           | splicing factor 3b, subunit 5                                             | 1.42;1.52;1.33                                    | 0.00067536;0.00016127;0.00531412 |
|                               | 101506_at      | <a href="#">68981</a>  | <b>Snrpa1</b>          | small nuclear ribonucleoprotein polypeptide A'                            | 2.04;1.92;1.68                                    | 7.7768e-05;0.00035503;0.00284476 |
|                               | 96038_at       | <a href="#">319714</a> | <b>Rnase4</b>          | ribonuclease, RNase A family 4                                            | 0.46;0.65;0.73                                    | 2.6111e-05;0.010888;0.053641     |
|                               | 104610_at      | <a href="#">226169</a> | <b>Pprc1</b>           | Peroxisome proliferative activated receptor, gamma, coactivator-related 1 | 1.53;1.34;1.19                                    | 0.00083296;0.01738228;0.14634258 |
|                               | 94455_at       | <a href="#">67678</a>  | <b>Lsm3</b>            | U6 small nuclear RNA associated                                           | 1.88;1.75;1.53                                    | 7.7031e-07;9.0208e-06;0.00025695 |
|                               | 93008_at       | <a href="#">50783</a>  | <b>Lsm4</b>            | U6 snRNA-associated SM-like protein 4                                     | 1.74;1.74;1.65                                    | 3.4107e-06;7.0859e-06;2.6874e-05 |
|                               | 102409_at      | <a href="#">76522</a>  | <b>Lsm8</b>            | LSM8 homolog, U6 small nuclear RNA associated                             | 1.71;1.91;1.59                                    | 1.7656e-05;2.5042e-06;0.00019258 |
|                               | 103029_at      | <a href="#">18569</a>  | <b>Pdcd4</b>           | programmed cell death 4                                                   | 0.3;0.41;0.34                                     | 1.4179e-10;5.6751e-08;1.8472e-09 |
|                               | 95649_at       | <a href="#">68479</a>  | <b>Phf5a</b>           | PHD finger protein 5A                                                     | 1.68;1.54;1.42                                    | 3.6145e-07;9.9182e-06;0.00012506 |

| Function                      | Affy ID     | Locus ID               | Gene symbol   | Description                                                          | Fold change    | p-value                          |
|-------------------------------|-------------|------------------------|---------------|----------------------------------------------------------------------|----------------|----------------------------------|
| <b>RNA metabolism</b>         | 95677_at    | <a href="#">66585</a>  | <b>Prp8bp</b> | U5 snRNP-specific protein (Prp8-binding)                             | 1.67;1.54;1.46 | 1.5853e-07;4.2634e-06;2.6617e-05 |
| mRNA synthesis and processing | 96029_at    | <a href="#">75062</a>  | <b>Sf3a3</b>  | splicing factor 3a, subunit 3, 60kDa                                 | 1.5;1.42;1.34  | 3.7746e-06;4.2236e-05;0.00035744 |
|                               | 100577_at   | <a href="#">20641</a>  | <b>Snrpd1</b> | small nuclear ribonucleoprotein D1                                   | 1.46;1.52;1.33 | 0.00064639;0.00037611;0.00999292 |
|                               | 95049_at    | <a href="#">107686</a> | <b>Snrpd2</b> | small nuclear ribonucleoprotein D2                                   | 1.79;1.68;1.48 | 1.3273e-05;0.00010506;0.00177064 |
|                               | 98077_at    | <a href="#">67332</a>  | <b>Snrpd3</b> | small nuclear ribonucleoprotein D3                                   | 1.59;1.52;1.47 | 0.00024621;0.00095799;0.00217753 |
|                               | 103969_at   | <a href="#">20817</a>  | <b>Srpk2</b>  | serine/arginine-rich protein specific kinase 2                       | 0.53;0.63;0.56 | 3.2539e-08;8.2681e-06;3.8198e-07 |
|                               | 160471_at   | <a href="#">20492</a>  | <b>Slbp</b>   | stem-loop binding protein                                            | 1.93;2.08;1.69 | 1.3608e-06;5.1512e-07;5.3502e-05 |
|                               | 93892_at    | <a href="#">14007</a>  | <b>Cugbp2</b> | CUG triplet repeat, RNA binding protein 2                            | 0.62;0.66;0.62 | 1.2101e-06;1.7451e-05;2.0722e-06 |
|                               | 93518_at    | <a href="#">19826</a>  | <b>Rnps1</b>  | ribonucleic acid binding protein S1                                  | 1.63;1.55;1.47 | 6.7795e-11;1.5409e-09;1.3992e-08 |
|                               | 160429_at   | <a href="#">56488</a>  | <b>Nxt1</b>   | NTF2-related export protein 1                                        | 2.15;2.06;2.16 | 3.0451e-09;1.7390e-08;6.1514e-09 |
|                               | 160192_at   | <a href="#">19656</a>  | <b>Rbmxt</b>  | RNA binding motif protein, X chromosome retrogene                    | 1.66;1.67;1.53 | 3.4800e-06;5.2555e-06;6.2984e-05 |
|                               | 160633_at   | <a href="#">21681</a>  | <b>Refbp1</b> | RNA and export factor binding protein 1                              | 1.85;1.65;1.57 | 7.3270e-07;2.5328e-05;9.9415e-05 |
|                               | 104303_i_at | <a href="#">67005</a>  | <b>Poir3k</b> | polymerase (RNA) III (DNA directed) polypeptide K                    | 1.63;1.64;1.41 | 5.6081e-05;8.7355e-05;0.0031478  |
| rRNA synthesis and processing | 94361_at    | <a href="#">56200</a>  | <b>Ddx21</b>  | DEAD/H (Asp-Glu-Ala-Asp/His) box polypeptide 21 (RNA helicase II/Gu) | 1.71;1.53;1.48 | 2.6133e-09;3.5070e-07;1.1680e-06 |
|                               | 160878_at   | <a href="#">12181</a>  | <b>Bop1</b>   | block of proliferation 1                                             | 1.84;1.7;1.57  | 1.0630e-09;3.2483e-08;4.2768e-07 |
|                               | 160503_at   | <a href="#">14113</a>  | <b>Fbl</b>    | fibrillarin                                                          | 1.61;1.53;1.45 | 1.8258e-08;2.5999e-07;2.0250e-06 |
|                               | 95756_at    | <a href="#">56095</a>  | <b>Ftsj3</b>  | FtsJ homolog 3                                                       | 1.81;1.65;1.41 | 4.6595e-06;7.5201e-05;0.0030554  |
|                               | 98531_g_at  | <a href="#">14455</a>  | <b>Gas5</b>   | growth arrest specific 5                                             | 0.5;0.62;0.52  | 2.1744e-09;2.4630e-06;1.6163e-08 |
|                               | 96804_at    | <a href="#">110109</a> | <b>Nol1</b>   | nucleolar protein 1                                                  | 1.82;1.62;1.58 | 3.1540e-13;5.9001e-11;1.9161e-10 |
|                               | 92569_f_at  | <a href="#">55989</a>  | <b>Nol5</b>   | nucleolar protein 5                                                  | 1.88;1.57;1.43 | 8.9182e-07;0.00013373;0.00143720 |
|                               | 104766_at   | <a href="#">68147</a>  | <b>Nola1</b>  | nucleolar protein family A, member 1 (H/ACA small nucleolar RNPs)    | 1.51;1.41;1.37 | 1.4252e-05;0.00020120;0.00057371 |
|                               | 97824_at    | <a href="#">52530</a>  | <b>Nola2</b>  | nucleolar protein family A, member 2                                 | 2.69;2.51;2.53 | 3.5986e-09;2.7336e-08;2.4154e-08 |
|                               | 99194_at    | <a href="#">71701</a>  | <b>Pnpt1</b>  | 3'-5' RNA exonuclease polynucleotide phosphorylase                   | 1.6;1.68;1.43  | 2.8430e-08;1.0204e-08;4.8263e-06 |
|                               | 98923_at    | <a href="#">59028</a>  | <b>Rcl1</b>   | RNA terminal phosphate cyclase-like 1                                | 1.55;1.56;1.39 | 1.1630e-06;1.6899e-06;8.3987e-05 |
|                               | 98021_at    | <a href="#">64424</a>  | <b>Poir1e</b> | polymerase (RNA) I polypeptide E                                     | 1.57;1.49;1.38 | 8.9531e-10;1.6161e-08;6.0282e-07 |
|                               | 100037_at   | <a href="#">66942</a>  | <b>Ddx18</b>  | DEAD (Asp-Glu-Ala-Asp) box polypeptide 18                            | 1.46;1.57;1.4  | 4.7496e-06;6.2204e-07;3.8318e-05 |

| Function                      | Affy ID     | Locus ID               | Gene symbol  | Description                                                   | Fold change    | p-value                          |
|-------------------------------|-------------|------------------------|--------------|---------------------------------------------------------------|----------------|----------------------------------|
| rRNA synthesis and processing | 98938_at    | <a href="#">68209</a>  | <b>AYP1</b>  | RNase H1 small subunit                                        | 1.47;1.72;1.58 | 8.8575e-06;8.5572e-08;1.2231e-06 |
|                               | 100138_f_at | <a href="#">56275</a>  | <b>Rbm14</b> | RNA binding motif protein 14                                  | 1.57;1.45;1.27 | 3.7331e-07;1.4537e-05;0.0015650  |
|                               | 92517_at    | <a href="#">56516</a>  | <b>Rbms2</b> | RNA binding motif, single stranded interacting protein 2      | 0.6;0.67;0.67  | 7.2340e-08;5.0902e-06;7.0393e-06 |
|                               | 98624_at    | <a href="#">56190</a>  | <b>Rnpc1</b> | RNA-binding region (RNP1, RRM) containing 1                   | 1.81;1.96;2    | 1.4799e-10;3.0106e-11;1.5905e-11 |
| <b>Metabolism</b>             | 96346_at    | <a href="#">12583</a>  | <b>Cdo1</b>  | cysteine dioxygenase 1, cytosolic                             | 0.12;0.17;0.18 | 9.7282e-14;1.1341e-11;2.3285e-11 |
| Amino acid metabolism         | 160350_at   | <a href="#">14874</a>  | <b>Gstz1</b> | glutathione transferase zeta 1 (maleylacetoacetate isomerase) | 0.6;0.7;0.64   | 5.1513e-10;8.3115e-07;2.2361e-08 |
|                               | 104547_at   | <a href="#">13361</a>  | <b>Dhfr</b>  | dihydrofolate reductase                                       | 1.64;1.57;1.58 | 2.3341e-08;2.5008e-07;1.9757e-07 |
|                               | 96295_at    | <a href="#">107272</a> | <b>Psat1</b> | phosphoserine aminotransferase 1                              | 1.51;1.3;1.25  | 0.00044702;0.02062371;0.04355673 |
|                               | 102022_at   | <a href="#">73724</a>  | <b>Mcee</b>  | methylmalonyl CoA epimerase                                   | 0.61;0.84;0.74 | 4.4492e-06;0.0510682;0.0021588   |
|                               | 160844_at   | <a href="#">19286</a>  | <b>Pts</b>   | 6-pyruvoyl-tetrahydropterin synthase                          | 0.62;0.67;0.65 | 6.7857e-07;1.2801e-05;3.8814e-06 |
|                               | 96763_at    | <a href="#">192166</a> | <b>Sardh</b> | sarcosine dehydrogenase                                       | 0.65;0.65;0.68 | 2.9935e-09;5.6179e-09;3.9190e-08 |
|                               | 93488_at    | <a href="#">27364</a>  | <b>Srr</b>   | serine racemase                                               | 1.7;1.46;1.38  | 2.2441e-07;5.1250e-05;0.00032439 |
| Carbohydrate metabolism       | 94815_at    | <a href="#">12183</a>  | <b>Bpgm</b>  | 2,3-bisphosphoglycerate mutase                                | 1.28;1.7;1.52  | 0.007638;4.3455e-06;9.9365e-05   |
|                               | 93582_at    | <a href="#">12850</a>  | <b>Coq7</b>  | demethyl-Q 7                                                  | 1.49;1.72;1.75 | 1.7824e-05;3.9366e-07;2.4156e-07 |
|                               | 101294_g_a  | <a href="#">14380</a>  | <b>G6pd2</b> | glucose-6-phosphate dehydrogenase 2                           | 1.27;1.52;1.39 | 0.00295764;1.2198e-05;0.00024172 |
|                               | 160516_at   | <a href="#">14387</a>  | <b>Gaa</b>   | glucosidase, alpha, acid                                      | 0.64;0.73;0.83 | 2.5886e-07;6.7676e-05;0.0083571  |
|                               | 160121_at   | <a href="#">69976</a>  | <b>Galk2</b> | galactokinase 2                                               | 0.59;0.72;0.72 | 7.5436e-09;2.6480e-05;2.2823e-05 |
|                               | 101214_f_at | <a href="#">14433</a>  | <b>Gapd</b>  | glyceraldehyde-3-phosphate dehydrogenase                      | 1.46;1.51;1.35 | 1.2181e-10;5.9815e-11;2.4440e-08 |
|                               | 100488_at   | <a href="#">14466</a>  | <b>Gba</b>   | glucosidase, beta, acid                                       | 0.66;0.83;0.95 | 8.0422e-05;0.050273;0.567398     |
|                               | 96803_at    | <a href="#">74185</a>  | <b>Gbe1</b>  | glucan (1,4-alpha-), branching enzyme 1                       | 1.49;1.6;1.4   | 0.00231644;0.00076589;0.01157655 |
|                               | 100565_at   | <a href="#">26384</a>  | <b>Gnpi</b>  | glucosamine-6-phosphate deaminase 1                           | 0.63;0.96;0.99 | 1.0399e-05;0.66002;0.94373       |
|                               | 98931_at    | <a href="#">75612</a>  | <b>Gns</b>   | glucosamine (N-acetyl)-6-sulfatase                            | 0.58;0.72;0.82 | 1.256e-06;0.00093185;0.03104001  |
|                               | 98984_f_at  | <a href="#">14571</a>  | <b>Gpd2</b>  | glycerol phosphate dehydrogenase 2, mitochondrial             | 1.65;2.06;1.83 | 3.5478e-08;8.6347e-11;2.8030e-09 |
|                               | 97525_at    | <a href="#">14933</a>  | <b>Gyk</b>   | glycerol kinase                                               | 1.51;1.43;1.41 | 5.2393e-11;2.0508e-09;3.3832e-09 |
|                               | 160571_at   | <a href="#">15926</a>  | <b>Idh1</b>  | isocitrate dehydrogenase 1 (NADP+), soluble                   | 0.37;0.46;0.44 | 3.8265e-11;7.3288e-09;3.0086e-09 |
|                               | 94375_at    | <a href="#">15277</a>  | <b>Hk2</b>   | hexokinase 2                                                  | 2.09;1.81;1.94 | 9.2950e-09;7.5906e-07;1.2578e-07 |
|                               | 96072_at    | <a href="#">16828</a>  | <b>Ldh1</b>  | lactate dehydrogenase 1, A chain                              | 1.92;1.85;1.58 | 5.0196e-11;3.6138e-10;6.9587e-08 |

| Function                | Affy ID     | Locus ID               | Gene symbol     | Description                                                           | Fold change    | p-value                          |
|-------------------------|-------------|------------------------|-----------------|-----------------------------------------------------------------------|----------------|----------------------------------|
| <b>Metabolism</b>       | 104628_at   | <a href="#">17158</a>  | <b>Man2a1</b>   | mannosidase 2, alpha 1                                                | 0.65;0.56;0.57 | 2.5939e-08;2.5809e-10;4.2545e-10 |
| Carbohydrate metabolism | 97398_at    | <a href="#">74551</a>  | <b>Pck2</b>     | phosphoenolpyruvate carboxykinase 2                                   | 0.6;0.57;0.53  | 3.6790e-08;9.3454e-09;1.4622e-09 |
|                         | 92637_at    | <a href="#">18641</a>  | <b>Pfkf</b>     | phosphofructokinase, liver, B-type                                    | 1.25;1.51;1.01 | 0.00072995;3.5743e-07;0.85754318 |
|                         | 160091_at   | <a href="#">18648</a>  | <b>Pgam1</b>    | phosphoglycerate mutase 1                                             | 1.56;1.65;1.39 | 3.9984e-09;1.1512e-09;1.1904e-06 |
|                         | 93346_at    | <a href="#">18655</a>  | <b>Pgk1</b>     | phosphoglycerate kinase 1                                             | 1.55;1.62;1.33 | 1.3913e-08;5.2487e-09;1.9605e-05 |
|                         | 97489_at    | <a href="#">110078</a> | <b>Pygb</b>     | brain glycogen phosphorylase                                          | 0.57;0.62;0.59 | 1.4502e-07;3.0076e-06;8.0261e-07 |
|                         | 93738_at    | <a href="#">20525</a>  | <b>Slc2a1</b>   | solute carrier family 2 (facilitated glucose transporter), member 1   | 1.58;1.49;1.43 | 7.8051e-09;1.6633e-07;9.0816e-07 |
|                         | 104413_at   | <a href="#">242585</a> | <b>Slc35d1</b>  | solute carrier family 35, member D1                                   | 1.91;1.66;1.75 | 1.4359e-09;2.3113e-07;4.3811e-08 |
|                         | 94216_at    | <a href="#">66052</a>  | <b>Sdhc</b>     | succinate dehydrogenase complex, subunit C, integral membrane protein | 0.66;0.85;0.78 | 1.4023e-08;0.0032225;4.7255e-05  |
|                         | 95066_at    | <a href="#">21351</a>  | <b>Taldo1</b>   | transaldolase 1                                                       | 1.75;1.99;1.9  | 3.1184e-10;1.0728e-11;4.3229e-11 |
| Glutathione metabolism  | 160335_at   | <a href="#">14630</a>  | <b>Gclm</b>     | glutamate-cysteine ligase, modifier subunit                           | 1.37;1.5;1.43  | 6.3448e-05;3.9073e-06;2.3883e-05 |
|                         | 160646_at   | <a href="#">14782</a>  | <b>Gsr</b>      | glutathione reductase 1                                               | 1.69;1.67;1.64 | 2.9095e-08;9.8841e-08;1.6784e-07 |
|                         | 96085_at    | <a href="#">14860</a>  | <b>Gsta4</b>    | glutathione S-transferase, alpha 4                                    | 0.44;0.72;0.59 | 8.2664e-11;0.00030913;6.0465e-07 |
|                         | 96258_at    | <a href="#">66447</a>  | <b>Mgst3</b>    | microsomal glutathione S-transferase 3                                | 0.49;0.88;0.83 | 2.4868e-07;0.242287;0.089993     |
|                         | 102094_f_at | <a href="#">14862</a>  | <b>Gstm1</b>    | glutathione S-transferase, mu 1                                       | 0.26;0.41;0.32 | 1.9429e-14;1.4851e-10;1.3950e-12 |
|                         | 93009_at    | <a href="#">14863</a>  | <b>Gstm2</b>    | glutathione S-transferase, mu 2                                       | 0.44;0.55;0.5  | 4.2280e-09;1.9440e-06;1.6882e-07 |
|                         | 97681_f_at  | <a href="#">14864</a>  | <b>Gstm3</b>    | glutathione S-transferase, mu 3                                       | 0.53;0.62;0.56 | 3.6912e-13;2.5364e-10;5.5546e-12 |
|                         | 100629_at   | <a href="#">14866</a>  | <b>Gstm5</b>    | glutathione S-transferase, mu 5                                       | 0.42;0.59;0.52 | 2.2918e-12;6.4724e-08;9.7648e-10 |
|                         | 97819_at    | <a href="#">14873</a>  | <b>Gsto1</b>    | glutathione S-transferase omega 1                                     | 2.21;2.41;2.84 | 3.2888e-15;8.9653e-16;< 2.22e-16 |
| Electron transporter    | 100568_at   | <a href="#">24015</a>  | <b>Abce1</b>    | ATP-binding cassette, sub-family E (OABP), member 1                   | 1.74;1.41;1.41 | 2.7292e-08;5.4472e-05;5.8826e-05 |
|                         | 93845_at    | <a href="#">27407</a>  | <b>Abcf2</b>    | ATP-binding cassette, sub-family F (GCN20), member 2                  | 1.56;1.46;1.46 | 3.5493e-14;2.9869e-12;2.1772e-12 |
|                         | 160286_at   | <a href="#">218214</a> | <b>Aof1</b>     | amine oxidase, flavin containing 1                                    | 1.67;1.56;1.34 | 0.0004291;0.0023866;0.0356377    |
|                         | 103275_at   | <a href="#">11975</a>  | <b>Atp6v0a1</b> | ATPase, H+ transporting, lysosomal V0 subunit a isoform 1             | 0.6;0.64;0.78  | 6.7410e-06;8.9152e-05;0.012910   |
|                         | 92603_at    | <a href="#">11972</a>  | <b>Atp6v0d1</b> | ATPase, H+ transporting, V0 subunit D isoform 1                       | 0.43;0.6;0.68  | 5.2081e-09;1.9884e-05;0.00070951 |
|                         | 95746_at    | <a href="#">11964</a>  | <b>Atp6v1a1</b> | ATPase, H+ transporting, V1 subunit A, isoform 1                      | 0.55;0.74;0.83 | 7.965e-06;0.012312;0.105990      |
|                         | 95656_i_at  | <a href="#">66144</a>  | <b>Atp6v1f</b>  | ATPase, H+ transporting, V1 subunit F                                 | 1.76;1.67;1.49 | 8.1112e-07;7.0821e-06;0.00016804 |
|                         | 98132_at    | <a href="#">13063</a>  | <b>Cycs</b>     | cytochrome c, somatic                                                 | 2.18;2.06;1.8  | 6.6381e-07;4.0899e-06;6.4559e-05 |
|                         | 99979_at    | <a href="#">13078</a>  | <b>Cyp1b1</b>   | cytochrome P450, family 1, subfamily b, polypeptide 1                 | 0.33;0.22;0.32 | 2.2348e-11;7.0039e-14;2.9078e-11 |
|                         | 160611_at   | <a href="#">102294</a> | <b>Cyp4v3</b>   | cytochrome P450, family 4, subfamily v, polypeptide 3                 | 0.57;0.7;0.71  | 1.1200e-06;0.00054137;0.00085302 |

| Function             | Affy ID               | Locus ID               | Gene symbol                                | Description                                                 | Fold change                      | p-value                          |
|----------------------|-----------------------|------------------------|--------------------------------------------|-------------------------------------------------------------|----------------------------------|----------------------------------|
| Metabolism           | 93749_at              | <a href="#">17161</a>  | <b>Maoa</b>                                | monoamine oxidase A                                         | 0.64;0.78;0.85                   | 4.6328e-05;0.014504;0.091659     |
| Electron transporter | 160237_at             | <a href="#">67130</a>  | <b>Ndufa6</b>                              | NADH dehydrogenase (ubiquinone) 1 alpha subcomplex, 6 (B14) | 0.62;0.89;0.75                   | 1.0256e-05;0.1992589;0.0046108   |
|                      | 94515_at              | <a href="#">59010</a>  | <b>Sqrdl</b>                               | sulfide quinone reductase-like (yeast)                      | 1.4;2.23;1.8                     | 0.00013943;4.3729e-10;1.0298e-07 |
|                      | 92807_at              | <a href="#">22166</a>  | <b>Txn1</b>                                | thioredoxin 1                                               | 1.37;1.51;1.37                   | 5.6268e-05;2.5627e-06;9.0346e-05 |
|                      | 99985_at              | <a href="#">50493</a>  | <b>Txnrd1</b>                              | thioredoxin reductase 1                                     | 1.77;1.72;1.63                   | 3.0160e-10;1.7187e-09;1.1363e-08 |
|                      | 97950_at              | <a href="#">22436</a>  | <b>Xdh</b>                                 | xanthine dehydrogenase                                      | 0.43;0.99;0.99                   | 0.000625;0.954339;0.948791       |
| Lipid metabolism     | 92581_at              | <a href="#">11364</a>  | <b>Acadm</b>                               | acetyl-Coenzyme A dehydrogenase, medium chain               | 0.56;0.61;0.64                   | 4.2167e-10;1.6484e-08;1.1441e-07 |
|                      | 94850_at              | <a href="#">64833</a>  | <b>Acot10</b>                              | acyl-CoA thioesterase 10                                    | 1.59;1.8;1.76                    | 3.0384e-07;1.2427e-08;2.1802e-08 |
|                      | 100539_at             | <a href="#">70025</a>  | <b>Acot7</b>                               | acyl-CoA thioesterase 7                                     | 1.39;1.57;1.47                   | 2.5680e-10;1.1588e-12;2.8692e-11 |
|                      | 160171_f_at           | <a href="#">56360</a>  | <b>Acot9</b>                               | acyl-CoA thioesterase 9                                     | 1.66;1.7;1.59                    | 1.0033e-09;8.6808e-10;1.0785e-08 |
|                      | 100931_at             | <a href="#">11883</a>  | <b>Arsa</b>                                | arylsulfatase A                                             | 0.33;0.47;0.48                   | 3.8613e-10;8.9930e-07;1.0945e-06 |
|                      | 100026_at             | <a href="#">12035</a>  | <b>Bcat1</b>                               | branched chain aminotransferase 1, cytosolic                | 1.5;1.29;1.37                    | 2.0137e-05;0.0040235;0.0006209   |
|                      | 93320_at              | <a href="#">12894</a>  | <b>Cpt1a</b>                               | carnitine palmitoyltransferase 1a, liver                    | 0.66;0.83;0.8                    | 7.3191e-08;0.00319984;0.00060124 |
|                      | 98533_at              | <a href="#">109672</a> | <b>Cyb5</b>                                | cytochrome b-5                                              | 0.55;0.73;0.62                   | 3.4944e-08;0.00037959;2.6703e-06 |
|                      | 160711_at             | <a href="#">67460</a>  | <b>Decr1</b>                               | 2,4-dienoyl CoA reductase 1, mitochondrial                  | 0.56;0.71;0.64                   | 2.7082e-09;2.0594e-05;6.5239e-07 |
|                      | 98989_at              | <a href="#">13360</a>  | <b>Dhcr7</b>                               | 7-dehydrocholesterol reductase                              | 0.48;0.46;0.49                   | 3.4188e-12;2.6366e-12;1.4363e-11 |
|                      | 102370_at             | <a href="#">114664</a> | <b>Dhrs8</b>                               | dehydrogenase/reductase (SDR family) member 8               | 0.35;0.51;0.53                   | 3.2081e-09;9.1488e-06;2.3354e-05 |
|                      | 93754_at              | <a href="#">51798</a>  | <b>Ech1</b>                                | enoyl coenzyme A hydratase 1, peroxisomal                   | 0.44;0.59;0.55                   | 4.8663e-14;7.2508e-10;6.3666e-11 |
|                      | 97456_at              | <a href="#">71879</a>  | <b>Facl5</b>                               | fatty acid Coenzyme A ligase, long chain 5                  | 1.42;1.54;1.32                   | 0.00016576;2.2111e-05;0.00249462 |
|                      | 102123_at             | <a href="#">16889</a>  | <b>Lip1</b>                                | lysosomal acid lipase 1                                     | 0.6;0.82;0.77                    | 5.3631e-07;0.0142504;0.0022718   |
|                      | 98865_at              | <a href="#">15117</a>  | <b>Has2</b>                                | hyaluronan synthase 2                                       | 1.87;1.14;1.23                   | 6.567e-08;0.130943;0.019215      |
|                      | 94325_at              | <a href="#">208715</a> | <b>Hmgcs1</b>                              | 3-hydroxy-3-methylglutaryl-Coenzyme A synthase 1            | 0.71;0.55;0.61                   | 2.1285e-08;1.7018e-12;6.7925e-11 |
|                      | 98892_at              | <a href="#">14245</a>  | <b>Lpin1</b>                               | lipin 1                                                     | 0.39;0.45;0.48                   | 8.1210e-09;2.5187e-07;1.1207e-06 |
|                      | 160737_at             | <a href="#">16987</a>  | <b>Lss</b>                                 | lanosterol synthase                                         | 0.69;0.63;0.68                   | 6.7958e-08;3.4976e-09;9.1358e-08 |
|                      | 160770_at             | <a href="#">192156</a> | <b>Mvd</b>                                 | mevalonate (diphospho) decarboxylase                        | 0.64;0.64;0.74                   | 6.0272e-08;1.0975e-07;3.8572e-05 |
|                      | 93316_at              | <a href="#">64291</a>  | <b>Osbpl1a</b>                             | oxysterol binding protein-like 1A                           | 0.62;0.85;0.7                    | 0.00015759;0.13931461;0.00343534 |
| 92845_at             | <a href="#">67041</a> | <b>Oxct</b>            | 3-oxoacid CoA transferase                  | 0.55;0.62;0.61                                              | 7.8808e-07;2.6556e-05;1.9175e-05 |                                  |
| 102049_at            | <a href="#">27273</a> | <b>Pdk4</b>            | pyruvate dehydrogenase kinase, isoenzyme 4 | 0.32;0.31;0.34                                              | 8.6601e-14;8.7205e-14;4.2227e-13 |                                  |

| Function                  | Affy ID    | Locus ID               | Gene symbol     | Description                                                                      | Fold change    | p-value                          |
|---------------------------|------------|------------------------|-----------------|----------------------------------------------------------------------------------|----------------|----------------------------------|
| Metabolism                | 96608_at   | <a href="#">16922</a>  | <b>Phyh</b>     | phytanoyl-CoA hydroxylase                                                        | 0.46;0.52;0.49 | 6.3607e-10;3.5950e-08;6.1946e-09 |
| Lipid metabolism          | 92304_at   | <a href="#">18700</a>  | <b>Piga</b>     | phosphatidylinositol glycan, class A                                             | 1.55;1.42;1.26 | 7.1103e-05;0.0011263;0.0211443   |
|                           | 99513_at   | <a href="#">18783</a>  | <b>Pla2g4a</b>  | phospholipase A2, group IVA (cytosolic, calcium-dependent)                       | 2.05;1.82;1.84 | 5.7346e-12;4.8563e-10;3.7526e-10 |
|                           | 101923_at  | <a href="#">27226</a>  | <b>Pla2g7</b>   | phospholipase A2, group VII (platelet-activating factor acetylhydrolase, plasma) | 0.67;0.76;0.57 | 4.4016e-06;0.00083822;5.7615e-08 |
|                           | 100927_at  | <a href="#">18830</a>  | <b>Pltp</b>     | phospholipid transfer protein                                                    | 0.31;0.43;0.41 | 1.4999e-10;9.8542e-08;3.4556e-08 |
|                           | 100332_s_a | <a href="#">11758</a>  | <b>Prdx6</b>    | peroxiredoxin 6                                                                  | 1.77;1.98;1.96 | 3.0580e-07;3.4726e-08;4.0742e-08 |
|                           | 97114_at   | <a href="#">19156</a>  | <b>Psap</b>     | prosaposin                                                                       | 0.61;0.87;0.98 | 8.8255e-06;0.12890;0.79436       |
|                           | 94056_at   | <a href="#">20249</a>  | <b>Scd1</b>     | stearoyl-Coenzyme A desaturase 2                                                 | 0.56;0.5;0.52  | 1.5236e-08;1.5818e-09;4.6571e-09 |
|                           | 93278_at   | <a href="#">20280</a>  | <b>Scp2</b>     | sterol carrier protein 2, liver                                                  | 0.54;0.63;0.57 | 1.4507e-09;5.0729e-07;2.2794e-08 |
|                           | 95787_s_at | <a href="#">20282</a>  | <b>Scp2-ps2</b> | sterol carrier protein 2, pseudogene 2                                           | 0.59;0.75;0.71 | 8.2499e-09;9.7510e-05;1.1115e-05 |
|                           | 99566_at   | <a href="#">21991</a>  | <b>Tpi</b>      | triosephosphate isomerase                                                        | 1.38;1.5;1.2   | 4.1128e-07;1.9136e-08;0.0011107  |
| Nucleobase, nucleoside    | 99521_at   | <a href="#">11639</a>  | <b>Ak4</b>      | adenylate kinase 4                                                               | 1.57;1.54;1.3  | 4.0213e-13;2.4599e-12;3.2752e-08 |
| and nucleotide metabolism | 98071_f_at | <a href="#">13178</a>  | <b>Dck</b>      | deoxycytidine kinase                                                             | 2.21;2.15;1.97 | 5.2396e-08;1.9648e-07;1.3104e-06 |
|                           | 93290_at   | <a href="#">18950</a>  | <b>Pnp</b>      | purine-nucleoside phosphorylase                                                  | 0.62;0.75;0.76 | 6.409e-05;0.010573;0.014318      |
|                           | 98618_at   | <a href="#">21915</a>  | <b>Dtymk</b>    | deoxythymidylate kinase                                                          | 1.5;1.46;1.43  | 2.5526e-09;2.0678e-08;4.6303e-08 |
|                           | 92244_at   | <a href="#">26909</a>  | <b>Exo1</b>     | exonuclease 1                                                                    | 1.79;1.61;1.48 | 4.6102e-09;3.0530e-07;5.8018e-06 |
|                           | 103341_at  | <a href="#">51797</a>  | <b>Ctps</b>     | cytidine 5'-triphosphate synthase                                                | 1.78;1.59;1.62 | 3.7144e-12;6.3435e-10;3.3011e-10 |
|                           | 100066_at  | <a href="#">14450</a>  | <b>Gart</b>     | phosphoribosylglycinamide formyltransferase                                      | 1.56;1.43;1.28 | 2.3695e-09;2.3810e-07;4.4698e-05 |
|                           | 160107_at  | <a href="#">15452</a>  | <b>Hprt</b>     | hypoxanthine guanine phosphoribosyl transferase                                  | 1.71;1.66;1.58 | 1.0831e-07;5.1868e-07;2.3551e-06 |
|                           | 96876_at   | <a href="#">17775</a>  | <b>Laptm4a</b>  | lysosomal-associated protein transmembrane 4A                                    | 0.44;0.57;0.69 | 1.3286e-06;0.0003055;0.0098469   |
|                           | 92794_f_at | <a href="#">18102</a>  | <b>Nme1</b>     | expressed in non-metastatic cells 1, protein                                     | 1.83;1.72;1.61 | 6.2381e-05;0.00031783;0.00119703 |
|                           | 94982_f_at | <a href="#">79059</a>  | <b>Nme3</b>     | expressed in non-metastatic cells 3                                              | 0.61;0.86;0.73 | 2.878e-05;0.1324438;0.0040271    |
|                           | 100606_at  | <a href="#">19122</a>  | <b>Prnp</b>     | prion protein                                                                    | 0.7;0.6;0.74   | 5.5535e-11;1.6114e-13;3.3991e-09 |
|                           | 100612_at  | <a href="#">20133</a>  | <b>Rrm1</b>     | ribonucleotide reductase M1                                                      | 2.36;1.94;1.86 | 7.8585e-08;8.3218e-06;1.9227e-05 |
|                           | 96081_at   | <a href="#">21877</a>  | <b>Tk1</b>      | thymidine kinase 1                                                               | 2.2;2.1;2.1    | 1.2849e-07;6.7540e-07;6.6016e-07 |
|                           | 93236_s_at | <a href="#">22171</a>  | <b>Tyms</b>     | thymidylate synthase                                                             | 2.02;2.09;1.91 | 6.8530e-06;6.3986e-06;3.4332e-05 |
|                           | 94367_at   | <a href="#">80914</a>  | <b>Uck2</b>     | uridine-cytidine kinase 2                                                        | 2.14;2.03;2.19 | 4.5326e-10;3.7856e-09;5.5312e-10 |
| Other                     | 96024_at   | <a href="#">269378</a> | <b>Ahcy</b>     | S-adenosylhomocysteine hydrolase                                                 | 1.68;1.64;1.45 | 9.1027e-08;3.7241e-07;2.4090e-05 |
|                           | 100068_at  | <a href="#">11668</a>  | <b>Aldh1a1</b>  | aldehyde dehydrogenase family 1, subfamily A1                                    | 0.14;0.17;0.19 | 3.8405e-09;6.4974e-08;1.4285e-07 |



| Function               | Affy ID     | Locus ID               | Gene symbol    | Description                                              | Fold change      | p-value                          |
|------------------------|-------------|------------------------|----------------|----------------------------------------------------------|------------------|----------------------------------|
| <b>Metabolism</b>      | 94778_at    | <a href="#">26358</a>  | <b>Aldh1a7</b> | aldehyde dehydrogenase family 1, subfamily A7            | 0.52;0.55;0.58   | 2.0871e-07;1.8807e-06;6.6548e-06 |
| Other                  | 96231_at    | <a href="#">68021</a>  | <b>Bphl</b>    | biphenyl hydrolase-like                                  | 0.56;0.68;0.73   | 5.7247e-10;1.5237e-06;2.9538e-05 |
|                        | 95620_at    | <a href="#">66375</a>  | <b>Dhrs7</b>   | dehydrogenase/reductase (SDR family) member 7            | 0.5;0.85;0.76    | 3.3062e-10;0.03048014;0.00051235 |
|                        | 92553_at    | <a href="#">13885</a>  | <b>Es10</b>    | esterase 10                                              | 2.26;2.37;2.16   | 1.0652e-12;7.5547e-13;7.9855e-12 |
|                        | 101408_at   | <a href="#">14431</a>  | <b>Gamt</b>    | guanidinoacetate methyltransferase                       | 0.59;0.67;0.66   | 1.6255e-12;8.5152e-10;3.5377e-10 |
|                        | 103085_at   | <a href="#">15199</a>  | <b>Hebp1</b>   | heme binding protein 1                                   | 0.59;0.72;0.78   | 9.3636e-09;3.4334e-05;0.00074836 |
|                        | 100046_at   | <a href="#">17768</a>  | <b>Mthfd2</b>  | methylenetetrahydrofolate dehydrogenase (NAD+ dependent) | 1.99;1.48;1.45   | 6.0795e-06;0.0040112;0.0061833   |
|                        | 97385_at    | <a href="#">56174</a>  | <b>Nagk</b>    | N-acetylglucosamine kinase                               | 0.47;0.57;0.59   | 6.6752e-13;5.9608e-10;1.1918e-09 |
|                        | 101473_at   | <a href="#">18113</a>  | <b>Nnmt</b>    | nicotinamide N-methyltransferase                         | 0.63;0.65;0.66   | 1.1052e-10;1.4087e-09;2.2959e-09 |
|                        | 160084_at   | <a href="#">18263</a>  | <b>Odc</b>     | ornithine decarboxylase, structural                      | 1.86;1.66;1.54   | 1.0871e-07;4.6532e-06;4.1837e-05 |
|                        | 161433_f_at | <a href="#">18700</a>  | <b>Piga</b>    | phosphatidylinositol glycan, class A                     | 1.51;1.4;1.21    | 8.2918e-09;6.2258e-07;0.00062098 |
|                        | 104378_at   | <a href="#">18980</a>  | <b>Pon2</b>    | paraoxonase 2                                            | 2.04;1.9;1.88    | 7.3819e-11;1.3172e-09;1.6579e-09 |
|                        | 161694_f_at | <a href="#">19224</a>  | <b>Ptgs1</b>   | prostaglandin-endoperoxide synthase 1                    | 1.49;1.51;1.39   | 8.2291e-08;1.1667e-07;3.6683e-06 |
|                        | 104647_at   | <a href="#">19225</a>  | <b>Ptgs2</b>   | prostaglandin-endoperoxide synthase 2                    | 14.83;7.85;10.36 | 9.0410e-10;2.1966e-07;2.5941e-08 |
|                        | 94259_at    | <a href="#">56351</a>  | <b>Ptges3</b>  | prostaglandin E synthase 3 (cytosolic)                   | 1.52;1.38;1.14   | 5.803e-06;0.00024395;0.08143506  |
|                        | 160314_at   | <a href="#">67895</a>  | <b>Pyp</b>     | pyrophosphatase                                          | 2.1;1.81;1.69    | 2.3833e-09;2.3486e-07;1.6218e-06 |
|                        | 98459_at    | <a href="#">20425</a>  | <b>Shmt1</b>   | serine hydroxymethyl transferase 1 (soluble)             | 1.62;1.74;1.55   | 7.6218e-11;1.1221e-11;1.0069e-09 |
|                        | 96042_at    | <a href="#">20656</a>  | <b>Sod2</b>    | superoxide dismutase 2, mitochondrial                    | 1.4;1.67;1.54    | 1.9668e-06;3.1061e-09;7.5215e-08 |
|                        | 93557_at    | <a href="#">20768</a>  | <b>Sps2</b>    | selenophosphate synthetase 2                             | 1.5;1.66;1.65    | 0.00010530;1.1268e-05;1.2370e-05 |
|                        | 92540_f_at  | <a href="#">20810</a>  | <b>Srm</b>     | spermidine synthase                                      | 1.69;1.57;1.44   | 2.4916e-07;4.9671e-06;7.9820e-05 |
|                        | 99580_s_at  | <a href="#">94284</a>  | <b>Ugt1a6</b>  | UDP glucuronosyltransferase 1 family, polypeptide A6A    | 0.51;0.81;0.73   | 7.3065e-07;0.0505476;0.0061588   |
|                        | 95709_at    | <a href="#">27973</a>  | <b>Vkorc1</b>  | vitamin K epoxide reductase complex, subunit 1           | 0.51;0.59;0.59   | 7.3512e-09;1.0255e-06;1.0174e-06 |
| <b>Transport</b>       | 99138_at    | <a href="#">100088</a> | <b>Chc1</b>    | chromosome condensation 1                                | 1.72;1.68;1.71   | 3.8809e-06;1.4099e-05;8.2386e-06 |
| Protein-nucleus import | 104317_at   | <a href="#">110750</a> | <b>Cse1l</b>   | chromosome segregation 1-like (S. cerevisiae)            | 1.86;1.68;1.43   | 3.8849e-07;1.1656e-05;0.00080526 |
|                        | 104297_at   | <a href="#">76582</a>  | <b>Ipo11</b>   | importin 11                                              | 1.5;1.34;1.28    | 1.0218e-08;4.3154e-06;3.4529e-05 |
|                        | 93970_at    | <a href="#">233726</a> | <b>Ipo7</b>    | importin 7                                               | 1.94;1.68;1.53   | 8.5540e-07;4.6038e-05;0.00043933 |
|                        | 92790_at    | <a href="#">16647</a>  | <b>Kpna2</b>   | karyopherin (importin) alpha 2                           | 2.84;2.48;2.22   | 8.5420e-06;8.9834e-05;0.000376   |
|                        | 93111_at    | <a href="#">16211</a>  | <b>Kpnb1</b>   | karyopherin (importin) beta 1                            | 1.65;1.55;1.51   | 3.5047e-08;6.0160e-07;1.5648e-06 |

| Function               | Affy ID               | Locus ID               | Gene symbol                  | Description                                                               | Fold change                      | p-value                          |
|------------------------|-----------------------|------------------------|------------------------------|---------------------------------------------------------------------------|----------------------------------|----------------------------------|
| <b>Transport</b>       | 93070_at              | <a href="#">70572</a>  | <b>Kpnb3</b>                 | karyopherin (importin) beta 3                                             | 1.76;1.55;1.42                   | 1.7560e-06;9.8113e-05;0.0010786  |
| Protein-nucleus import | 98602_at              | <a href="#">19387</a>  | <b>Rangap1</b>               | RAN GTPase activating protein 1                                           | 1.86;1.58;1.87                   | 3.3836e-07;4.5458e-05;6.1552e-07 |
|                        | 94228_at              | <a href="#">103573</a> | <b>Xpo1</b>                  | exportin 1, CRM1 homolog (yeast)                                          | 1.66;1.4;1.23                    | 2.6836e-06;0.00071009;0.02209569 |
| Vesicular transport    | 101393_at             | <a href="#">11745</a>  | <b>Anxa3</b>                 | annexin A3                                                                | 1.82;1.73;1.76                   | 8.6111e-07;5.5960e-06;3.6151e-06 |
|                        | 94304_at              | <a href="#">11749</a>  | <b>Anxa6</b>                 | annexin A6                                                                | 0.51;0.48;0.5                    | 1.8302e-11;4.8420e-12;1.8809e-11 |
|                        | 100584_at             | <a href="#">11746</a>  | <b>Anxa4</b>                 | annexin A4                                                                | 0.57;0.69;0.66                   | 9.3793e-11;5.7582e-07;7.1154e-08 |
|                        | 160734_at             | <a href="#">11777</a>  | <b>Ap3s1</b>                 | adaptor-related protein complex 3, sigma 1 subunit                        | 0.39;0.52;0.53                   | 1.2813e-11;2.8723e-08;3.1730e-08 |
|                        | 160280_at             | <a href="#">12389</a>  | <b>Cav</b>                   | caveolin, caveolae protein                                                | 0.59;0.52;0.5                    | 2.6903e-07;1.3423e-08;7.2626e-09 |
|                        | 100579_s_a            | <a href="#">12757</a>  | <b>Cita</b>                  | clathrin, light polypeptide (Lca)                                         | 0.62;0.77;0.76                   | 2.7534e-06;0.0042745;0.0026236   |
|                        | 104143_at             | <a href="#">56358</a>  | <b>Copz2</b>                 | coatamer protein complex, subunit zeta 2                                  | 0.4;0.43;0.44                    | < 2.22e-16;< 2.22e-16;3.854e-16  |
|                        | 103030_at             | <a href="#">13429</a>  | <b>Dnm</b>                   | dynamamin 1                                                               | 0.61;0.83;0.81                   | 4.8988e-05;0.079789;0.049787     |
|                        | 99187_f_at            | <a href="#">67023</a>  | <b>Ed2</b>                   | mouse embryonic development factor 2                                      | 0.57;0.69;0.66                   | 8.7108e-08;8.2149e-05;1.2597e-05 |
|                        | 160812_at             | <a href="#">74105</a>  | <b>Gga2</b>                  | golgi associated, gamma adaptin ear containing, ARF binding protein 2     | 0.66;0.71;0.77                   | 8.8614e-08;3.1528e-06;0.00013274 |
|                        | 97409_at              | <a href="#">15944</a>  | <b>Ifi1</b>                  | interferon inducible protein 1                                            | 1.58;1.42;1.59                   | 1.0240e-06;7.3933e-05;1.4894e-06 |
|                        | 104464_s_a            | <a href="#">105785</a> | <b>Kdelr3</b>                | KDEL (Lys-Asp-Glu-Leu) endoplasmic reticulum protein retention receptor 3 | 0.71;0.65;0.61                   | 0.00021878;1.8299e-05;2.5934e-06 |
|                        | 101590_at             | <a href="#">16784</a>  | <b>Lamp2</b>                 | lysosomal membrane glycoprotein 2                                         | 0.52;0.67;0.65                   | 3.0926e-08;8.4442e-05;2.8554e-05 |
|                        | 161086_at             | <a href="#">22343</a>  | <b>Lin7c</b>                 | lin 7 homolog c (C. elegans)                                              | 1.5;1.44;1.49                    | 0.00057984;0.00229227;0.00103356 |
|                        | 104264_at             | <a href="#">80877</a>  | <b>Lrba</b>                  | LPS-responsive beige-like anchor                                          | 0.71;0.66;0.78                   | 1.5814e-07;1.5253e-08;3.5195e-05 |
|                        | 92854_at              | <a href="#">53869</a>  | <b>Rab11a</b>                | RAB11a, member RAS oncogene family                                        | 0.61;0.79;0.76                   | 1.3452e-06;0.0077403;0.0017326   |
|                        | 93347_at              | <a href="#">19336</a>  | <b>Rab24</b>                 | RAB24, member RAS oncogene family                                         | 0.66;0.85;0.89                   | 6.6551e-05;0.070623;0.195845     |
|                        | 97415_at              | <a href="#">19340</a>  | <b>Rab3d</b>                 | RAB3D, member RAS oncogene family                                         | 0.59;0.67;0.67                   | 6.1466e-10;1.4280e-07;1.4909e-07 |
|                        | 98731_at              | <a href="#">19344</a>  | <b>Rab5b</b>                 | RAB5B, member RAS oncogene family                                         | 0.61;0.75;0.84                   | 0.00015922;0.01815095;0.13976382 |
|                        | 95516_at              | <a href="#">56382</a>  | <b>Rab9</b>                  | RAB9, member RAS oncogene family                                          | 0.47;0.61;0.61                   | 1.5935e-07;9.5515e-05;0.00010924 |
|                        | 94269_at              | <a href="#">14470</a>  | <b>Rabac1</b>                | Rab acceptor 1 (prenylated)                                               | 0.6;0.72;0.75                    | 1.9571e-07;0.00017296;0.00062891 |
|                        | 160827_at             | <a href="#">74030</a>  | <b>Rin2</b>                  | Ras and Rab interactor 2                                                  | 0.48;0.57;0.65                   | 1.1791e-08;2.0123e-06;5.5604e-05 |
|                        | 93440_at              | <a href="#">75365</a>  | <b>Sec2211</b>               | SEC22 vesicle trafficking protein-like 1 (S. cerevisiae)                  | 0.7;0.68;0.63                    | 7.5880e-08;7.6684e-08;2.9367e-09 |
| 104709_at              | <a href="#">20334</a> | <b>Sec23a</b>          | SEC23A (S. cerevisiae)       | 0.58;0.54;0.49                                                            | 5.2045e-10;1.2221e-10;1.0683e-11 |                                  |
| 103381_at              | <a href="#">69162</a> | <b>Sec3111</b>         | SEC31-like 1 (S. cerevisiae) | 0.63;0.66;0.63                                                            | 2.4233e-11;4.1282e-10;8.9115e-11 |                                  |
| 160792_at              | <a href="#">20615</a> | <b>Snap25bp</b>        | SNAP-associated protein      | 0.66;0.84;0.85                                                            | 2.0107e-07;0.0072867;0.0120099   |                                  |

| Function            | Affy ID    | Locus ID               | Gene symbol    | Description                                                   | Fold change    | p-value                          |
|---------------------|------------|------------------------|----------------|---------------------------------------------------------------|----------------|----------------------------------|
| Vesicular transport | 103781_at  | <a href="#">20909</a>  | <b>Stx4a</b>   | syntaxin 4A (placental)                                       | 0.66;0.78;0.77 | 4.9793e-05;0.0094163;0.0056483   |
|                     | 96076_at   | <a href="#">56389</a>  | <b>Stx5a</b>   | syntaxin 5A                                                   | 0.64;0.73;0.72 | 1.0024e-12;2.3167e-09;1.1292e-09 |
|                     | 96708_at   | <a href="#">66111</a>  | <b>Tmed3</b>   | transmembrane emp24 domain containing 3                       | 0.56;0.62;0.62 | 5.4486e-10;4.6471e-08;4.0062e-08 |
|                     | 161006_at  | <a href="#">68581</a>  | <b>Tmed10</b>  | transmembrane emp24-like trafficking protein 10 (yeast)       | 1.54;1.38;1.59 | 4.0592e-10;1.5763e-07;2.5754e-10 |
|                     | 103578_at  | <a href="#">21968</a>  | <b>Tom1</b>    | target of myb1 homolog (chicken)                              | 0.64;0.70;0.82 | 3.3790e-07;1.5047e-05;0.0054067  |
|                     | 96847_at   | <a href="#">66914</a>  | <b>Vps28</b>   | vacuolar protein sorting 28 (yeast)                           | 0.64;0.81;0.76 | 1.1953e-08;0.00051976;3.0449e-05 |
|                     | 96667_at   | <a href="#">218035</a> | <b>Vps41</b>   | vacuolar protein sorting 41 (yeast)                           | 0.63;0.78;0.76 | 1.7444e-07;0.00089835;0.00028699 |
| Other               | 103069_at  | <a href="#">72568</a>  | <b>Lin9</b>    | lin-9 homolog                                                 | 1.79;1.71;1.49 | 5.2505e-08;4.0042e-07;3.0563e-05 |
|                     | 103443_at  | <a href="#">11630</a>  | <b>Aim1</b>    | absent in melanoma 1                                          | 0.63;0.59;0.61 | 3.4292e-09;5.2005e-10;1.7852e-09 |
|                     | 160713_at  | <a href="#">100494</a> | <b>Airap</b>   | arsenite inducible RNA associated protein                     | 1.23;1.43;1.59 | 0.0008981;2.2364e-06;3.3864e-08  |
|                     | 161359_s_a | <a href="#">246703</a> | <b>Apoa1bp</b> | apolipoprotein A-I binding protein                            | 0.58;0.74;0.68 | 3.2921e-10;1.0206e-05;2.7939e-07 |
|                     | 95058_f_at | <a href="#">70456</a>  | <b>Brp44</b>   | brain protein 44                                              | 0.59;0.78;0.63 | 0.00018651;0.05033056;0.00107928 |
|                     | 92525_i_at | <a href="#">68136</a>  | <b>Btbd14a</b> | BTB (POZ) domain containing 14A                               | 0.66;0.71;0.71 | 3.1524e-13;4.0166e-11;3.1143e-11 |
|                     | 160585_at  | <a href="#">67239</a>  | <b>Bxdc1</b>   | brix domain containing 1                                      | 1.62;1.59;1.2  | 8.5558e-05;0.00021759;0.09343778 |
|                     | 96775_at   | <a href="#">12412</a>  | <b>Cbx1</b>    | chromobox homolog 1 (Drosophila HP1 beta)                     | 1.69;1.22;1.06 | 6.3586e-07;0.022970;0.463789     |
|                     | 96902_at   | <a href="#">67282</a>  | <b>Ccdc53</b>  | coiled-coil domain containing 53                              | 0.65;0.78;0.73 | 8.6874e-07;0.00162150;0.00014691 |
|                     | 160298_at  | <a href="#">67896</a>  | <b>Ccdc80</b>  | coiled-coil domain containing 80                              | 0.71;0.57;0.57 | 0.0024131;1.6880e-05;1.7109e-05  |
|                     | 96200_at   | <a href="#">71963</a>  | <b>Cdca4</b>   | cell division cycle associated 4                              | 1.53;1.49;1.4  | 8.6838e-08;5.3126e-07;5.2361e-06 |
|                     | 97295_at   | <a href="#">52276</a>  | <b>Cdca8</b>   | cell division cycle associated 8                              | 2.44;2.22;2.19 | 6.3002e-06;5.0125e-05;5.9483e-05 |
|                     | 93094_at   | <a href="#">12585</a>  | <b>Cdr2</b>    | cerebellar degeneration-related 2                             | 1.72;1.63;1.45 | 2.8491e-07;2.7426e-06;9.8114e-05 |
|                     | 102215_at  | <a href="#">12589</a>  | <b>Cdv1</b>    | carnitine deficiency-associated gene expressed in ventricle 1 | 0.58;0.67;0.62 | 1.4087e-12;1.6438e-09;5.5064e-11 |
|                     | 97841_at   | <a href="#">68953</a>  | <b>Chmp2a</b>  | chromatin modifying protein 2A                                | 0.63;0.75;0.71 | 2.6349e-08;6.5959e-05;6.1113e-06 |
|                     | 97928_at   | <a href="#">52809</a>  | <b>Cln6</b>    | ceroid-lipofuscinosis, neuronal 6                             | 0.62;0.70;0.72 | 7.6415e-11;4.3117e-08;1.6143e-07 |
|                     | 93550_at   | <a href="#">13008</a>  | <b>Csrp2</b>   | cysteine and glycine-rich protein 2                           | 0.62;0.79;0.59 | 2.7440e-05;0.021156;1.2186e-05   |
|                     | 95161_at   | <a href="#">52468</a>  | <b>Ctdsp2</b>  | nuclear LIM interactor-interacting factor 2                   | 0.6;0.66;0.63  | 7.6816e-10;4.6378e-08;1.0400e-08 |
|                     | 96912_s_at | <a href="#">13024</a>  | <b>Ctla2a</b>  | cytotoxic T lymphocyte-associated protein 2 alpha             | 0.11;0.2;0.24  | 2.0027e-08;5.6687e-06;3.3753e-05 |
|                     | 103518_at  | <a href="#">13025</a>  | <b>Ctla2b</b>  | cytotoxic T lymphocyte-associated protein 2 beta              | 0.55;0.78;0.83 | 7.6956e-05;0.071214;0.161957     |
|                     | 103467_g_a | <a href="#">54151</a>  | <b>Cyhr1</b>   | cysteine and histidine rich 1                                 | 1.58;1.56;1.37 | 5.3907e-10;1.9906e-09;7.9378e-07 |
|                     | 103442_at  | <a href="#">216820</a> | <b>Dhrs7b</b>  | dehydrogenase/reductase (SDR family) member 7B                | 1.54;1.51;1.49 | 1.2681e-06;4.8195e-06;8.6044e-06 |

| Function | Affy ID     | Locus ID               | Gene symbol    | Description                                                             | Fold change    | p-value                          |
|----------|-------------|------------------------|----------------|-------------------------------------------------------------------------|----------------|----------------------------------|
| Other    | 98489_at    | <a href="#">218977</a> | <b>Dlg7</b>    | discs, large homolog 7 (Drosophila)                                     | 1.64;1.55;1.53 | 3.4242e-06;3.2581e-05;3.9933e-05 |
|          | 101975_at   | <a href="#">13386</a>  | <b>Dlk1</b>    | delta-like 1 homolog (Drosophila)                                       | 0.28;0.28;0.28 | < 2.22e-16;< 2.22e-16;< 2.22e-16 |
|          | 101503_at   | <a href="#">22240</a>  | <b>Dpysl3</b>  | UDP-glucose ceramide glucosyltransferase                                | 1.67;1.83;1.58 | 1.0614e-07;1.3134e-08;1.4247e-06 |
|          | 97498_at    | <a href="#">14199</a>  | <b>Fhl1</b>    | four and a half LIM domains 1                                           | 4.35;1.73;2.65 | 7.6561e-10;0.0016759;1.6961e-06  |
|          | 160648_at   | <a href="#">60530</a>  | <b>Figl1</b>   | figetin-like 1                                                          | 2.22;2.2;2.01  | 1.6546e-06;3.5979e-06;1.9078e-05 |
|          | 97124_at    | <a href="#">14210</a>  | <b>Fin15</b>   | fibroblast growth factor inducible 15                                   | 1.64;1.54;1.26 | 0.00021061;0.00123549;0.06495189 |
|          | 104333_at   | <a href="#">110956</a> | <b>G7e</b>     | G7e protein                                                             | 1.83;1.93;1.89 | 0.00012519;7.1102e-05;0.00010945 |
|          | 101001_at   | <a href="#">68151</a>  | <b>Gpr177</b>  | G protein-coupled receptor 177<br>glutamate rich WD repeat protein GRWD | 0.59;0.63;0.63 | 1.7722e-08;2.8712e-07;3.3400e-07 |
|          | 103853_at   | <a href="#">101612</a> | <b>Grwd1</b>   |                                                                         | 1.89;1.53;1.44 | 9.0858e-09;1.1609e-05;7.3557e-05 |
|          | 160172_at   | <a href="#">17263</a>  | <b>Gtl2</b>    | GTL2, imprinted maternally expressed untranslated mRNA                  | 0.35;0.34;0.38 | 4.0400e-12;6.1611e-12;5.8476e-11 |
|          | 160399_r_at | <a href="#">26914</a>  | <b>H2afy</b>   | H2A histone family, member Y<br>host cell factor C1 regulator 1         | 1.53;1.35;1.16 | 0.00017813;0.00568215;0.14078386 |
|          | 94266_at    | <a href="#">353502</a> | <b>Hcfc1r1</b> |                                                                         | 0.52;0.65;0.66 | 4.0714e-10;1.1295e-06;2.1329e-06 |
|          | 93228_at    | <a href="#">15201</a>  | <b>Hells</b>   | helicase, lymphoid specific                                             | 2.94;2.76;2.4  | 5.9207e-07;2.8693e-06;2.1832e-05 |
|          | 101094_at   | <a href="#">56295</a>  | <b>Higd1a</b>  | HIG1 domain family, member 1A                                           | 1.41;1.5;1.34  | 4.4786e-05;8.4571e-06;0.00042613 |
|          | 103639_at   | <a href="#">15958</a>  | <b>Ifit2</b>   | interferon-induced protein with tetratricopeptide repeats 2             | 1.2;1.66;1.44  | 0.0081353;6.9621e-08;9.6119e-06  |
|          | 104760_at   | <a href="#">15983</a>  | <b>lfrd2</b>   | interferon-related developmental regulator 2                            | 2;1.87;1.74    | 4.8086e-09;6.0575e-08;4.8167e-07 |
|          | 104640_f_at | <a href="#">75316</a>  | <b>Josd3</b>   | osephin domain containing 3                                             | 1.54;1.34;1.27 | 1.0269e-05;0.0012067;0.0061611   |
|          | 160341_at   | <a href="#">231872</a> | <b>Jtv1</b>    | JTV1 gene                                                               | 1.83;1.73;1.5  | 2.7727e-08;3.2698e-07;2.4050e-05 |
|          | 100136_at   | <a href="#">16784</a>  | <b>Lamp2</b>   | lysosomal membrane glycoprotein 2                                       | 0.6;0.84;0.81  | 2.2139e-06;0.060032;0.022221     |
|          | 93451_at    | <a href="#">223152</a> | <b>Lmo7</b>    | LIM domain only 7                                                       | 0.18;0.17;0.21 | 1.4515e-11;2.8900e-11;2.9129e-10 |
|          | 94486_at    | <a href="#">98238</a>  | <b>Lrrc59</b>  | leucine rich repeat containing 59                                       | 1.74;1.37;1.39 | 3.2822e-11;1.6674e-06;8.8940e-07 |
|          | 94289_r_at  | <a href="#">80884</a>  | <b>Maged2</b>  | melanoma antigen, family D, 2                                           | 0.51;0.53;0.58 | 2.0702e-11;1.5564e-10;3.5580e-09 |
|          | 97252_at    | <a href="#">69902</a>  | <b>Mg684</b>   | muscle protein684                                                       | 1.51;1.45;1.38 | 8.1290e-10;1.3243e-08;1.2013e-07 |
|          | 94499_at    | <a href="#">76055</a>  | <b>Mgea5</b>   | meningioma expressed antigen 5 (hyaluronidase)                          | 0.68;0.73;0.65 | 1.1582e-05;0.00023586;5.9886e-06 |
|          | 101108_at   | <a href="#">50927</a>  | <b>Nasp</b>    | nuclear autoantigenic sperm protein (histone-binding)                   | 2.12;2.04;1.76 | 1.7211e-06;6.8860e-06;0.00013196 |
|          | 93025_at    | <a href="#">65113</a>  | <b>Ndfip1</b>  | Nedd4 family interacting protein 1                                      | 0.65;0.8;0.72  | 2.9385e-06;0.00548469;0.00017405 |
|          | 98554_at    | <a href="#">29812</a>  | <b>Ndr3</b>    | N-myc downstream regulated 3                                            | 0.65;0.71;0.66 | 5.8499e-08;5.6164e-06;2.7425e-07 |
|          | 160344_at   | <a href="#">67963</a>  | <b>Npc2</b>    | Niemann Pick type C2                                                    | 0.52;0.7;0.76  | 9.3323e-08;0.00066816;0.00615136 |
|          | 94450_at    | <a href="#">28114</a>  | <b>Nsun2</b>   | NOL1/NOP2/Sun domain family 2                                           | 1.69;1.53;1.62 | 6.8667e-07;2.5410e-05;5.1147e-06 |

| Function   | Affy ID                | Locus ID               | Gene symbol                                                   | Description                                         | Fold change                      | p-value                          |
|------------|------------------------|------------------------|---------------------------------------------------------------|-----------------------------------------------------|----------------------------------|----------------------------------|
| Other      | 94528_at               | <a href="#">26425</a>  | <b>Nubp1</b>                                                  | nucleotide binding protein 1                        | 1.5;1.56;1.48                    | 5.3617e-08;2.6568e-08;1.8922e-07 |
|            | 102197_at              | <a href="#">53322</a>  | <b>Nucb2</b>                                                  | nucleobindin 2                                      | 0.66;0.72;0.7                    | 0.00059925;0.00571144;0.00372258 |
|            | 160395_at              | <a href="#">52653</a>  | <b>Nudcd2</b>                                                 | NudC domain containing 2                            | 1.57;1.4;1.25                    | 0.00050847;0.00860807;0.06556086 |
|            | 102907_at              | <a href="#">208177</a> | <b>Phldb2</b>                                                 | pleckstrin homology-like domain, family B, member 2 | 1.67;1.45;1.68                   | 3.8683e-06;0.00032602;6.1010e-06 |
|            | 98552_at               | <a href="#">67037</a>  | <b>Pmf1</b>                                                   | polyamine-modulated factor 1                        | 1.29;1.5;1.36                    | 0.00118806;1.2479e-05;0.00028937 |
|            | 99366_at               | <a href="#">217430</a> | <b>Pqlc3</b>                                                  | PQ loop repeat containing                           | 1.38;1.69;1.57                   | 5.7074e-07;1.8621e-10;3.0783e-09 |
|            | 160204_at              | <a href="#">73139</a>  | <b>Prr6</b>                                                   | proline-rich polypeptide 6                          | 1.34;1.99;1.48                   | 3.8013e-05;4.4722e-11;9.2106e-07 |
|            | 99599_s_at             | <a href="#">84113</a>  | <b>Ptov1</b>                                                  | prostate tumor over expressed gene 1                | 0.5;0.58;0.62                    | 7.3414e-12;1.9817e-09;1.7298e-08 |
|            | 160896_at              | <a href="#">19672</a>  | <b>Rcn</b>                                                    | reticulocalbin                                      | 0.71;0.67;0.61                   | 6.7060e-05;1.3075e-05;7.5255e-07 |
| 100959_at  | <a href="#">20196</a>  | <b>S100a13</b>         | S100 calcium binding protein A13                              | 0.48;0.64;0.57                                      | 9.7918e-13;2.4815e-08;6.0393e-10 |                                  |
| 160708_at  | <a href="#">30953</a>  | <b>Schip1</b>          | schwannomin interacting protein 1                             | 2.13;1.72;1.82                                      | 6.7921e-14;1.3554e-10;1.9779e-11 |                                  |
| 96345_at   | <a href="#">66366</a>  | <b>Sdbcag84</b>        | serologically defined breast cancer antigen 84                | 0.64;0.76;0.76                                      | 2.6224e-10;1.9548e-06;3.6514e-06 |                                  |
| 95731_at   | <a href="#">140742</a> | <b>Sesn1</b>           | sestrin 1                                                     | 0.42;0.52;0.44                                      | 2.4738e-12;1.2952e-09;1.8490e-11 |                                  |
| 102942_at  | <a href="#">76364</a>  | <b>Specc1</b>          | spectrin domain with coiled-coils 1                           | 3.1;2.92;2.74                                       | 3.6079e-16;2.8168e-15;1.0990e-14 |                                  |
| 97238_at   | <a href="#">21335</a>  | <b>Tacc3</b>           | transforming, acidic coiled-coil containing protein 3         | 2.35;2.24;1.96                                      | 0.00014899;0.00044494;0.00236115 |                                  |
| 103385_at  | <a href="#">56306</a>  | <b>Tera</b>            | teratocarcinoma expressed, serine rich                        | 2.24;2.16;1.95                                      | 1.2099e-12;7.5083e-12;1.1977e-10 |                                  |
| 101551_s_a | <a href="#">21753</a>  | <b>Tes</b>             | testis derived transcript                                     | 1.75;1.85;1.58                                      | 6.1093e-07;2.6206e-07;1.9977e-05 |                                  |
| 102315_at  | <a href="#">21771</a>  | <b>Tex292</b>          | testis expressed gene 292                                     | 1.81;1.68;1.51                                      | 2.7070e-08;4.6730e-07;1.2809e-05 |                                  |
| 100953_at  | <a href="#">21853</a>  | <b>Timeless</b>        | timeless homolog (Drosophila)<br>timeless interacting protein | 1.54;1.6;1.5                                        | 5.5730e-06;3.1396e-06;2.6296e-05 |                                  |
| 95497_at   | <a href="#">66131</a>  | <b>Tipin</b>           |                                                               | 1.62;1.77;1.58                                      | 7.9631e-05;1.5629e-05;0.00022477 |                                  |
| 103254_at  | <a href="#">231712</a> | <b>Trafd1</b>          | TRAF type zinc finger domain containing 1                     | 0.57;0.66;0.65                                      | 5.0026e-13;5.3254e-10;3.5565e-10 |                                  |
| 99149_at   | <a href="#">66949</a>  | <b>Trim59</b>          | tripartite motif-containing 59                                | 1.58;1.47;1.34                                      | 7.7672e-05;0.00068692;0.00747874 |                                  |
| 160376_at  | <a href="#">68728</a>  | <b>Trp53inp2</b>       | tumor protein p53 inducible nuclear protein 2                 | 0.67;0.6;0.82                                       | 1.1094e-05;7.4391e-07;0.015729   |                                  |
| 160394_at  | <a href="#">217449</a> | <b>Ttc15</b>           | tetratricopeptide repeat domain 15                            | 0.61;0.72;0.6                                       | 4.2740e-06;0.00093626;5.2405e-06 |                                  |
| 160547_s_a | <a href="#">56338</a>  | <b>Txnip</b>           | thioredoxin interacting protein                               | 0.46;0.55;0.59                                      | 2.1280e-09;4.5075e-07;2.5468e-06 |                                  |
| 96625_at   | <a href="#">218973</a> | <b>Wdhd1</b>           | WD repeat and HMG-box DNA binding protein 1                   | 1.55;1.47;1.42                                      | 9.0449e-07;9.8380e-06;3.5964e-05 |                                  |
| 160776_at  | <a href="#">98193</a>  | <b>Wdr42a</b>          | WD repeat domain 42A                                          | 0.66;0.73;0.73                                      | 2.0071e-10;6.1063e-08;7.0562e-08 |                                  |
| 102385_at  | <a href="#">72515</a>  | <b>Wdr43</b>           | WD repeat domain 43                                           | 1.54;1.32;1.29                                      | 4.9160e-09;1.3010e-05;3.5266e-05 |                                  |
| 103056_at  | <a href="#">217109</a> | <b>Wdr50</b>           | WD repeat domain 50                                           | 1.56;1.51;1.43                                      | 2.0993e-08;1.4752e-07;1.2780e-06 |                                  |

| Function | Affy ID     | Locus ID               | Gene symbol                   | Description                     | Fold change    | p-value                          |
|----------|-------------|------------------------|-------------------------------|---------------------------------|----------------|----------------------------------|
| Other    | 95643_at    | <a href="#">83669</a>  | <a href="#">Wdr6</a>          | WD repeat domain 6              | 0.62;0.7;0.7   | 8.8842e-08;1.1714e-05;1.2519e-05 |
|          | 96615_at    | <a href="#">66090</a>  | <a href="#">Ypel3</a>         | yippee-like 3                   | 0.61;0.68;0.71 | 3.6167e-10;4.1866e-08;4.6006e-07 |
|          | 104361_at   | <a href="#">232337</a> | <a href="#">Zfp637</a>        | zinc finger protein 637         | 0.66;0.78;0.73 | 3.8805e-10;8.1427e-06;1.4153e-07 |
| Unknown  | 96605_at    | <a href="#">66058</a>  | <a href="#">0610011I04Rik</a> | RIKEN cDNA 0610011I04 gene      | 1.36;2.22;2.11 | 0.0067077;1.8300e-07;4.9775e-07  |
|          | 160240_at   | <a href="#">68552</a>  | <a href="#">1110003E01Rik</a> | hypothetical protein LOC68552   | 0.42;0.62;0.68 | 8.8338e-10;2.2951e-05;0.00027477 |
|          | 96756_at    | <a href="#">68493</a>  | <a href="#">1110007M04Rik</a> | RIKEN cDNA 1110007M04 gene      | 1.47;1.5;1.23  | 3.4838e-05;3.0842e-05;0.01369    |
|          | 98594_at    | <a href="#">68861</a>  | <a href="#">1190002N15Rik</a> | hypothetical protein LOC68861   | 1.26;1.21;1.68 | 0.0013544;0.0077207;6.1908e-08   |
|          | 160799_at   | <a href="#">67527</a>  | <a href="#">1300007C21Rik</a> | RIKEN cDNA 1300007C21 gene      | 1.5;1.62;0.88  | 0.0055227;0.0017607;0.3823104    |
|          | 160723_at   | <a href="#">68971</a>  | <a href="#">1500001M20Rik</a> | hypothetical protein LOC68971 e | 1.54;1.48;1.32 | 7.2226e-06;3.8683e-05;0.0015293  |
|          | 96791_at    | <a href="#">76566</a>  | <a href="#">1500005K14Rik</a> | hypothetical protein LOC76566   | 1.54;1.18;1.5  | 6.0368e-10;0.00089908;4.4695e-09 |
|          | 97874_at    | <a href="#">78330</a>  | <a href="#">1500032D16Rik</a> | RIKEN cDNA 1500032D16 gene      | 0.56;0.77;0.71 | 3.3406e-06;0.0148595;0.0019205   |
|          | 97237_at    | <a href="#">66249</a>  | <a href="#">1810003N24Rik</a> | RIKEN cDNA 1810003N24 gene      | 1.65;1.51;1.42 | 4.2204e-07;1.2580e-05;9.4197e-05 |
|          | 103565_at   | <a href="#">66276</a>  | <a href="#">1810009A15Rik</a> | RIKEN cDNA 1810009A15 gene      | 1.45;1.52;1.47 | 6.1514e-07;1.8476e-07;6.8286e-07 |
|          | 95518_at    | <a href="#">66270</a>  | <a href="#">1810015C04Rik</a> | hypothetical protein LOC66270   | 1.49;1.71;1.93 | 0.00024063;9.4492e-06;4.9653e-07 |
|          | 95406_at    | <a href="#">67704</a>  | <a href="#">1810037I17Rik</a> | hypothetical protein LOC67704   | 1.41;1.51;1.55 | 9.0957e-08;8.1322e-09;3.0217e-09 |
|          | 94453_at    | <a href="#">103742</a> | <a href="#">1810046J19Rik</a> | RIKEN cDNA 1810046J19 gene      | 0.64;0.87;0.89 | 2.3265e-06;0.067742;0.137601     |
|          | 100877_at   | <a href="#">67705</a>  | <a href="#">1810058I24Rik</a> | RIKEN cDNA 1810058I24 gene      | 0.54;0.72;0.8  | 7.2525e-07;0.0023106;0.0272589   |
|          | 94802_at    | <a href="#">76527</a>  | <a href="#">2010004A03Rik</a> | hypothetical protein LOC76527   | 0.47;0.5;0.49  | 5.8388e-13;6.1129e-12;3.5338e-12 |
|          | 160955_at   | <a href="#">66488</a>  | <a href="#">2010309E21Rik</a> | RIKEN cDNA 2010309E21 gene      | 1.56;1.34;1.23 | 1.8416e-05;0.0025455;0.0270903   |
|          | 98524_f_at  | <a href="#">73644</a>  | <a href="#">2210039B01Rik</a> | RIKEN cDNA 2210039B01 gene      | 3.34;2.57;2.15 | 1.4999e-09;2.3201e-07;5.8148e-06 |
|          | 93877_at    | <a href="#">73661</a>  | <a href="#">2210419D22Rik</a> | RIKEN cDNA 2210419D22 gene      | 0.48;0.47;0.47 | 3.9813e-11;4.1922e-11;4.2994e-11 |
|          | 103873_i_at | <a href="#">66365</a>  | <a href="#">2310015N07Rik</a> | hypothetical protein LOC66365   | 0.57;0.74;0.61 | 1.4247e-06;0.0027982;1.4201e-05  |
|          | 160218_at   | <a href="#">70186</a>  | <a href="#">2310056P07Rik</a> | RIKEN cDNA 2310056P07 gene      | 1.56;1.77;1.24 | 0.00458959;0.00073397;0.15276935 |
|          | 96212_at    | <a href="#">69662</a>  | <a href="#">2310061I04Rik</a> | hypothetical protein LOC69662   | 1.35;1.49;1.51 | 6.1916e-05;2.0568e-06;1.2635e-06 |
|          | 94366_at    | <a href="#">66566</a>  | <a href="#">2310079N02Rik</a> | hypothetical protein LOC66566   | 0.59;0.72;0.69 | 8.1101e-11;9.9229e-07;8.7400e-08 |
|          | 93986_at    | <a href="#">67872</a>  | <a href="#">2410003A14Rik</a> | RIKEN cDNA 2410003A14 gene      | 1.47;1.56;1.45 | 0.00032134;9.3042e-05;0.00064513 |
|          | 96293_at    | <a href="#">66422</a>  | <a href="#">2410015N17Rik</a> | hypothetical protein LOC66422   | 1.64;1.59;1.49 | 8.2838e-08;5.0587e-07;4.4836e-06 |
|          | 160908_r_at | <a href="#">72421</a>  | <a href="#">2510042P03Rik</a> | hypothetical protein LOC72421   | 0.48;0.6;0.59  | 2.4082e-10;4.8420e-07;2.8579e-07 |
|          | 160845_at   | <a href="#">70385</a>  | <a href="#">2600001J17Rik</a> | hypothetical protein LOC70385   | 1.9;1.74;1.69  | 2.3496e-07;4.3484e-06;8.7750e-06 |

| Function | Affy ID     | Locus ID               | Gene symbol                   | Description                    | Fold change    | p-value                          |
|----------|-------------|------------------------|-------------------------------|--------------------------------|----------------|----------------------------------|
| Unknown  | 95927_f_at  | <a href="#">70434</a>  | <a href="#">2610201A13Rik</a> | RIKEN cDNA 2610201A13 gene     | 1.62;1.23;1.25 | 0.00028243;0.09789569;0.07231341 |
|          | 102368_at   | <a href="#">108755</a> | <a href="#">2610208E05Rik</a> | hypothetical protein LOC108755 | 0.66;0.78;0.76 | 2.6321e-06;0.00187772;0.00069945 |
|          | 92282_at    | <a href="#">70470</a>  | <a href="#">2610304G08Rik</a> | RIKEN cDNA 2610304G08 gene     | 1.64;1.52;1.28 | 7.9912e-06;0.00012167;0.01114157 |
|          | 160223_at   | <a href="#">74196</a>  | <a href="#">2610511O17Rik</a> | hypothetical protein LOC74196  | 1.51;1.51;1.3  | 1.0408e-05;1.8926e-05;0.0025276  |
|          | 92268_at    | <a href="#">212772</a> | <a href="#">2700007P21Rik</a> | RIKEN cDNA 2700007P21          | 1.62;1.21;1.31 | 1.5853e-06;0.0267816;0.0025712   |
|          | 94360_at    | <a href="#">72612</a>  | <a href="#">2700029M09Rik</a> | RIKEN cDNA 2700029M09 gene     | 1.52;1.49;1.22 | 0.0001640;0.0004852;0.0496948    |
|          | 94038_at    | <a href="#">68045</a>  | <a href="#">2700060E02Rik</a> | hypothetical protein LOC68045  | 0.66;0.77;0.67 | 3.5889e-05;0.005271;8.9235e-05   |
|          | 98613_at    | <a href="#">67201</a>  | <a href="#">2700085E05Rik</a> | hypothetical protein LOC67201  | 0.62;0.73;0.64 | 6.4848e-09;1.0495e-05;3.2524e-08 |
|          | 93441_at    | <a href="#">77022</a>  | <a href="#">2700099C18Rik</a> | RIKEN cDNA 2700099C18 gene     | 2.03;1.89;1.76 | 0.00076872;0.00281390;0.00709702 |
|          | 97374_at    | <a href="#">69953</a>  | <a href="#">2810025M15Rik</a> | hypothetical protein LOC69953  | 1.58;1.57;1.51 | 7.7811e-10;1.9847e-09;1.1442e-08 |
|          | 100116_at   | <a href="#">68026</a>  | <a href="#">2810417H13Rik</a> | hypothetical protein LOC68026  | 2.35;2.46;2.05 | 0.00029256;0.00027671;0.00230106 |
|          | 160400_at   | <a href="#">69956</a>  | <a href="#">2810422B04Rik</a> | hypothetical protein LOC69956  | 1.56;1.38;1.28 | 2.2696e-07;3.8803e-05;0.00083319 |
|          | 103664_r_at | <a href="#">67236</a>  | <a href="#">2810452K22Rik</a> | RIKEN cDNA 2810452K22 gene     | 1.69;1.46;1.29 | 9.1366e-06;0.00070256;0.01469318 |
|          | 104085_at   | <a href="#">72938</a>  | <a href="#">2900042B11Rik</a> | hypothetical protein LOC72938  | 0.59;0.71;0.68 | 4.3150e-09;7.4983e-06;1.1824e-06 |
|          | 98493_at    | <a href="#">75430</a>  | <a href="#">3200002M19Rik</a> | hypothetical protein LOC75430  | 1.62;1.41;1.35 | 1.0048e-05;0.00077928;0.00301920 |
|          | 93437_f_at  | <a href="#">74038</a>  | <a href="#">4632419I22Rik</a> | RIKEN cDNA 4632419I22 gene     | 1.54;1.34;1.28 | 1.9360e-06;0.00040025;0.00193145 |
|          | 93436_i_at  | <a href="#">74038</a>  | <a href="#">4632419I22Rik</a> | RIKEN cDNA 4632419I22 gene     | 1.59;1.38;1.27 | 0.00043843;0.01207115;0.05688651 |
|          | 93478_at    | <a href="#">78121</a>  | <a href="#">4930461P20Rik</a> | RIKEN cDNA 4930461P20 gene     | 1.49;1.76;1.27 | 9.9826e-06;8.7616e-08;0.0040628  |
|          | 103343_at   | <a href="#">73847</a>  | <a href="#">5430432M24Rik</a> | hypothetical protein LOC73847  | 1.34;1.51;1.49 | 5.6235e-06;6.8084e-08;9.9389e-08 |
|          | 161005_at   | <a href="#">70561</a>  | <a href="#">5730420B22Rik</a> | hypothetical protein LOC70561  | 0.51;0.61;0.61 | 2.6392e-08;7.0553e-06;5.9657e-06 |
|          | 96634_at    | <a href="#">70564</a>  | <a href="#">5730469M10Rik</a> | hypothetical protein LOC70564  | 0.55;0.72;0.74 | 6.9912e-08;0.00047438;0.00108797 |
|          | 103364_f_at | <a href="#">66648</a>  | <a href="#">5730494M16Rik</a> | hypothetical protein LOC66648  | 1.49;1.53;1.47 | 5.8744e-07;5.0850e-07;1.9320e-06 |
|          | 100290_f_at | <a href="#">230376</a> | <a href="#">6230416J20Rik</a> | hypothetical protein LOC230376 | 3.25;2.96;2.38 | 6.6877e-08;5.1965e-07;1.3888e-05 |
|          | 94211_at    | <a href="#">109212</a> | <a href="#">6720460F02Rik</a> | hypothetical protein LOC109212 | 1.68;1.63;1.6  | 3.223e-05;0.00010236;0.00016119  |
|          | 160963_at   | <a href="#">269233</a> | <a href="#">9630050M13Rik</a> | RIKEN cDNA 9630050M13 gene     | 1.67;1.48;1.3  | 2.9641e-12;1.5237e-09;1.5089e-06 |
|          | 94995_at    | <a href="#">68252</a>  | <a href="#">A030007L17Rik</a> | hypothetical protein LOC68252  | 1.68;1.59;1.66 | 4.5462e-10;8.3531e-09;1.6716e-09 |
|          | 96545_s_at  | <a href="#">234069</a> | <a href="#">A730042J05Rik</a> | RIKEN cDNA A730042J05 gene     | 1.61;1.42;1.24 | 7.8579e-05;0.0025129;0.0523338   |
|          | 104034_at   | <a href="#">99968</a>  | <a href="#">AA408153</a>      | expressed sequence AI464131    | 0.59;0.63;0.65 | 1.4031e-10;3.5817e-09;2.0656e-08 |
|          | 103485_at   | <a href="#">105415</a> | <a href="#">AA409373</a>      | expressed sequence AA409373    | 0.53;0.59;0.59 | 4.9079e-09;3.5777e-07;3.6376e-07 |
|          | 94359_at    | <a href="#">101476</a> | <a href="#">AA960558</a>      | expressed sequence AA960558    | 1.69;1.67;1.26 | 1.3716e-07;3.3839e-07;0.0047181  |

| Function | Affy ID     | Locus ID               | Gene symbol          | Description                                                    | Fold change    | p-value                          |
|----------|-------------|------------------------|----------------------|----------------------------------------------------------------|----------------|----------------------------------|
| Unknown  | 93180_at    | <a href="#">100694</a> | <b>AI506816</b>      | expressed sequence AI506816                                    | 2.16;1.83;1.81 | 6.4314e-10;1.0960e-07;1.3255e-07 |
|          | 94784_at    | <a href="#">99678</a>  | <b>AI593484</b>      | expressed sequence AI593484                                    | 1.74;1.83;1.83 | 3.4141e-05;1.9449e-05;2.0250e-05 |
|          | 102400_at   | <a href="#">100261</a> | <b>AU014645</b>      | expressed sequence AU014645                                    | 1.57;1.42;1.35 | 4.9055e-10;8.8925e-08;1.1494e-06 |
|          | 104252_at   | <a href="#">101757</a> | <b>AU020206</b>      | expressed sequence AU020206                                    | 2.11;1.9;1.95  | 1.8460e-11;8.5841e-10;3.9756e-10 |
|          | 93235_at    | <a href="#">233315</a> | <b>BB128963</b>      | hypothetical protein LOC233315                                 | 1.79;1.44;1.34 | 9.2268e-08;0.00011666;0.00107842 |
|          | 93980_at    | <a href="#">234138</a> | <b>BC019943</b>      | hypothetical protein LOC234138                                 | 1.78;1.67;1.49 | 2.0978e-08;2.8716e-07;1.3933e-05 |
|          | 103497_at   | <a href="#">234728</a> | <b>BC025546</b>      | cDNA sequence BC025546                                         | 1.72;1.62;1.37 | 2.9582e-06;2.7209e-05;0.0025797  |
|          | 160973_at   | <a href="#">224171</a> | <b>C330027C09Rik</b> | hypothetical protein LOC224171                                 | 3.06;2.6;2.33  | 2.5505e-06;3.8820e-05;0.00016839 |
|          | 97179_at    | <a href="#">98052</a>  | <b>C76683</b>        | expressed sequence C76683                                      | 1.32;1.53;1.45 | 2.1200e-06;2.8186e-09;3.7575e-08 |
|          | 97897_at    | <a href="#">97863</a>  | <b>C78339</b>        | expressed sequence C78339                                      | 0.66;0.74;0.7  | 5.3187e-07;8.9990e-05;1.1662e-05 |
|          | 103308_at   | <a href="#">217653</a> | <b>C79407</b>        | expressed sequence C79407                                      | 1.52;1.45;1.3  | 1.1231e-06;1.2786e-05;0.00062441 |
|          | 95984_at    | <a href="#">97294</a>  | <b>C79468</b>        | expressed sequence C79468                                      | 1.45;1.57;1.39 | 6.2703e-06;7.4977e-07;6.4278e-05 |
|          | 103312_f_at | <a href="#">96988</a>  | <b>C79684</b>        | expressed sequence C79684                                      | 1.77;1.58;1.35 | 2.0940e-06;7.3269e-05;0.0043596  |
|          | 160768_at   | <a href="#">225995</a> | <b>D030056L22</b>    | hypothetical protein LOC225995                                 | 1.58;1.64;1.54 | 5.2367e-07;3.5462e-07;2.4063e-06 |
|          | 94526_at    | <a href="#">52637</a>  | <b>D10Ert214e</b>    | hypothetical protein LOC52637                                  | 1.45;1.64;1.61 | 1.9386e-06;3.7166e-08;7.2127e-08 |
|          | 93775_at    | <a href="#">52668</a>  | <b>D12Ert647e</b>    | hypothetical protein LOC52668                                  | 0.56;0.7;0.72  | 1.1653e-11;2.0401e-07;6.6623e-07 |
|          | 160310_at   | <a href="#">52874</a>  | <b>D19Bwg1357e</b>   | DNA segment, Chr 19, Brigham & Women's Genetics 1357 expressed | 1.52;1.35;1.33 | 1.0861e-12;1.8278e-09;4.5096e-09 |
|          | 104122_at   | <a href="#">223658</a> | <b>D330001F17Rik</b> | RIKEN cDNA D330001F17 gene                                     | 0.6;0.78;0.83  | 2.3597e-05;0.018206;0.075381     |
|          | 92542_at    | <a href="#">27981</a>  | <b>D4Wsu53e</b>      | hypothetical protein LOC27981                                  | 0.62;0.72;0.75 | 7.151e-06;0.0009588;0.0028379    |
|          | 98880_at    | <a href="#">28006</a>  | <b>D6Wsu116e</b>     | DNA segment, Chr 6, Wayne State University 116, expressed      | 0.64;0.84;0.87 | 1.3982e-06;0.025355;0.081033     |
|          | 95442_at    | <a href="#">235043</a> | <b>MGC18837</b>      | hypothetical protein LOC235043                                 | 0.62;0.67;0.7  | 2.5193e-09;2.0132e-07;9.2620e-07 |
|          | 161076_at   | <a href="#">231123</a> | <b>MGC36997</b>      | hypothetical protein LOC231123                                 | 1.96;1.73;1.69 | 1.2156e-06;4.1022e-05;6.6385e-05 |
|          | 100717_at   | <a href="#">57425</a>  | <b>U90926</b>        | hypothetical protein LOC57425                                  | 2.9;2.54;2.89  | 4.8603e-12;1.6068e-10;1.2310e-11 |



**Table S2.** Corroboration of Affymetrix data by RT-quantitative PCR

|                      | Affymetrix <sup>a</sup> |                      |                      | Q-PCR <sup>b</sup>   |                      |                      |
|----------------------|-------------------------|----------------------|----------------------|----------------------|----------------------|----------------------|
|                      | RhoA <sup>Q63L</sup>    | RhoB <sup>Q63L</sup> | RhoC <sup>Q63L</sup> | RhoA <sup>Q63L</sup> | RhoB <sup>Q63L</sup> | RhoC <sup>Q63L</sup> |
| <b>Upregulated</b>   |                         |                      |                      |                      |                      |                      |
| <i>birc5</i>         | 2.99                    | 2.74                 | 2.54                 | 8                    | 5.65                 | 4                    |
| <i>bnc</i>           | 3.7                     | 3.79                 | 3.26                 | 5.27                 | 2.63                 | 3.73                 |
| <i>ccl2</i>          | 19.72                   | 39.82                | 45.39                | 55.71                | 34.29                | 84.44                |
| <i>ccl7</i>          | 6.06                    | 15.92                | 15.23                | 25.99                | 12.12                | 36.75                |
| <i>cd44</i>          | 3.07                    | 2.69                 | 2.89                 | 3.2                  | 1.7                  | 5.6                  |
| <i>ctgf</i>          | 5.57                    | 1.95                 | 2.99                 | 8                    | 3                    | 8.57                 |
| <i>cxcl1</i>         | 15.85                   | 23.32                | 26.99                | 59.71                | 22.62                | 97                   |
| <i>cxcl5</i>         | 18.84                   | 42.48                | 37.19                | 90.5                 | 48.5                 | 128                  |
| <i>epha2</i>         | 1.9                     | 1.65                 | 1.71                 | 4                    | 2.46                 | 4.59                 |
| <i>efnb2</i>         | 2.54                    | 2.32                 | 1.7                  | 3.73                 | 3.24                 | 3.48                 |
| <i>ereg</i>          | 2.93                    | 2.21                 | 1.93                 | 11.31                | 3.73                 | 10.55                |
| <i>ier3</i>          | 3.13                    | 3.59                 | 4.04                 | 4.6                  | 2.3                  | 4                    |
| <i>igf2</i>          | 2.39                    | N.D.                 | 2                    | 1.74                 | N.D.                 | 5.28                 |
| <i>jun</i>           | 1.57                    | 1.61                 | 1.65                 | 2.63                 | 1.41                 | 3.24                 |
| <i>kif20a</i>        | 2.5                     | 2.07                 | 2.04                 | 4.59                 | 2.63                 | 8.57                 |
| <i>msln</i>          | 12.99                   | 12.5                 | 12.71                | 73.5                 | 55.7                 | 27.8                 |
| <i>mybl2</i>         | 1.58                    | 1.52                 | 1.43                 | 12.99                | 6.49                 | 13.92                |
| <i>myc</i>           | 2.16                    | 1.89                 | 1.86                 | 4.28                 | 2.63                 | 5.27                 |
| <i>nr4a1</i>         | 3.23                    | 2                    | 2.58                 | 45.25                | 9.8                  | 34.3                 |
| <i>plf</i>           | 3.6                     | 5.28                 | 4.24                 | 12.99                | 19.69                | 13.9                 |
| <i>plf2</i>          | 4.68                    | 12.51                | 9.72                 | 24.25                | 21.11                | 42.22                |
| <i>mrpplf3</i>       | 7.99                    | 26.72                | 19.14                | 21.11                | 18.37                | 25.99                |
| <i>ptgs1</i>         | 1.49                    | 1.51                 | 1.39                 | 2.82                 | 1.41                 | 2                    |
| <i>ptgs2</i>         | 14.83                   | 7.85                 | 10.36                | 42.22                | 13.9                 | 48.5                 |
| <i>tnc</i>           | 4.24                    | 1.35                 | 2.43                 | 1.41                 | 0.57                 | 2.29                 |
| <i>thbd</i>          | 3.84                    | 2.86                 | 3.65                 | 3.73                 | 1.86                 | 6.96                 |
| <i>plaur</i>         | 3.02                    | 2                    | 2.41                 | 4.28                 | 4.92                 | 13.92                |
| <b>Downregulated</b> |                         |                      |                      |                      |                      |                      |
| <i>atf5</i>          | 0.39                    | 0.42                 | 0.44                 | 0.53                 | 0.125                | 0.2                  |
| <i>cxcl12</i>        | 0.38                    | 0.45                 | 0.42                 | 0.08                 | 0.21                 | 0.108                |
| <i>figf</i>          | 0.18                    | 0.27                 | 0.24                 | 0.095                | 0.125                | 0.101                |
| <i>gas1</i>          | 0.3                     | 0.36                 | 0.27                 | 0.13                 | 0.1                  | 0.05                 |
| <i>gas2</i>          | 0.61                    | 0.52                 | 0.46                 | 0.93                 | 0.32                 | 0.37                 |
| <i>gas6</i>          | 0.24                    | 0.25                 | 0.27                 | 0.05                 | 0.03                 | 0.02                 |
| <i>ldb2</i>          | 0.6                     | 0.49                 | 0.52                 | 0.23                 | 0.14                 | 0.43                 |
| <i>ldb4</i>          | 0.53                    | 0.43                 | 0.41                 | 0.047                | 0.01                 | 0.02                 |
| <i>mad4</i>          | 0.46                    | 0.51                 | 0.48                 | 0.16                 | 0.1                  | 0.08                 |
| <i>ogn</i>           | 0.09                    | 0.1                  | 0.08                 | 0.027                | 0.027                | 0.038                |
| <i>osf2</i>          | 0.15                    | 0.17                 | 0.2                  | 0.13                 | 0.18                 | 0.26                 |
| <i>pdcd4</i>         | 0.3                     | 0.41                 | 0.34                 | 0.21                 | 0.2                  | 0.17                 |
| <i>pdgfr α</i>       | 0.37                    | 0.53                 | 0.4                  | 0.26                 | 0.28                 | 0.53                 |
| <i>pdgfr β</i>       | 0.3                     | 0.34                 | 0.44                 | 0.15                 | 0.14                 | 0.46                 |
| <i>serpine2</i>      | 0.15                    | 0.15                 | 0.15                 | 0.02                 | 0.01                 | 0.033                |
| <i>six1</i>          | 0.25                    | 0.22                 | 0.2                  | 0.13                 | 0.13                 | 0.08                 |
| <i>snai2</i>         | 0.52                    | 0.59                 | 0.61                 | 0.28                 | 0.17                 | 0.3                  |
| <i>sparcl1</i>       | 0.35                    | 0.37                 | 0.33                 | 0.03                 | 0.016                | 0.047                |
| <i>tcf3</i>          | 0.65                    | 0.66                 | 0.59                 | 0.26                 | 0.18                 | 0.25                 |
| <i>thbs2</i>         | 0.18                    | 0.39                 | 0.4                  | 0.1                  | 0.14                 | 0.26                 |

<sup>a</sup> Affymetrix based determination of gene expression levels in the indicated cell lines compared to NIH3T3 cells

<sup>b</sup> RT-quantitative PCR based determination of gene expression levels in the indicated cell lines compared to NIH3T3 cells. N.D., not determined

Red labeled: Not corroborated gene by RT-quantitative PCR in the indicated cell line

**Table S3.** Rho-regulated genes with reverted expression levels after ROCK inhibition<sup>a</sup>

| Function                 | Affy ID     | Locus ID               | Gene symbol      | Description                                              | RhoAi <sup>b</sup> | RhoA <sup>c</sup> | RhoB <sup>c</sup> | RhoC <sup>c</sup> | p-value    | RhoAi <sup>d</sup> |
|--------------------------|-------------|------------------------|------------------|----------------------------------------------------------|--------------------|-------------------|-------------------|-------------------|------------|--------------------|
| <b>Extracellular</b>     | 92777_at    | <a href="#">16007</a>  | <b>Cyr61</b>     | cysteine rich protein 61                                 | 0.19               | 2.95              | 1.75              | 2.68              | < 1.00E-04 |                    |
| Cell adhesion            | 94147_at    | <a href="#">18787</a>  | <b>Serpine1</b>  | serine (or cysteine) proteinase inhibitor, clade E, mem1 | 0.31               | 4.86              | 2.28              | 3.71              | < 1.00E-04 |                    |
|                          | 101993_at   | <a href="#">21923</a>  | <b>Tnc</b>       | tenascin C                                               | 0.31               | 4.24              | 1.35              | 2.43              | < 1.00E-04 |                    |
| Ligand                   | 102798_at   | <a href="#">11535</a>  | <b>Adm</b>       | adrenomedullin                                           | 0.4                | 1.84              | 1.64              | 1.81              | < 1.00E-04 |                    |
|                          | 160469_at   | <a href="#">21825</a>  | <b>Thbs1</b>     | thrombospondin 1                                         | 0.25               | 1.52              | 0.58              | 1                 | < 1.00E-04 |                    |
| <b>Growth factor</b>     | 93294_at    | <a href="#">14219</a>  | <b>Ctgf</b>      | connective tissue growth factor                          | 0.22               | 5.57              | 1.95              | 2.99              | 1.00E-04   |                    |
|                          | 98623_g_at  | <a href="#">16002</a>  | <b>Igf2</b>      | insulin-like growth factor 2                             | 0.41               | 2.39              | 1.31              | 2                 | 6.00E-04   |                    |
|                          | 100277_at   | <a href="#">16323</a>  | <b>Inhba</b>     | inhibin beta-A                                           | 0.58               | 1.96              | 1.42              | 1.47              | 0.0018     |                    |
| <b>Membrane</b>          | 104407_at   | <a href="#">11658</a>  | <b>Alcam</b>     | activated leukocyte cell adhesion molecule               | 0.5                | 2.21              | 1.63              | 1.01              | 0.0081     |                    |
|                          | 93078_at    | <a href="#">110454</a> | <b>Ly6a</b>      | lymphocyte antigen 6 complex, locus A                    | 2.5                | 0.53              | 0.85              | 1.04              | < 1.00E-04 |                    |
|                          | 103258_at   | <a href="#">17076</a>  | <b>Ly75</b>      | lymphocyte antigen 75                                    | 0.64               | 1.77              | 1.47              | 1.46              | 0.002      |                    |
|                          | 103362_at   | <a href="#">19219</a>  | <b>Ptger4</b>    | prostaglandin E receptor 4 (subtype EP4)                 | 0.54               | 1.79              | 1.38              | 1.37              | < 1.00E-04 |                    |
|                          | 160320_at   | <a href="#">20411</a>  | <b>Sorbs1</b>    | sorbin and SH3 domain containing 1                       | 0.52               | 1.82              | 1.15              | 1.34              | 0.0045     |                    |
|                          | 94928_at    | <a href="#">21938</a>  | <b>Tnfrsf11b</b> | tumor necrosis factor receptor superfamily, mem1b        | 1.57               | 0.62              | 0.57              | 0.61              | 3.00E-04   |                    |
|                          | 99057_at    | <a href="#">21838</a>  | <b>Thy1</b>      | thymus cell antigen 1, theta                             | 0.53               | 1.54              | 1.08              | 1.37              | < 1.00E-04 |                    |
| <b>Cytoskeleton</b>      | 100381_at   | <a href="#">11459</a>  | <b>Acta1</b>     | actin, alpha 1, skeletal muscle                          | 0.56               | 1.9               | 1.26              | 1.67              | 0.0049     |                    |
|                          | 93102_f_at  | <a href="#">11468</a>  | <b>Actg2</b>     | actin, gamma 2, smooth muscle, enteric                   | 0.57               | 1.68              | 1.02              | 1.26              | 0.0066     |                    |
|                          | 96343_at    | <a href="#">60595</a>  | <b>Actn4</b>     | calpain 12                                               | 0.6                | 1.76              | 1.4               | 1.34              | < 1.00E-04 |                    |
|                          | 93541_at    | <a href="#">21345</a>  | <b>Tagln</b>     | transgelin                                               | 0.17               | 2.13              | 1.12              | 1.85              | < 1.00E-04 |                    |
|                          | 96426_at    | <a href="#">19241</a>  | <b>Tmsb4x</b>    | thymosin, beta 4, X chromosome                           | 0.66               | 1.57              | 1.51              | 1.45              | 0.009      |                    |
| <b>Intracellular</b>     | 93285_at    | <a href="#">67603</a>  | <b>Dusp6</b>     | dual specificity phosphatase 6                           | 0.4                | 2.62              | 2.22              | 1.98              | < 1.00E-04 |                    |
| <b>signal transducer</b> | 93974_at    | <a href="#">74155</a>  | <b>Errfi1</b>    | ERBB receptor feedback inhibitor 1                       | 0.5                | 2.07              | 1.82              | 1.51              | < 1.00E-04 |                    |
|                          | 101934_at   | <a href="#">225020</a> | <b>Fez2</b>      | fasciculation and elongation protein zeta 2 (zygin II)   | 0.52               | 2.05              | 1.27              | 1.52              | 6.00E-04   |                    |
|                          | 160261_i_at | <a href="#">50523</a>  | <b>Lats2</b>     | large tumor suppressor 2                                 | 0.43               | 2.07              | 1.58              | 1.62              | < 1.00E-04 |                    |
|                          | 101561_at   | <a href="#">17750</a>  | <b>Mt2</b>       | metallothionein 2                                        | 2.18               | 0.48              | 0.73              | 0.83              | < 1.00E-04 |                    |
|                          | 96592_at    | <a href="#">18708</a>  | <b>Pik3r1</b>    | PI3-kinase, regulatory subunit, polypep1 (p85 $\alpha$ ) | 1.79               | 0.58              | 0.68              | 0.69              | 1.00E-04   |                    |
|                          | 101995_at   | <a href="#">18412</a>  | <b>Sqstm1</b>    | sequestosome 1                                           | 1.54               | 0.64              | 0.83              | 0.96              | 0.0083     |                    |
| <b>Proapoptotic</b>      | 93842_at    | <a href="#">223453</a> | <b>Dap</b>       | death-associated protein                                 | 1.59               | 0.65              | 0.87              | 0.84              | < 1.00E-04 |                    |

1

<sup>a</sup> Genes are classified into functional groups as in table S1. The Affymetrix identification number (Affy ID), the locus identification number (Locus ID), the symbol and the description for each gene are shown.

Upregulated genes after the Y27632 treatment are shown in red and downregulated genes in blue

<sup>b</sup> Fold change in the expression levels in RhoA<sup>Q63L</sup>-transformed cells after the Y27632 treatment

<sup>c</sup> Fold change in the expression levels in Rho-transformed cells compare to NIH3T3 (see Table S1). Values not statistically significant are shown in black

<sup>d</sup> P-values of genes affected in RhoA<sup>Q63L</sup>-transformed cells after the Y27632 treatment determined with the F-statistic. P-values lower than 1.00E-04 are shown as < 1.00E-04. The same colour code as in a is used

| Function                                                    | Affy ID     | Locus ID               | Gene symbol          | Description                                         | RhoAi <sup>c</sup> | RhoA <sup>d</sup> | RhoB <sup>d</sup> | RhoC <sup>d</sup> | p-value    | RhoAi <sup>d</sup> |
|-------------------------------------------------------------|-------------|------------------------|----------------------|-----------------------------------------------------|--------------------|-------------------|-------------------|-------------------|------------|--------------------|
| <b>Regulation of transcription</b>                          | 104712_at   | <a href="#">17869</a>  | <b>Myc</b>           | myelocytomatosis oncogene                           | 0.5                | 2.16              | 1.89              | 1.86              | 1.00E-04   |                    |
|                                                             | 93615_at    | <a href="#">18516</a>  | <b>Pbx3</b>          | pre B-cell leukemia transcription factor 3          | 0.6                | 1.59              | 1.52              | 1.24              | 0.0015     |                    |
| <b>Metabolism</b>                                           | 96085_at    | <a href="#">14860</a>  | <b>Gsta4</b>         | glutathione S-transferase, alpha 4                  | 2.13               | 0.44              | 0.72              | 0.59              | < 1.00E-04 |                    |
| Glutathion Metabolism                                       | 96258_at    | <a href="#">66447</a>  | <b>Mgst3</b>         | microsomal glutathione S-transferase 3              | 2.23               | 0.49              | 0.88              | 0.83              | < 1.00E-04 |                    |
| Nucleob., Nucleos., Nucleot.<br>and Nucleic acid Metabolism | 99959_at    | <a href="#">11639</a>  | <b>Ak4</b>           | adenylate kinase 4                                  | 0.63               | 1.57              | 1.54              | 1.3               | 0.0043     |                    |
| Other                                                       | 99580_s_at  | <a href="#">94284</a>  | <b>Ugt1a6</b>        | UDP glycosyltransferase 1 family, polypeptide A6    | 1.89               | 0.51              | 0.81              | 0.73              | 0.0021     |                    |
| <b>Transport</b>                                            | 103031_g_at | <a href="#">13429</a>  | <b>Dnm</b>           | dynamin                                             | 1.57               | 0.61              | 0.83              | 0.81              | 0.0031     |                    |
| Vesicular transport                                         | 97409_at    | <a href="#">15944</a>  | <b>Ifi1</b>          | interferon inducible protein 1                      | 0.6                | 1.58              | 1.42              | 1.59              | 5.00E-04   |                    |
| <b>Other</b>                                                | 96775_at    | <a href="#">12412</a>  | <b>Cbx1</b>          | chromobox homolog 1 (Drosophila HP1 beta)           | 0.55               | 1.69              | 1.22              | 1.06              | < 1.00E-04 |                    |
|                                                             | 97498_at    | <a href="#">14199</a>  | <b>Fhl1</b>          | four and a half LIM domains 1                       | 0.21               | 4.35              | 1.73              | 2.65              | < 1.00E-04 |                    |
|                                                             | 102907_at   | <a href="#">208177</a> | <b>Phldb2</b>        | pleckstrin homology-like domain, family B, member 2 | 0.6                | 1.67              | 1.45              | 1.68              | < 1.00E-04 |                    |
| <b>Unknown</b>                                              | 103664_r_at | <a href="#">67236</a>  | <b>2810452K22Rik</b> | RIKEN cDNA 2810452K22 gene                          | 0.64               | 1.69              | 1.46              | 1.29              | 0.0052     |                    |
|                                                             | 93436_i_at  | <a href="#">74038</a>  | <b>4632419I22Rik</b> | RIKEN cDNA 4632419I22 gene                          | 0.66               | 1.54              | 1.34              | 1.28              | 0.0045     |                    |

**Table S4.** Rho-regulated genes not reverted after the Y27632 treatment<sup>a</sup>

| Function                       | Affy ID     | Locus ID               | Gene symbol <sup>b</sup> | Description                                                   | RhoAi <sup>c</sup> | RhoA <sup>d</sup> | RhoB <sup>d</sup> | RhoC <sup>d</sup> | p-value   | RhoAi <sup>e</sup> |
|--------------------------------|-------------|------------------------|--------------------------|---------------------------------------------------------------|--------------------|-------------------|-------------------|-------------------|-----------|--------------------|
| <b>Extracellular</b>           | 161984_f_at | <a href="#">12825</a>  | <b>Col3a1*</b>           | procollagen, type III, alpha 1                                | 0.53               | 0.49              | 0.41              | 0.32              | 1.00E-04  |                    |
| Cell adhesion                  | 93866_s_at  | <a href="#">17313</a>  | <b>Mglap*</b>            | matrix gamma-carboxyglutamate (gla) protein                   | 0.45               | 0.35              | 0.2               | 0.46              | <1.00E-04 |                    |
|                                | 103721_at   | <a href="#">114249</a> | <b>Npnt</b>              | nephronectin                                                  | 0.31               | 1.84              | 0.77              | 1                 | <1.00E-04 |                    |
|                                | 92593_at    | <a href="#">50706</a>  | <b>Osf2*</b>             | osteoblast specific factor 2 (fasciclin I-like)               | 0.31               | 0.15              | 0.18              | 0.21              | 2.00E-04  |                    |
|                                | 160519_at   | <a href="#">21859</a>  | <b>Timp3</b>             | tissue inhibitor of metalloproteinase 3                       | 2                  | 0.14              | 0.22              | 0.17              | <1.00E-04 |                    |
| Ligand                         | 95348_at    | <a href="#">14825</a>  | <b>Cxcl1</b>             | chemokine (C-X-C motif) ligand 1                              | 0.52               | 15.85             | 23.32             | 26.99             | 0.002     |                    |
|                                | 93534_at    | <a href="#">13179</a>  | <b>Dcn</b>               | decorin                                                       | 2.09               | 0.19              | 0.69              | 0.43              | 0.0086    |                    |
|                                | 93929_s_at  | <a href="#">26421</a>  | <b>Mrplf3*</b>           | proliferin 3                                                  | 4                  | 7.99              | 26.72             | 19.14             | <1.00E-04 |                    |
|                                | 93883_at    | <a href="#">18812</a>  | <b>Pif2*</b>             | proliferin 2                                                  | 3.45               | 4.68              | 12.51             | 9.72              | 1.00E-04  |                    |
| <b>Growth factor</b>           | 98802_at    | <a href="#">13874</a>  | <b>Ereg</b>              | epiregulin                                                    | 0.59               | 2.93              | 2.21              | 1.93              | 6.00E-04  |                    |
|                                | 92730_at    | <a href="#">15200</a>  | <b>Hbepf</b>             | heparin-binding EGF-like growth factor                        | 0.56               | 2.27              | 1.71              | 1.56              | 3.00E-04  |                    |
| <b>Membrane/ Cell adhesion</b> | 102663_at   | <a href="#">18793</a>  | <b>Plaur</b>             | urokinase plasminogen activator receptor                      | 0.57               | 3.02              | 2                 | 2.41              | 4.00E-04  |                    |
| Channel-Transporter            | 93330_at    | <a href="#">11826</a>  | <b>Aqp1*</b>             | aquaporin 1                                                   | 5.27               | 2.31              | 3.75              | 4.03              | <1.00E-04 |                    |
| Immune response                | 93874_s_at  | <a href="#">16158</a>  | <b>Il11ra2</b>           | interleukin 11 receptor, alpha chain 2                        | 1.54               | 0.23              | 0.31              | 0.29              | 4.00E-04  |                    |
| Receptor activity              | 103980_at   | <a href="#">13836</a>  | <b>Epha2</b>             | Eph receptor A2                                               | 0.63               | 1.9               | 1.65              | 1.71              | <1.00E-04 |                    |
|                                | 95474_at    | <a href="#">14062</a>  | <b>F2r*</b>              | coagulation factor II (thrombin) receptor                     | 0.65               | 0.71              | 0.65              | 0.77              | <1.00E-04 |                    |
|                                | 95079_at    | <a href="#">18595</a>  | <b>Pdgfra</b>            | platelet derived growth factor receptor, $\alpha$ polypeptide | 1.62               | 0.37              | 0.53              | 0.4               | 0.0033    |                    |
| Signal transducer              | 102395_at   | <a href="#">18858</a>  | <b>Pmp22</b>             | peripheral myelin protein                                     | 1.73               | 0.15              | 0.22              | 0.2               | <1.00E-04 |                    |
| Other                          | 95531_at    | <a href="#">319434</a> | <b>Amot*</b>             | angiominin                                                    | 0.57               | 0.53              | 0.45              | 0.52              | 2.00E-04  |                    |
|                                | 100065_r_at | <a href="#">14609</a>  | <b>Gja1</b>              | gap junction membrane channel protein a 1                     | 0.58               | 4.68              | 3.61              | 3.12              | 8.00E-04  |                    |
|                                | 97885_at    | <a href="#">65963</a>  | <b>LR8*</b>              | LR8 protein                                                   | 2.44               | 1.31              | 1.92              | 1.93              | <1.00E-04 |                    |
|                                | 160373_i_at | <a href="#">20324</a>  | <b>Sdpr</b>              | serum deprivation response                                    | 0.48               | 3.58              | 3.05              | 3.37              | <1.00E-04 |                    |
| <b>Cytoskeleton</b>            | 95637_at    | <a href="#">286940</a> | <b>Flnb</b>              | filamin, beta                                                 | 0.63               | 1.83              | 1.47              | 1.87              | 1.00E-04  |                    |
| <b>Intracellular</b>           | 97411_at    | <a href="#">13605</a>  | <b>Ect2</b>              | ect2 oncogene                                                 | 0.66               | 3.66              | 3.5               | 2.88              | 6.00E-04  |                    |
| Signal transducer activity     | 93573_at    | <a href="#">17748</a>  | <b>Mt1</b>               | metallothionein 1                                             | 1.93               | 0.41              | 0.69              | 0.77              | 1.00E-04  |                    |
|                                | 93178_at    | <a href="#">53972</a>  | <b>Ngef*</b>             | neuronal guanine nucleotide exchange factor                   | 1.52               | 1.54              | 2.16              | 1.61              | <1.00E-04 |                    |
|                                | 104063_at   | <a href="#">71943</a>  | <b>Srcasm</b>            | Src activating and signaling molecule                         | 0.62               | 2.13              | 2.03              | 1.83              | 1.00E-04  |                    |
|                                | 102850_at   | <a href="#">51789</a>  | <b>Tnk2</b>              | tyrosine kinase, non-receptor, 2                              | 0.63               | 2.3               | 1.74              | 1.87              | <1.00E-04 |                    |

1

<sup>a</sup> Genes are classified into functional groups as in table S1. The Affymetrix identification number (Affy ID), the locus identification number (Locus ID), the symbol and the description for each gene are shown. Upregulated genes after the Y27632 treatment are shown in red and downregulated genes in blue

<sup>b</sup> Genes with the same pattern of change as in Rho-transformed cells are indicated with \*

<sup>c</sup> Fold change in the expression levels in RhoA<sup>Q63L</sup>-transformed cells after the Y27632 treatment

<sup>d</sup> Fold change in the expression levels in Rho-transformed cells compare to NIH3T3 (see Table S1). Values not statistically significant are shown in black

<sup>e</sup> P-values of genes affected in RhoA<sup>Q63L</sup>-transformed determined with the F-statistic. P-values lower than 1.00E-04 are shown as <1.00E-04

| Function                                | Affy ID                    | Locus ID               | Gene symbol <sup>b</sup> | Description                                         | RhoAi <sup>c</sup> | RhoA <sup>d</sup> | RhoB <sup>d</sup> | RhoC <sup>d</sup> | p-value   | RhoAi <sup>e</sup> |
|-----------------------------------------|----------------------------|------------------------|--------------------------|-----------------------------------------------------|--------------------|-------------------|-------------------|-------------------|-----------|--------------------|
| Signal transducer activity              | <a href="#">95022_at</a>   | <a href="#">83397</a>  | <b>Akap12*</b>           | A kinase (PRKA) anchor protein (gravin) 12          | 0.6                | 0.48              | 0.45              | 0.5               | 3.00E-04  |                    |
| <b>Proteolysis and peptidolysis</b>     | <a href="#">96065_at</a>   | <a href="#">17035</a>  | <b>Lxn</b>               | latexin                                             | 1.76               | 0.27              | 0.35              | 0.38              | 1.00E-04  |                    |
| <b>Heat Shock</b>                       | <a href="#">98111_at</a>   | <a href="#">15505</a>  | <b>Hsp105</b>            | heat shock protein 105                              | 0.66               | 2.14              | 1.9               | 1.98              | 7.00E-04  |                    |
| <b>Apoptosis</b>                        | <a href="#">160829_at</a>  | <a href="#">21664</a>  | <b>Phlda1</b>            | pleckstrin homology-like domain, family A, member 1 | 0.51               | 3.02              | 2.88              | 2.71              | <1.00E-04 |                    |
|                                         | <a href="#">94384_at</a>   | <a href="#">15937</a>  | <b>Ier3</b>              | immediate early response 3                          | 0.65               | 3.13              | 3.59              | 4.04              | 5.00E-04  |                    |
| <b>Cell cycle</b>                       | <a href="#">102292_at</a>  | <a href="#">13197</a>  | <b>Gadd45a*</b>          | growth arrest and DNA-damage-inducible 45 alpha     | 1.82               | 1.28              | 1.71              | 1.6               | <1.00E-04 |                    |
|                                         | <a href="#">99522_at</a>   | <a href="#">14841</a>  | <b>Gsg2</b>              | germ cell-specific gene 2                           | 0.67               | 1.94              | 1.69              | 1.46              | 0.0026    |                    |
| <b>DNA replic., rep. and rec.</b>       | <a href="#">101459_at</a>  | <a href="#">12648</a>  | <b>Chd1</b>              | chromodomain helicase DNA binding protein 1         | 0.67               | 1.93              | 1.64              | 1.51              | 4.00E-04  |                    |
| <b>Regulation of transcription</b>      | <a href="#">93371_at</a>   | <a href="#">12173</a>  | <b>Bnc</b>               | basonuclin                                          | 0.57               | 3.7               | 3.79              | 3.26              | <1.00E-04 |                    |
|                                         | <a href="#">102048_at</a>  | <a href="#">107765</a> | <b>Crap</b>              | cardiac responsive adriamycin protein               | 0.35               | 2.29              | 2.24              | 2.12              | <1.00E-04 |                    |
|                                         | <a href="#">101429_at</a>  | <a href="#">13198</a>  | <b>Ddit3</b>             | DNA-damage inducible transcript 3                   | 1.7                | 0.5               | 0.55              | 0.58              | <1.00E-04 |                    |
|                                         | <a href="#">92564_at</a>   | <a href="#">16978</a>  | <b>Lrrfip1</b>           | leucine rich repeat (in FLII) interacting protein 1 | 0.53               | 2.64              | 2.36              | 1.96              | 0.0012    |                    |
|                                         | <a href="#">99076_at</a>   | <a href="#">353187</a> | <b>Nr1d2*</b>            | nuclear receptor subfamily 1, group D, member 2     | 1.76               | 1.26              | 1.83              | 1.72              | <1.00E-04 |                    |
|                                         | <a href="#">103327_at</a>  | <a href="#">20204</a>  | <b>Prrx2</b>             | paired related homeobox 2                           | 2                  | 0.31              | 0.31              | 0.36              | <1.00E-04 |                    |
| <b>Metabolism/Amino acid metabolism</b> | <a href="#">96346_at</a>   | <a href="#">12583</a>  | <b>Cdo1</b>              | cysteine dioxygenase 1, cytosolic                   | 1.79               | 0.12              | 0.17              | 0.18              | 5.00E-04  |                    |
| Carbohydrate Metabolism                 | <a href="#">96803_at</a>   | <a href="#">74185</a>  | <b>Gbe1*</b>             | glucan (1,4-alpha-), branching enzyme 1             | 1.52               | 1.49              | 1.6               | 1.4               | 0.0017    |                    |
| Lipid metabolism                        | <a href="#">102370_at</a>  | <a href="#">114664</a> | <b>Dhrs8</b>             | dehydrogenase/reductase (SDR family) member 8       | 1.54               | 0.35              | 0.51              | 0.53              | 0.0095    |                    |
|                                         | <a href="#">95620_at</a>   | <a href="#">66375</a>  | <b>Dhrs7</b>             | dehydrogenase/ reductase                            | 1.82               | 0.5               | 0.85              | 0.76              | <1.00E-04 |                    |
| Other                                   | <a href="#">104647_at</a>  | <a href="#">19225</a>  | <b>Ptgs2</b>             | prostaglandin-endoperoxide synthase 2               | 0.21               | 14.83             | 7.85              | 10.36             | <1.00E-04 |                    |
| <b>RNA metabolisim</b>                  | <a href="#">92569_f_at</a> | <a href="#">55989</a>  | <b>No15</b>              | nucleolar protein 5                                 | 0.63               | 1.88              | 1.57              | 1.43              | 4.00E-04  |                    |
| <b>Vesicular transport</b>              | <a href="#">101393_at</a>  | <a href="#">11745</a>  | <b>Anxa3</b>             | annexin A3                                          | 0.62               | 1.82              | 1.73              | 1.76              | 9.00E-04  |                    |
| <b>Other</b>                            | <a href="#">100068_at</a>  | <a href="#">11668</a>  | <b>Aldh1a1</b>           | aldehyde dehydrogenase family 1, subfamily A1       | 1.89               | 0.14              | 0.17              | 0.19              | 2.00E-04  |                    |
|                                         | <a href="#">160298_at</a>  | <a href="#">67896</a>  | <b>Ccdc80*</b>           | coiled-coil domain containing 80                    | 0.66               | 0.71              | 0.57              | 0.57              | 5.00E-04  |                    |
|                                         | <a href="#">96912_s_at</a> | <a href="#">13024</a>  | <b>Ctla2a</b>            | cytotoxic T lymphocyte-associated protein 2 alpha   | 2.13               | 0.11              | 0.2               | 0.24              | <1.00E-04 |                    |
| <b>Unknown</b>                          | <a href="#">93235_at</a>   | <a href="#">233315</a> | <b>BB128963</b>          | expressed sequence BB128963                         | 0.66               | 1.79              | 1.44              | 1.34              | <1.00E-04 |                    |
|                                         | <a href="#">96605_at</a>   | <a href="#">66058</a>  | <b>0610011I04Rik*</b>    | RIKEN cDNA 0610011I04 gene                          | 2.86               | 1.36              | 2.22              | 2.11              | <1.00E-04 |                    |
|                                         | <a href="#">160799_at</a>  | <a href="#">67527</a>  | <b>1300007C21Rik</b>     | RIKEN cDNA 1300007C21 gene                          | 0.43               | 1.5               | 1.62              | 0.88              | <1.00E-04 |                    |
|                                         | <a href="#">98524_f_at</a> | <a href="#">73644</a>  | <b>2210039B01Rik</b>     | RIKEN cDNA 2210039B01 gene                          | 0.63               | 3.34              | 2.57              | 2.15              | 8.00E-04  |                    |

**Table S5.** Not Rho-regulated genes affected after the Y27632 treatment<sup>a</sup>

| Function             | Affy ID     | Locus ID               | Gene symbol    | Description                                            | RhoAi <sup>b</sup> | p-value RhoAi <sup>c</sup> |
|----------------------|-------------|------------------------|----------------|--------------------------------------------------------|--------------------|----------------------------|
| <b>Extracellular</b> | 101093_at   | <a href="#">12826</a>  | <b>Col4a1</b>  | procollagen, type IV, alpha 1                          | 0.54               | 4.00E-04                   |
| Cell adhesion        | 101039_at   | <a href="#">12827</a>  | <b>Col4a2</b>  | procollagen, type IV, alpha 2                          | 0.67               | <1.00E-04                  |
|                      | 92567_at    | <a href="#">12832</a>  | <b>Col5a2</b>  | procollagen, type V, alpha 2                           | 0.38               | <1.00E-04                  |
|                      | 161346_f_at | <a href="#">259277</a> | <b>Klk8</b>    | kallikrein 8                                           | 1.67               | 6.00E-04                   |
|                      | 97160_at    | <a href="#">20692</a>  | <b>Sparc</b>   | secreted acidic cysteine rich glycoprotein             | 0.62               | 2.00E-04                   |
| Ion transport        | 92851_at    | <a href="#">12870</a>  | <b>Cp</b>      | ceruloplasmin                                          | 1.93               | 0.0073                     |
| Ligand               | 96055_at    | <a href="#">12424</a>  | <b>Cck</b>     | cholecystokinin                                        | 2.86               | <1.00E-04                  |
|                      | 161639_f_at | <a href="#">14459</a>  | <b>Gast</b>    | gastrin                                                | 1.67               | 3.00E-04                   |
| <b>Growth factor</b> | 101450_at   | <a href="#">12977</a>  | <b>Csf1</b>    | colony stimulating factor 1 (macrophage)               | 0.48               | <1.00E-04                  |
| <b>Membrane</b>      | 104363_at   | <a href="#">106647</a> | <b>Cdsn</b>    | corneodesmosin                                         | 1.76               | <1.00E-04                  |
| Cell adhesion        | 100906_at   | <a href="#">16421</a>  | <b>Itgb7</b>   | integrin beta 7                                        | 1.59               | 0.0064                     |
|                      | 92558_at    | <a href="#">22329</a>  | <b>Vcam1</b>   | vascular cell adhesion molecule 1                      | 0.57               | <1.00E-04                  |
| Channel-transporter  | 100379_f_at | <a href="#">11832</a>  | <b>Aqp7</b>    | aquaporin 7                                            | 0.64               | <1.00E-04                  |
| Immune reponse       | 98472_at    | <a href="#">15040</a>  | <b>H2-T23</b>  | histocompatibility 2, T region locus 23                | 1.76               | 1.00E-04                   |
|                      | 160358_at   | <a href="#">12490</a>  | <b>Cd34</b>    | CD34 antigen                                           | 1.57               | <1.00E-04                  |
| Receptor activity    | 103923_at   | <a href="#">83924</a>  | <b>Gpr137b</b> | G protein-coupled receptor 137B                        | 1.54               | 0.0016                     |
|                      | 93042_at    | <a href="#">12257</a>  | <b>Bzrp</b>    | benzodiazepine receptor, peripheral                    | 1.59               | <1.00E-04                  |
|                      | 97689_at    | <a href="#">14066</a>  | <b>F3</b>      | coagulation factor III                                 | 0.53               | <1.00E-04                  |
|                      | 102224_at   | <a href="#">16001</a>  | <b>Igf1r</b>   | insulin-like growth factor I receptor                  | 0.66               | 1.00E-04                   |
|                      | 95016_at    | <a href="#">18186</a>  | <b>Nrp</b>     | neuropilin                                             | 0.43               | 2.00E-04                   |
|                      | 97769_at    | <a href="#">19220</a>  | <b>Ptgrf</b>   | prostaglandin F receptor                               | 1.86               | 1.00E-04                   |
| <b>Cytoskeleton</b>  | 93100_at    | <a href="#">11475</a>  | <b>Acat2</b>   | actin, alpha 2, smooth muscle, aorta                   | 0.15               | <1.00E-04                  |
|                      | 101029_f_at | <a href="#">11464</a>  | <b>Actc1</b>   | actin, alpha, cardiac                                  | 0.57               | 2.00E-04                   |
|                      | 94536_s_at  | <a href="#">67268</a>  | <b>MLC-B</b>   | myosin light chain, regulatory B like                  | 0.65               | <1.00E-04                  |
|                      | 102108_f_at | <a href="#">17886</a>  | <b>Myh9</b>    | myosin heavy chain IX                                  | 0.58               | <1.00E-04                  |
|                      | 160367_at   | <a href="#">67399</a>  | <b>Pdlim7</b>  | PDZ and LIM domain 7                                   | 0.62               | 8.00E-04                   |
|                      | 96774_at    | <a href="#">218952</a> | <b>Plekhc1</b> | pleckstrin homology domain containing, family C memb.1 | 0.49               | <1.00E-04                  |
|                      | 160532_at   | <a href="#">22003</a>  | <b>Tpm1</b>    | tropomyosin 1, alpha                                   | 0.59               | <1.00E-04                  |
|                      | 94963_at    | <a href="#">22330</a>  | <b>Vcl</b>     | vinculin                                               | 0.52               | <1.00E-04                  |

1

<sup>a</sup> Genes are classified into functional groups as in table S1. The Affymetrix identification number (Affy ID), the locus identification number (Locus ID), the symbol and the description for each gene are shown. Upregulated genes after the Y27632 treatment are shown in red and downregulated genes in blue

<sup>b</sup> Fold change in the expression levels in RhoA<sup>Q63L</sup>-transformed cells after the Y27632 treatment

<sup>c</sup> P-values of genes affected in RhoA<sup>Q63L</sup>-transformed determined with the F-statistic. P-values lower than 1.00E-04 are shown as <1.00E-04

| Function                                | Affy ID     | Locus ID               | Gene symbol   | Description                                                     | RhoAi <sup>b</sup> | p-value RhoAi <sup>c</sup> |
|-----------------------------------------|-------------|------------------------|---------------|-----------------------------------------------------------------|--------------------|----------------------------|
| <b>Intracellular</b>                    | 97529_at    | <a href="#">11752</a>  | <b>Anxa8</b>  | annexin A8                                                      | 2                  | <1.00E-04                  |
| Signal Transducer                       | 104432_at   | <a href="#">11858</a>  | <b>Arhn</b>   | ras homolog N (RhoN)                                            | 1.52               |                            |
|                                         | 96736_at    | <a href="#">106140</a> | <b>Lpp</b>    | LIM domain containing preferred translocation partner in lipoma | 0.66               | 7.00E-04                   |
|                                         | 160746_at   | <a href="#">19877</a>  | <b>Rock1</b>  | Rho-associated coiled-coil forming kinase 1                     | 0.65               | 0.0013                     |
|                                         | 98946_at    | <a href="#">78889</a>  | <b>Wsb1</b>   | WD-40-repeat-containing protein with a SOCS box 1               | 0.67               | 1.00E-04                   |
|                                         | 160296_at   | <a href="#">59043</a>  | <b>Wsb2</b>   | WD-40-repeat-containing protein with a SOCS box 2               | 0.63               | 1.00E-04                   |
| <b>Proteolysis and<br/>peptidolysis</b> | 101587_at   | <a href="#">13849</a>  | <b>Ephx1</b>  | epoxide hydrolase 1, microsomal                                 | 1.52               | <1.00E-04                  |
|                                         | 94238_at    | <a href="#">76453</a>  | <b>Prss23</b> | protease, serine, 23                                            | 0.47               | 0.0027                     |
| <b>Heat shock</b>                       | 101955_at   | <a href="#">14828</a>  | <b>Hspa5</b>  | heat shock 70kD protein 5 (glucose-regulated protein)           | 0.65               | <1.00E-04                  |
| <b>Apoptosis</b>                        | 98945_at    | <a href="#">54673</a>  | <b>Bif-1</b>  | SH3-domain GRB2-like B1 (endophilin)                            | 0.66               | 1.00E-04                   |
|                                         | 93439_f_at  | <a href="#">114774</a> | <b>Pawr</b>   | PRKC, apoptosis, WT1, regulator                                 | 0.59               | <1.00E-04                  |
| <b>Regulation of<br/>transcription</b>  | 104155_f_at | <a href="#">11910</a>  | <b>Atf3</b>   | activating transcription factor 3                               | 1.52               | <1.00E-04                  |
|                                         | 102916_s_at | <a href="#">12915</a>  | <b>Crebl1</b> | cAMP responsive element binding protein-like 1                  | 1.54               | 5.00E-04                   |
|                                         | 98579_at    | <a href="#">13653</a>  | <b>Egr1</b>   | early growth response 1                                         | 0.25               | <1.00E-04                  |
|                                         | 104561_at   | <a href="#">70239</a>  | <b>Gtf3c5</b> | general transcription factor IIIC, polypeptide 5                | 1.5                | <1.00E-04                  |
|                                         | 97937_at    | <a href="#">12224</a>  | <b>Klf5</b>   | Kruppel-like factor 5                                           | 0.63               | 0.0069                     |
|                                         | 98083_at    | <a href="#">81841</a>  | <b>Klf6</b>   | Kruppel-like factor 6                                           | 0.63               | <1.00E-04                  |
|                                         | 103052_r_at | <a href="#">11819</a>  | <b>Nr2f2</b>  | nuclear receptor subfamily 2, group F, member 2                 | 0.59               | <1.00E-04                  |
|                                         | 104070_at   | <a href="#">18519</a>  | <b>Pcaf</b>   | p300/CBP-associated factor                                      | 0.66               | 2.00E-04                   |
|                                         | 99021_at    | <a href="#">18933</a>  | <b>Prrx1</b>  | paired related homeobox 1                                       | 1.67               | 0.0037                     |
|                                         | 161067_at   | <a href="#">228775</a> | <b>Trib3</b>  | tribbles homolog 3 (Drosophila)                                 | 1.52               | <1.00E-04                  |
|                                         | 160939_at   | <a href="#">13345</a>  | <b>Twist2</b> | twist homolog 2 (Drosophila)                                    | 1.73               | <1.00E-04                  |
|                                         | 94821_at    | <a href="#">22433</a>  | <b>Xbp1</b>   | X-box binding protein 1                                         | 0.53               | 2.00E-04                   |
| <b>RNA metabolism</b>                   | 160791_at   | <a href="#">67684</a>  | <b>Luc7a</b>  | RIKEN cDNA 3300001P08 gene                                      | 0.66               | 5.00E-04                   |
|                                         | 96777_at    | <a href="#">81898</a>  | <b>Sf3b1</b>  | splicing factor 3b, subunit 1                                   | 0.57               | 1.00E-04                   |
|                                         | 92579_at    | <a href="#">20823</a>  | <b>Ssb</b>    | Sjogren syndrome antigen B                                      | 0.61               | 0.0083                     |
| <b>Metabolism</b>                       |             |                        |               |                                                                 |                    |                            |
| Carboidrate Met                         | 100088_at   | <a href="#">19046</a>  | <b>Ppp1cb</b> | protein phosphatase 1, catalytic subunit, beta isoform          | 0.6                | 1.00E-04                   |
| Lipid metabolism                        | 95064_at    | <a href="#">52538</a>  | <b>Acaa2</b>  | acetyl-Coenzyme A acyltransferase 2                             | 1.5                | <1.00E-04                  |
|                                         | 98575_at    | <a href="#">14104</a>  | <b>Fasn</b>   | fatty acid synthase                                             | 0.62               | 1.00E-04                   |
|                                         | 102768_i_at | <a href="#">235293</a> | <b>Sc5d</b>   | sterol-C5-desaturase homolog                                    | 0.54               | 0.0062                     |

| Function                    | Affy ID               | Locus ID               | Gene symbol                                | Description                              | RhoAi <sup>b</sup> | p-value RhoAi <sup>c</sup> |
|-----------------------------|-----------------------|------------------------|--------------------------------------------|------------------------------------------|--------------------|----------------------------|
| Metabolism/Other            | 96058_s_at            | <a href="#">11669</a>  | <b>Aldh2</b>                               | aldehyde dehydrogenase 2, mitochondrial  | 1.52               | 0.0046                     |
|                             | 160647_at             | <a href="#">12353</a>  | <b>Car6</b>                                | carbonic anhydrase 6                     | 1.54               | <1.00E-04                  |
|                             | 98440_at              | <a href="#">67103</a>  | <b>Ltb4dh</b>                              | leukotriene B4 12-hydroxydehydrogenase   | 1.97               | <1.00E-04                  |
|                             | 104406_at             | <a href="#">64292</a>  | <b>Ptges</b>                               | prostaglandin E synthase                 | 1.7                | 7.00E-04                   |
|                             | 104716_at             | <a href="#">19659</a>  | <b>Rbp1</b>                                | retinol binding protein 1, cellular      | 1.64               | <1.00E-04                  |
|                             | 96623_at              | <a href="#">22234</a>  | <b>Ugcg</b>                                | UDP-glucose ceramide glucosyltransferase | 0.62               | 1.00E-04                   |
| <b>ER protein transport</b> | 160291_at             | <a href="#">53421</a>  | <b>Slc6a9</b>                              | solute carrier family 6 , memb. 9        | 1.52               | 0.0041                     |
| <b>Other</b>                | 160131_at             | <a href="#">56332</a>  | <b>Amotl2</b>                              | angiotensin like 2                       | 0.46               | <1.00E-04                  |
|                             | 162399_f_at           | <a href="#">20239</a>  | <b>Atxn2</b>                               | ataxin 2                                 | 0.59               | 5.00E-04                   |
|                             | 102811_at             | <a href="#">14042</a>  | <b>Ext1</b>                                | exostoses (multiple) 1                   | 0.65               | 2.00E-04                   |
|                             | 99109_at              | <a href="#">15936</a>  | <b>Ier2</b>                                | immediate early response 2               | 0.45               | <1.00E-04                  |
|                             | 92773_at              | <a href="#">15939</a>  | <b>Ier5</b>                                | immediate early response 5               | 0.32               | <1.00E-04                  |
|                             | 160464_s_at           | <a href="#">17988</a>  | <b>Ndr1</b>                                | N-myc downstream regulated 1             | 1.52               | <1.00E-04                  |
|                             | 94351_r_at            | <a href="#">18104</a>  | <b>Nqo1</b>                                | NAD(P)H dehydrogenase, quinone 1         | 1.7                | 2.00E-04                   |
|                             | 95883_at              | <a href="#">269424</a> | <b>Phf17</b>                               | PHD finger protein 17                    | 0.59               | 8.00E-04                   |
|                             | 96278_at              | <a href="#">66151</a>  | <b>Prr13</b>                               | proline rich 13                          | 1.7                | <1.00E-04                  |
|                             | 160726_at             | <a href="#">19317</a>  | <b>Qk</b>                                  | quaking                                  | 0.57               | 0.0011                     |
| 100878_at                   | <a href="#">94186</a> | <b>Strn3</b>           | striatin, calmodulin binding protein 3     | 0.65                                     | 3.00E-04           |                            |
| 93821_at                    | <a href="#">52357</a> | <b>Wwc2</b>            | WW, C2 and coiled-coil domain containing 2 | 0.57                                     | 1.00E-04           |                            |
| <b>Unknown</b>              | 103260_at             | <a href="#">68813</a>  | <b>1110060D06Rik</b>                       | RIKEN cDNA 1110060D06 gene               | 0.64               | 1.00E-04                   |
|                             | 96135_at              | <a href="#">73112</a>  | <b>3110003A17Rik</b>                       | RIKEN cDNA 3110003A17 gene               | 0.65               | 0.0082                     |
|                             | 92211_at              | <a href="#">100563</a> | <b>AF013969</b>                            | expressed sequence AF013969              | 0.67               | 0.0039                     |
